# Supplementary material for: Differentiation‐Associated MicroRNA Alterations in Mouse Heart‐Derived Sca‐1+CD31− and Sca‐1+CD31+ Cells
Source: Hindawi journal article supplement (doi:10.1155/2016/9586751), 2016-01-01
Supplement: f1 [file 9586751.f1.zip]

| GO ID      | GO Name                 | Gene Counts | Gene Amount in | Enrichment Score | p-value   | FDR      |
|------------|-------------------------|-------------|----------------|------------------|-----------|----------|
| GO:0007155 | cell adhesion           | 127         | 500            | 8.2896234        | 1.33E-77  | 5.12E-74 |
| GO:0001525 | angiogenesis            | 70          | 189            | 12.087523        | 1.32E-55  | 2.54E-52 |
| GO:0007275 | multicellular           | 142         | 954            | 4.8578159        | 4.78E-55  | 6.14E-52 |
| GO:0030154 | cell differentiation    | 101         | 636            | 5.1828106        | 8.78E-42  | 8.45E-39 |
| GO:0008285 | negative regulation     | 69          | 315            | 7.1489066        | 6.16E-38  | 4.74E-35 |
| GO:0045944 | positive regulation     | 104         | 745            | 4.5559416        | 7.48E-38  | 4.80E-35 |
| GO:0043065 | positive regulation     | 62          | 258            | 7.8428348        | 1.07E-36  | 5.91E-34 |
| GO:0008284 | positive regulation     | 73          | 382            | 6.2367822        | 7.15E-36  | 3.44E-33 |
| GO:0043066 | negative regulation     | 81          | 480            | 5.5073777        | 1.32E-35  | 5.64E-33 |
| GO:0030335 | positive regulation     | 45          | 129            | 11.38476         | 9.21E-35  | 3.55E-32 |
| GO:0008152 | metabolic process       | 109         | 991            | 3.5896651        | 2.82E-30  | 9.86E-28 |
| GO:0007395 | nervous system          | 60          | 307            | 6.3784324        | 3.18E-30  | 1.02E-27 |
| GO:0016310 | phosphorylation         | 87          | 684            | 4.1511099        | 8.55E-29  | 2.53E-26 |
| GO:0000122 | negative regulation     | 77          | 561            | 4.4794939        | 9.49E-28  | 2.61E-25 |
| GO:0016477 | cell migration          | 38          | 125            | 9.921439         | 5.30E-27  | 1.36E-24 |
| GO:0006468 | protein phosphorylation | 79          | 611            | 4.2197524        | 1.06E-26  | 2.54E-24 |
| GO:0007507 | heart development       | 41          | 167            | 8.0125079        | 4.98E-25  | 1.13E-22 |
| GO:0006355 | regulation of           | 145         | 1852           | 2.5552189        | 2.09E-24  | 4.48E-22 |
| GO:0006915 | apoptotic process       | 70          | 540            | 4.2306331        | 7.71E-24  | 1.56E-21 |
| GO:0001938 | positive regulation     | 24          | 49             | 15.985133        | 2.441E-23 | 4.70E-21 |

| Gene Symbols                                                                          | Rank |
|---------------------------------------------------------------------------------------|------|
| Cdh23 Srp2 Negr1 Cdh19 Pdpn Prkca Cdh11 Parvb Thbs1 Svep1 Ret Scarb2 Postn Cx         | 1    |
| Tmem100 Mmp2 Meis1 Nos3 Nrp1 Robo4 Srp2 Tnfrsf2 Arhgap24 Prkd1 Ptk2 Prkd2 Ct          | 2    |
| Sema3c Lrp1 Sema6b Wnt9a Smo Eya2 Dli1 Adcyap1r1 Spred2 Dact1 Ift81 Heyl Efna5 F      | 3    |
| Dock7 Adcyap1r1 Pgf Gata2 Slfn5 Sdc2 Slit3 Robo4 Hip1 Gli2 Musk Cbfa2t3 Itgav Sema    | 4    |
| Gli3 Hmox1 Timp2 Sox7 Cav1 Notch2 Tgfb2 Slfn3 Prkca Smad3 Rgcc Skap2 Wt1 Ptgs2        | 5    |
| Plscr1 Nfix Nr1h4 Mkl2 Pparg Epas1 Lmo4 Hexb Gli1 Tbx20 Lif Cebpa Pygo1 Foxs1 Mef     | 6    |
| Maged1 Casp1 Slit2 Alox12 G0s2 Sept4 Sfrp2 Anxa1 Map3k1 Wnt11 Bmp2 Bmp4 Uaca          | 7    |
| Ptgs2 Kdr Ddr2 Acer2 Adrb2 Il6ra Bcl2l1 Vegfa Ctgf Igf1 Smo Avpr1a Rogdi Ednrb Hlx Zf | 8    |
| Sox9 Dpep1 Notch1 Bmp4 Pdgfrb Cryab Ctsh Gimap5 Vimp Timp1 ApoE Foxc2 Smad3 C         | 9    |
| Ctsh Pdgfra Pld1 Egfr Itgav Ptp4a1 Snai1 Trip6 Ret Irs1 Aqp1 Irs2 Zfp703 Has2 Smad3 C | 10   |
| Ust Isoc1 Pde5a Bdh2 Gfod1 Enpp2 Acsf2 Arb Cd38 Alpl Kifc3 Dusp3 Dusp6 Zdhc18 C       | 11   |
| Epha7 Atoh8 Igf1 Ndr2 Efnb2 Ephb1 Mtss1 Ret Nrp1 Srgap2 Hdac9 Mef2c Camk1d Efn        | 12   |
| Map3k11 Nik Ptpn3 Jak3 Prkd2 Rps6kl1 Flt1 Mst1r Itpkb Snrk Ddr2 Pik3cb Gk5 Pak1 Prk   | 13   |
| Nr1h4 Dach1 Tgif1 Dact1 Ripply3 Tbx20 Glis2 Bhlhe40 Cebpa Efna1 Gli3 Cdkn1c Eng B     | 14   |
| Thbs1 Snai1 Fmn1 Cd248 Nck2 Podxl Kdr Lrrc16a Eng Ctgf Vegfa Pdgfra Lamb1 Nck1 C      | 15   |
| Ephb1 Epha7 Jak3 Mapk11 Mertk Prkd1 Tgfb3 Pdgfra Ddr2 Snrk Sgk1 Ror1 Lyn Prkab2       | 16   |
| Hdac9 Pkd1 Fbn1 Gli3 Tnnt2 Mkl2 Adap2 Pdlim3 Bmp4 Tgfb1 Bmpr1a Ptprij Sema3c Co       | 17   |
| Cdk8 Gata2 Nr4a1 Zfp354c Mapk11 Nfkbiz Heyl Apbb2 Atf5 Ralgapa1 Eya4 Bhlhe40 Elk      | 18   |
| Tnfrsf21 Dram2 Xaf1 Tnfrsf12a Dapk1 Tmem173 Epha7 Nr4a1 Tgfb1 Gadd45b Mef2c G         | 19   |
| Egr3 Bmp4 Nrarp Ccl11 Prkd1 Cav1 Fgf2 Pdgfb Cav2 Ecm1 Kdr Prkd2 Pgf Cdh13 Cxcl12      | 20   |
