# Supplementary material for: Differentiation‐Associated MicroRNA Alterations in Mouse Heart‐Derived Sca‐1+CD31− and Sca‐1+CD31+ Cells
Source: Hindawi journal article supplement (doi:10.1155/2016/9586751), 2016-01-01
Supplement: f1 [file 9586751.f1.zip]

| Probe Set | Gene Symb | Accession | Gene Desc        | Database | S | Mean Sign | Mean Sign | Fold Chang | Rank |
|-----------|-----------|-----------|------------------|----------|---|-----------|-----------|------------|------|
| TC0100001 | Ptgs2     | NM_01119  | "Mus musc RefSeq |          |   | 10.42688  | 4.994938  | 43.16952   | 1    |
| TC020000C | Tnfaip6   | NM_00939  | "Mus musc RefSeq |          |   | 9.135637  | 3.854242  | 38.89182   | 2    |
| TC1500001 | C7        | NM_00124  | "Mus musc RefSeq |          |   | 9.826669  | 4.579502  | 37.97997   | 3    |
| TC1100004 | Abca6     | NM_14721  | "Mus musc RefSeq |          |   | 9.349654  | 4.416313  | 30.55509   | 4    |
| TC110000C | Gfpt2     | NM_01352  | "Mus musc RefSeq |          |   | 10.72557  | 5.903226  | 28.29249   | 5    |
| TC1100004 | Abca9     | NM_14722  | "Mus musc RefSeq |          |   | 9.317104  | 4.52298   | 27.74439   | 6    |
| TC1700002 | C3        | NM_00977  | "Mus musc RefSeq |          |   | 11.07218  | 6.372789  | 25.98105   | 7    |
| TC0100001 | Kcnt2     | NM_00108  | "Mus musc RefSeq |          |   | 8.345459  | 3.655662  | 25.8089    | 8    |
| TC110000C | Efemp1    | NM_14601  | "Mus musc RefSeq |          |   | 9.064316  | 4.388436  | 25.56114   | 9    |
| TC0600001 | Mfap5     | NM_01577  | "Mus musc RefSeq |          |   | 10.35433  | 5.723978  | 24.76703   | 10   |
| TC150000C | Col14a1   | NM_18127  | "Mus musc RefSeq |          |   | 9.704146  | 5.110921  | 24.13785   | 11   |
| TC1000001 | Lama2     | NM_00848  | "Mus musc RefSeq |          |   | 10.38365  | 5.859805  | 23.00453   | 12   |
| TC0700001 | Olfml1    | NM_17290  | "Mus musc RefSeq |          |   | 7.867038  | 3.39464   | 22.19862   | 13   |
| TC010000C | Pi15      | NM_05319  | "Mus musc RefSeq |          |   | 7.843122  | 3.379739  | 22.06034   | 14   |
| TC0500001 | Gpr133    | NM_00108  | "Mus musc RefSeq |          |   | 9.662302  | 5.233691  | 21.53499   | 15   |
| TC1600001 | Pla1a     | NM_13410  | "Mus musc RefSeq |          |   | 9.273029  | 4.861741  | 21.27796   | 16   |
| TC050000C | Sema3c    | NM_01365  | "Mus musc RefSeq |          |   | 8.252346  | 3.849847  | 21.14873   | 17   |
| TC130000C | Omd       | NM_01205  | "Mus musc RefSeq |          |   | 7.805657  | 3.415406  | 20.96994   | 18   |
| TC0200003 | Scn7a     | NM_00913  | "Mus musc RefSeq |          |   | 10.01564  | 5.63295   | 20.86027   | 19   |
| TC1200001 | Serpina3n | NM_00925  | "Mus musc RefSeq |          |   | 9.498101  | 5.1176    | 20.8287    | 20   |
| TC1300002 | Vcan      | NM_00113  | "Mus musc RefSeq |          |   | 8.736898  | 4.378549  | 20.51133   | 21   |
| TC0X00001 | Srpx2     | NM_02683  | "Mus musc RefSeq |          |   | 8.813413  | 4.485347  | 20.08527   | 22   |
| TC1100003 | Abca8a    | NM_15314  | "Mus musc RefSeq |          |   | 10.44816  | 6.131154  | 19.9319    | 23   |
| TC0500003 | Medag     | NM_02751  | "Mus musc RefSeq |          |   | 9.514001  | 5.202251  | 19.8594    | 24   |
| TC170000C | Tnxb      | NM_03117  | "Mus musc RefSeq |          |   | 10.60375  | 6.324486  | 19.41725   | 25   |
| TC0900001 | Pcolce2   | NM_02962  | "Mus musc RefSeq |          |   | 10.02489  | 5.747079  | 19.39762   | 26   |
| TC0300002 | Igsf10    | NM_00116  | "Mus musc RefSeq |          |   | 8.420385  | 4.1446    | 19.37044   | 27   |
| TC110000C | Egfr      | NM_00791  | "Mus musc RefSeq |          |   | 8.98475   | 4.720648  | 19.21421   | 28   |
| TC050000C | Il6       | NM_03116  | "Mus musc RefSeq |          |   | 8.234257  | 4.002262  | 18.79133   | 29   |
| TC0800001 | Mmp2      | NM_00861  | "Mus musc RefSeq |          |   | 11.35605  | 7.124074  | 18.79112   | 30   |
| TC1000001 | Tcf21     | NM_01154  | "Mus musc RefSeq |          |   | 9.709562  | 5.503065  | 18.46213   | 31   |
| TC0800001 | Dpep1     | NM_00787  | "Mus musc RefSeq |          |   | 10.58843  | 6.386493  | 18.40385   | 32   |
| TC0900002 | Loxl1     | NM_01072  | "Mus musc RefSeq |          |   | 10.50025  | 6.318099  | 18.15321   | 33   |
| TC0900002 | Islr      | NM_00119  | "Mus musc RefSeq |          |   | 9.470211  | 5.295041  | 18.06556   | 34   |
| TC070000C | Pcsk6     | NM_01104  | "Mus musc RefSeq |          |   | 10.74182  | 6.60007   | 17.65193   | 35   |
| TC130000C | Tgfb1     | NM_00936  | "Mus musc RefSeq |          |   | 10.18431  | 6.05162   | 17.54138   | 36   |
| TC1100003 | Abca8b    | NM_01385  | "Mus musc RefSeq |          |   | 8.992709  | 4.869924  | 17.42136   | 37   |
| TC080000C | Sfrp1     | NM_01383  | "Mus musc RefSeq |          |   | 9.846081  | 5.735999  | 17.26863   | 38   |
| TC190000C | Lrrn4cl   | NM_00101  | "Mus musc RefSeq |          |   | 8.935759  | 4.827095  | 17.25167   | 39   |
| TC0100001 | Myoc      | NM_01086  | "Mus musc RefSeq |          |   | 8.680308  | 4.573011  | 17.23533   | 40   |
| TC1100001 | Ccl7      | NM_01365  | "Mus musc RefSeq |          |   | 8.056894  | 3.958473  | 17.12962   | 41   |
| TC0600002 | Antxr1    | NM_05404  | "Mus musc RefSeq |          |   | 9.512844  | 5.420735  | 17.05484   | 42   |
| TC0200005 | Sulf2     | NM_00125  | "Mus musc RefSeq |          |   | 10.35372  | 6.264021  | 17.02641   | 43   |
| TC030000C | Postn     | NM_00119  | "Mus musc RefSeq |          |   | 9.414208  | 5.347497  | 16.75722   | 44   |
| TC1000001 | Lum       | NM_00852  | "Mus musc RefSeq |          |   | 10.47261  | 6.41788   | 16.61867   | 45   |
| TC020000C | Plxdc2    | NM_02616  | "Mus musc RefSeq |          |   | 10.47682  | 6.430157  | 16.52599   | 46   |

|                    |                           |          |          |          |    |
|--------------------|---------------------------|----------|----------|----------|----|
| TC160000C Abi3bp   | NM_00101 "Mus musc RefSeq | 9.904744 | 5.889967 | 16.16472 | 47 |
| TC190000C Ms4a4d   | NM_02565 "Mus musc RefSeq | 9.778174 | 5.784103 | 15.93438 | 48 |
| TC020000C Itih5    | NM_17247 "Mus musc RefSeq | 8.905849 | 4.913481 | 15.91558 | 49 |
| TC0X00002 Gabra3   | NM_00806 "Mus musc RefSeq | 8.10325  | 4.126899 | 15.73986 | 50 |
| TC1700001 Thbs2    | NM_01158 "Mus musc RefSeq | 9.59001  | 5.632303 | 15.53776 | 51 |
| TC130000C Ogn      | NM_00876 "Mus musc RefSeq | 10.94485 | 7.002756 | 15.37055 | 52 |
| TC0300001 F3       | NM_01017 "Mus musc RefSeq | 7.41203  | 3.481693 | 15.24577 | 53 |
| TC1000003 Lrp1     | NM_00851 "Mus musc RefSeq | 10.92542 | 6.996996 | 15.22554 | 54 |
| TC170000C Smoc2    | NM_02231 "Mus musc RefSeq | 9.664726 | 5.738447 | 15.20295 | 55 |
| TC0100002 Serpine2 | NM_00925 "Mus musc RefSeq | 8.69521  | 4.770588 | 15.1855  | 56 |
| TC010000C Col3a1   | NM_00993 "Mus musc RefSeq | 10.66913 | 6.746287 | 15.16673 | 57 |
| TC0100003 Ddr2     | NM_02256 "Mus musc RefSeq | 9.475402 | 5.559481 | 15.09419 | 58 |
| TC090000C Cilp     | NM_17338 "Mus musc RefSeq | 8.735873 | 4.828939 | 15.00045 | 59 |
| TC1700001 Qpct     | NM_02745 "Mus musc RefSeq | 8.233848 | 4.332274 | 14.94482 | 60 |
| TC0100002 Cdh19    | NM_00108 "Mus musc RefSeq | 7.153038 | 3.254796 | 14.91035 | 61 |
| TC0800001 Crispld2 | NM_03020 "Mus musc RefSeq | 9.728717 | 5.837375 | 14.83921 | 62 |
| TC0100001 Olfml2b  | NM_17706 "Mus musc RefSeq | 9.162374 | 5.27294  | 14.81959 | 63 |
| TC0200003 Frzb     | NM_01135 "Mus musc RefSeq | 8.430536 | 4.542925 | 14.80088 | 64 |
| TC190000C Cd248    | NM_05404 "Mus musc RefSeq | 10.50761 | 6.643854 | 14.55811 | 65 |
| TC1000001 Enpp1    | NM_00881 "Mus musc RefSeq | 7.886095 | 4.031273 | 14.46829 | 66 |
| TC010000C Efhd1    | NM_02888 "Mus musc RefSeq | 8.314173 | 4.464009 | 14.42165 | 67 |
| TC030000C Hmgcs2   | NM_00825 "Mus musc RefSeq | 8.981927 | 5.139481 | 14.3447  | 68 |
| TC190000C Aldh1a1  | NM_01346 "Mus musc RefSeq | 8.926653 | 5.092446 | 14.26301 | 69 |
| TC130000C Aspn     | NM_02571 "Mus musc RefSeq | 9.664908 | 5.854146 | 14.0331  | 70 |
| TC0100003 Pla2g4a  | NM_00886 "Mus musc RefSeq | 7.527216 | 3.72077  | 13.99118 | 71 |
| TC0700003 Anpep    | NM_00848 "Mus musc RefSeq | 9.503523 | 5.722171 | 13.74993 | 72 |
| TC060000C Col1a2   | NM_00774 "Mus musc RefSeq | 10.26409 | 6.485061 | 13.72782 | 73 |
| TC030000C Mme      | NM_00128 "membran RefSeq  | 7.282216 | 3.516938 | 13.59758 | 74 |
| TC0500002 Htra3    | NM_03012 "Mus musc RefSeq | 10.91548 | 7.163639 | 13.47153 | 75 |
| TC0200001 Thbs1    | NM_01158 "Mus musc RefSeq | 10.13719 | 6.392996 | 13.40028 | 76 |
| TC150000C Sdc2     | NM_00830 "Mus musc RefSeq | 9.512215 | 5.77323  | 13.35201 | 77 |
| TC0800001 Htra4    | NM_00108 "Mus musc RefSeq | 8.986083 | 5.251083 | 13.31518 | 78 |
| TC0600001 C1rb     | NM_00111 "Mus musc RefSeq | 9.115675 | 5.382723 | 13.29629 | 79 |
| TC0400003 Pdpm     | NM_01032 "Mus musc RefSeq | 8.393104 | 4.665215 | 13.24971 | 80 |
| TC0900001 Naalad2  | NM_02827 "Mus musc RefSeq | 8.114182 | 4.390116 | 13.21465 | 81 |
| TC0900001 Tbx20    | NM_19426 "Mus musc RefSeq | 10.34843 | 6.637087 | 13.09866 | 82 |
| TC150000C Matn2    | NM_01676 "Mus musc RefSeq | 8.914239 | 5.2032   | 13.09586 | 83 |
| TC1000002 Bicc1    | NM_03139 "Mus musc RefSeq | 9.478445 | 5.768165 | 13.08897 | 84 |
| TC0800001 Mt2      | NM_00863 "Mus musc RefSeq | 11.45462 | 7.74728  | 13.06233 | 85 |
| TC0600003 C1s      | NM_14493 "Mus musc RefSeq | 8.884859 | 5.194334 | 12.91097 | 86 |
| TC040000C Gm13301  | ENSMUST0cdna:know ENSEMBL | 7.442954 | 3.757826 | 12.86276 | 87 |
| TC1400001 Bmpr1a   | NM_00975 "Mus musc RefSeq | 8.27183  | 4.58995  | 12.83383 | 88 |
| TC1000001 Dse      | NM_17250 "Mus musc RefSeq | 8.221529 | 4.566284 | 12.59907 | 89 |
| TC050000C Pdgmra   | NM_01105 "Mus musc RefSeq | 10.44936 | 6.796767 | 12.57596 | 90 |
| TC0200001 Fam171b  | NM_17551 "Mus musc RefSeq | 7.122452 | 3.469879 | 12.57575 | 91 |
| TC0700004 Nupr1    | NM_01973 "Mus musc RefSeq | 8.234543 | 4.583322 | 12.56397 | 92 |
| TC0100001 Dpt      | NM_01975 "Mus musc RefSeq | 11.80672 | 8.159849 | 12.52614 | 93 |

|                    |                             |          |          |          |     |
|--------------------|-----------------------------|----------|----------|----------|-----|
| TC0300000 Cp       | NM_00775 "Mus musc RefSeq   | 8.62971  | 4.992443 | 12.44304 | 94  |
| TC0900000 Oaf      | NM_17864 "Mus musc RefSeq   | 8.61009  | 4.979676 | 12.38407 | 95  |
| TC1900000 Scd1     | NM_00912 "Mus musc RefSeq   | 10.08092 | 6.453141 | 12.36143 | 96  |
| TC1100000 Ccl2     | NM_01133 "Mus musc RefSeq   | 8.301573 | 4.675707 | 12.3451  | 97  |
| TC1700000 Fndc1    | NM_00108 "Mus musc RefSeq   | 8.464807 | 4.842224 | 12.31703 | 98  |
| TC0700000 Axl      | NM_00946 "Mus musc RefSeq   | 10.82563 | 7.250443 | 11.91895 | 99  |
| TC1400000 Ebf2     | NM_01009 "Mus musc RefSeq   | 8.910652 | 5.338856 | 11.89098 | 100 |
| TC0600000 Gm5077   | NM_17386 "Mus musc RefSeq   | 8.324237 | 4.768911 | 11.75601 | 101 |
| TC0900000 Aldh1a2  | NM_00902 "Mus musc RefSeq   | 7.838708 | 4.292782 | 11.67966 | 102 |
| TC0500000 Spon2    | NM_13390 "Mus musc RefSeq   | 8.693323 | 5.184481 | 11.38326 | 103 |
| TC0100000 Irs1     | NM_01057 "Mus musc RefSeq   | 7.035169 | 3.526862 | 11.37904 | 104 |
| TC1100000 Col1a1   | NM_00774 "Mus musc RefSeq   | 10.48125 | 6.978707 | 11.33367 | 105 |
| TC0100000 Sulf1    | NM_00119 "Mus musc RefSeq   | 10.00579 | 6.504906 | 11.32064 | 106 |
| TC0400000 Slep1    | NM_02281 "Mus musc RefSeq   | 8.040477 | 4.548647 | 11.24982 | 107 |
| TC1500000 Kdelr3   | NM_13409 "Mus musc RefSeq   | 8.954509 | 5.467598 | 11.21153 | 108 |
| TC0100000 Cyp27a1  | NM_02426 "Mus musc RefSeq   | 9.098023 | 5.612763 | 11.19871 | 109 |
| TC1900000 Anxa1    | NM_01073 "Mus musc RefSeq   | 9.581556 | 6.114292 | 11.05988 | 110 |
| TC0300000 Sgms2    | NM_02894 "Mus musc RefSeq   | 7.801054 | 4.338976 | 11.0202  | 111 |
| TC1100000 Mrc2     | NM_00862 "Mus musc RefSeq   | 8.926595 | 5.465722 | 11.011   | 112 |
| TC0200000 Rnd3     | NM_02881 "Mus musc RefSeq   | 8.515618 | 5.056071 | 11.00088 | 113 |
| TC1000000 Col6a1   | NM_00993 "Mus musc RefSeq   | 10.13523 | 6.676036 | 10.99822 | 114 |
| TC0600000 C1ra     | NM_02314 "Mus musc RefSeq   | 8.700404 | 5.24182  | 10.99354 | 115 |
| TC0200000 Entpd2   | NM_00984 "Mus musc RefSeq   | 9.266197 | 5.845262 | 10.71036 | 116 |
| TC0200000 Pde1a    | NM_01674 "Mus musc RefSeq   | 7.205268 | 3.789851 | 10.66947 | 117 |
| TC0800000 Pdgfrl   | NM_02684 "Mus musc RefSeq   | 8.004271 | 4.595367 | 10.62141 | 118 |
| TC1100000 Ccl11    | NM_01133 "Mus musc RefSeq   | 7.789303 | 4.391236 | 10.54193 | 119 |
| TC1400000 Gm21451  | XM_00368 "PREDICTEI RefSeq  | 9.121288 | 5.72355  | 10.53953 | 120 |
| TC1600000 Vgll3    | NM_02857 "Mus musc RefSeq   | 7.686231 | 4.290045 | 10.52819 | 121 |
| TC0900000 Clec3b   | NM_01160 "Mus musc RefSeq   | 8.413428 | 5.020745 | 10.50266 | 122 |
| TC1700000 Pi16     | NM_02373 "Mus musc RefSeq   | 9.862012 | 6.474995 | 10.46149 | 123 |
| TC1000000 Col6a2   | NM_14600 "Mus musc RefSeq   | 9.872415 | 6.487995 | 10.44268 | 124 |
| TC1200000 Ifi2712a | NM_00128 "interferon RefSeq | 9.013762 | 5.635209 | 10.4003  | 125 |
| TC0500000 Fgl2     | NM_00801 "Mus musc RefSeq   | 8.281307 | 4.907612 | 10.36534 | 126 |
| TC1200000 Osr1     | NM_01185 "Mus musc RefSeq   | 9.593149 | 6.220127 | 10.3605  | 127 |
| TC0100000 Cfh      | NM_00988 "Mus musc RefSeq   | 11.01519 | 7.657831 | 10.2486  | 128 |
| TC0500000 Cxcl1    | NM_00817 "Mus musc RefSeq   | 10.13271 | 6.776875 | 10.23779 | 129 |
| TC0200000 Gm11037  | ENSMUST0 cdna:know ENSEMBL  | 3.328341 | 6.679293 | -10.2032 | 130 |
| TC0800000 Fat1     | NM_00108 "Mus musc RefSeq   | 8.732134 | 5.385047 | 10.17592 | 131 |
| TC1500000 Enpp2    | NM_00113 "Mus musc RefSeq   | 8.809086 | 5.472831 | 10.0998  | 132 |
| TC0500000 Serpine1 | NM_00887 "Mus musc RefSeq   | 9.213432 | 5.881487 | 10.06967 | 133 |
| TC0900000 Itga11   | NM_17692 "Mus musc RefSeq   | 8.521543 | 5.198336 | 10.00887 | 134 |
| TC0X00000 SrpX     | NM_01691 "Mus musc RefSeq   | 7.284581 | 3.968616 | 9.958752 | 135 |
| TC0200000 Serping1 | NM_00977 "Mus musc RefSeq   | 11.56924 | 8.255488 | 9.943474 | 136 |
| TC1900000 Il33     | NM_13377 "Mus musc RefSeq   | 7.540575 | 4.228603 | 9.931227 | 137 |
| TC1100000 Tmem100  | NM_02643 "Mus musc RefSeq   | 7.97942  | 4.674391 | 9.883548 | 138 |
| TC1500000 Fbln1    | NM_01018 "Mus musc RefSeq   | 10.3249  | 7.027284 | 9.83288  | 139 |
| TC0300000 Lhfp     | NM_17538 "Mus musc RefSeq   | 9.766135 | 6.485227 | 9.719674 | 140 |

|                     |                            |          |          |          |     |
|---------------------|----------------------------|----------|----------|----------|-----|
| TC0X00002 Itm2a     | NM_00840 "Mus musc RefSeq  | 9.056317 | 5.780612 | 9.684684 | 141 |
| TC0300001 Ngf       | NM_00111 "Mus musc RefSeq  | 9.525289 | 6.255459 | 9.645326 | 142 |
| TC0400004 Podn      | NM_00128 "podocan ( RefSeq | 9.355919 | 6.098609 | 9.561984 | 143 |
| TC0900003 Rbms3     | NM_00117 "Mus musc RefSeq  | 8.368533 | 5.119785 | 9.505404 | 144 |
| TC0700002 Rcn3      | NM_02655 "Mus musc RefSeq  | 10.10184 | 6.86143  | 9.450607 | 145 |
| TC1300002 Gpx8      | NM_02712 "Mus musc RefSeq  | 8.675526 | 5.443545 | 9.395572 | 146 |
| TC0500000 C1qtnf7   | NM_00113 "Mus musc RefSeq  | 7.81871  | 4.592763 | 9.356358 | 147 |
| TC1600000 Ccdc80    | NM_02643 "Mus musc RefSeq  | 10.42763 | 7.215215 | 9.269021 | 148 |
| TC1400001 Gpc6      | NM_01182 "Mus musc RefSeq  | 8.834048 | 5.624593 | 9.25001  | 149 |
| TC1600001 Tmem45a   | NM_01963 "Mus musc RefSeq  | 6.930958 | 3.724938 | 9.228013 | 150 |
| TC0100002 Col6a3    | NM_00124 "Mus musc RefSeq  | 8.728032 | 5.522352 | 9.225838 | 151 |
| TC0100003 Prelp     | NM_05407 "Mus musc RefSeq  | 11.62415 | 8.420704 | 9.211582 | 152 |
| TC0100000 Npas2     | NM_00871 "Mus musc RefSeq  | 8.85097  | 5.653696 | 9.172239 | 153 |
| TC1100000 Slit3     | NM_01141 "Mus musc RefSeq  | 8.747743 | 5.55835  | 9.122271 | 154 |
| TC0200000 Hmcn2     | XM_00308 "PREDICTEI RefSeq | 8.714573 | 5.539207 | 9.034007 | 155 |
| TC0300001 Pcdh18    | NM_13044 "Mus musc RefSeq  | 8.040283 | 4.868405 | 9.012192 | 156 |
| TC0900000 Mmp3      | NM_01080 "Mus musc RefSeq  | 7.09035  | 3.926528 | 8.962008 | 157 |
| TC1100001 Sox9      | NM_01144 "Mus musc RefSeq  | 8.875647 | 5.713259 | 8.953104 | 158 |
| TC0900001 Arhgap42  | NM_02782 "Mus musc RefSeq  | 7.14341  | 3.985138 | 8.927598 | 159 |
| TC1000001 Ntn4      | NM_02132 "Mus musc RefSeq  | 8.351673 | 5.194201 | 8.922648 | 160 |
| TC0X00001 Maob      | NM_17277 "Mus musc RefSeq  | 7.484751 | 4.327865 | 8.919025 | 161 |
| TC0200002 Lbp       | NM_00848 "Mus musc RefSeq  | 8.782724 | 5.6293   | 8.897648 | 162 |
| TC1100000 Mfap4     | NM_02956 "Mus musc RefSeq  | 10.17552 | 7.027116 | 8.866741 | 163 |
| TC0700002 Lsp1      | NM_00113 "Mus musc RefSeq  | 8.585427 | 5.43885  | 8.85552  | 164 |
| TC1100000 Adamts2   | NM_00127 "Mus musc RefSeq  | 9.47055  | 6.325478 | 8.846287 | 165 |
| TC0600003 Mgp       | NM_00859 "Mus musc RefSeq  | 11.62241 | 8.492051 | 8.756547 | 166 |
| TC1800000 Colec12   | NM_13044 "Mus musc RefSeq  | 9.216483 | 6.091834 | 8.72194  | 167 |
| TC0400000 Gem       | NM_01027 "Mus musc RefSeq  | 9.583283 | 6.469181 | 8.658409 | 168 |
| TC1900001 Myof      | NM_00109 "Mus musc RefSeq  | 7.554644 | 4.458858 | 8.54918  | 169 |
| TC1000002 Sobp      | NM_17540 "Mus musc RefSeq  | 7.621814 | 4.528008 | 8.537455 | 170 |
| TC0500000 Sema3d    | NM_02888 "Mus musc RefSeq  | 6.869658 | 3.780823 | 8.508088 | 171 |
| TC4_GL456 LOC101056 | ENSMUST0 cdna:know ENSEMBL | 7.889756 | 4.810019 | 8.454603 | 172 |
| TC0900001 Rbp1      | NM_01125 "Mus musc RefSeq  | 10.18989 | 7.112438 | 8.441246 | 173 |
| TC0400004 Angptl7   | NM_00103 "Mus musc RefSeq  | 7.891155 | 4.815876 | 8.428518 | 174 |
| TC0400001 Lepr      | NM_01070 "Mus musc RefSeq  | 6.568073 | 3.505842 | 8.352633 | 175 |
| TC0100003 Cd55      | NM_01001 "Mus musc RefSeq  | 10.59139 | 7.540923 | 8.284818 | 176 |
| TC0X00000 Ar        | NM_01347 "Mus musc RefSeq  | 8.441268 | 5.394408 | 8.264113 | 177 |
| TC0100001 Plekha6   | NM_00116 "Mus musc RefSeq  | 8.51324  | 5.475949 | 8.209481 | 178 |
| TC0300000 S100a6    | NM_01131 "Mus musc RefSeq  | 8.779554 | 5.743327 | 8.203429 | 179 |
| TC0X00001 Gpr64     | NM_17871 "Mus musc RefSeq  | 6.255924 | 3.223976 | 8.179133 | 180 |
| TC0600000 Akr1b8    | NM_00801 "Mus musc RefSeq  | 7.138819 | 4.116126 | 8.126832 | 181 |
| TC1000001 Rassf9    | NM_14624 "Mus musc RefSeq  | 4.750019 | 7.771024 | -8.11733 | 182 |
| TC0200004 Cpxm1     | NM_01969 "Mus musc RefSeq  | 8.109875 | 5.095996 | 8.077333 | 183 |
| TC0200004 Fbin      | NM_02627 "Mus musc RefSeq  | 7.626641 | 4.612943 | 8.07632  | 184 |
| TC1500000 Lgals1    | NM_00849 "Mus musc RefSeq  | 9.87574  | 6.869423 | 8.035106 | 185 |
| TC1700002 Cyp1b1    | NM_00999 "Mus musc RefSeq  | 7.207875 | 4.206299 | 8.008744 | 186 |
| TC1100002 Olfr1396  | NM_14633 "Mus musc RefSeq  | 5.33476  | 8.333995 | -7.99576 | 187 |

|                    |                             |          |          |          |     |
|--------------------|-----------------------------|----------|----------|----------|-----|
| TC0700003 Emp3     | NM_00114 "Mus musc RefSeq   | 10.71926 | 7.732801 | 7.925253 | 188 |
| TC1600000 Fstl1    | NM_00804 "Mus musc RefSeq   | 10.82415 | 7.840875 | 7.90777  | 189 |
| TC0700001 Adamtsl3 | NM_00119 "Mus musc RefSeq   | 8.662101 | 5.679057 | 7.906526 | 190 |
| TC4_JH584 Gm3893   | ENSMUST0cdna:know ENSEMBL   | 8.018448 | 5.059528 | 7.775417 | 191 |
| TC0400002 Gpr153   | NM_17840 "Mus musc RefSeq   | 8.704016 | 5.748123 | 7.75912  | 192 |
| TC0900000 Cdon     | NM_02133 "Mus musc RefSeq   | 8.423744 | 5.469731 | 7.749015 | 193 |
| TC0600002 Ret      | NM_00905 "Mus musc RefSeq   | 8.585426 | 5.633156 | 7.739659 | 194 |
| TC1400001 Pcdh17   | NM_00101 "Mus musc RefSeq   | 4.794196 | 7.743738 | -7.72504 | 195 |
| TC0900003 Trf      | NM_13397 "Mus musc RefSeq   | 8.474835 | 5.526815 | 7.716892 | 196 |
| TC0500000 Pcdh7    | NM_01876 "Mus musc RefSeq   | 7.160385 | 4.212835 | 7.714379 | 197 |
| TC0600003 Klra9    | NM_01065 "Mus musc RefSeq   | 3.938719 | 6.877435 | -7.66729 | 198 |
| TC0100003 Cfhr2    | NM_00102 "Mus musc RefSeq   | 7.589203 | 4.65095  | 7.664826 | 199 |
| TC0600002 Rarres2  | NM_02785 "Mus musc RefSeq   | 8.173999 | 5.238924 | 7.64796  | 200 |
| TC1600001 Adamts5  | NM_01178 "Mus musc RefSeq   | 10.40095 | 7.468578 | 7.633644 | 201 |
| TC0200003 Cd302    | NM_02542 "Mus musc RefSeq   | 7.980342 | 5.078479 | 7.473909 | 202 |
| TC0400001 Ror1     | NM_01384 "Mus musc RefSeq   | 7.140919 | 4.245979 | 7.43813  | 203 |
| TC0400003 Dock7    | NM_02608 "Mus musc RefSeq   | 7.696571 | 4.804745 | 7.422093 | 204 |
| TC1300000 Dapk1    | NM_02965 "Mus musc RefSeq   | 7.911338 | 5.019783 | 7.420699 | 205 |
| TC0800001 Mt1      | NM_01360 "Mus musc RefSeq   | 10.84961 | 7.959576 | 7.412869 | 206 |
| TC0800001 Gnao1    | NM_00111 "Mus musc RefSeq   | 8.32053  | 5.43083  | 7.411163 | 207 |
| TC0600000 Foxp2    | NM_05324 "Mus musc RefSeq   | 6.693416 | 3.81116  | 7.373022 | 208 |
| TC0300000 Selenbp1 | NM_00915 "Mus musc RefSeq   | 8.932341 | 6.052643 | 7.35996  | 209 |
| TC1600001 Apod     | NM_00747 "Mus musc RefSeq   | 7.566026 | 4.687137 | 7.355834 | 210 |
| TC1400000 Ang      | NM_00116 "Mus musc RefSeq   | 7.966702 | 5.10433  | 7.2721   | 211 |
| TC0700000 Ndn      | NM_01088 "Mus musc RefSeq   | 8.211223 | 5.352455 | 7.253956 | 212 |
| TC0700000 Clip3    | NM_00108 "Mus musc RefSeq   | 8.317243 | 5.465192 | 7.220261 | 213 |
| TC1300002 Gas1     | NM_00808 "Mus musc RefSeq   | 8.862494 | 6.011951 | 7.212718 | 214 |
| TC0300000 Notch2   | NM_01092 "Mus musc RefSeq   | 8.83836  | 5.989356 | 7.205028 | 215 |
| TC1100004 Timp2    | NM_01159 "Mus musc RefSeq   | 10.50241 | 7.660772 | 7.168325 | 216 |
| TC1500000 Adamts12 | NM_17550 "Mus musc RefSeq   | 7.607219 | 4.781124 | 7.091521 | 217 |
| TC0X00001 Gpm6b    | NM_00117 "Mus musc RefSeq   | 7.981886 | 5.166526 | 7.038949 | 218 |
| TC0100003 Gm4788   | NM_00116 "Mus musc RefSeq   | 7.578531 | 4.773894 | 6.986825 | 219 |
| TC1500001 Igfbp6   | NM_00834 "Mus musc RefSeq   | 8.787991 | 5.991187 | 6.948993 | 220 |
| TC0100000 Gsta3    | NM_00128 "glutathion RefSeq | 6.993719 | 4.198233 | 6.942648 | 221 |
| TC0700001 Spon1    | NM_14558 "Mus musc RefSeq   | 8.08727  | 5.294804 | 6.92813  | 222 |
| TC0400000 Reck     | NM_01667 "Mus musc RefSeq   | 8.663901 | 5.874462 | 6.913609 | 223 |
| TC0900000 Clmp     | NM_13373 "Mus musc RefSeq   | 7.792749 | 5.006282 | 6.899381 | 224 |
| TC1400000 Mmp14    | NM_00860 "Mus musc RefSeq   | 9.589367 | 6.806157 | 6.883823 | 225 |
| TC0400002 Mxra8    | NM_02426 "Mus musc RefSeq   | 9.478023 | 6.710751 | 6.808193 | 226 |
| TC1300002 Cxcl14   | NM_01956 "Mus musc RefSeq   | 8.25973  | 5.494244 | 6.79977  | 227 |
| TC0100001 Angptl1  | NM_02833 "Mus musc RefSeq   | 6.692763 | 3.92985  | 6.787654 | 228 |
| TC0300000 Selenbp2 | NM_01941 "Mus musc RefSeq   | 8.495876 | 5.736223 | 6.772333 | 229 |
| TC0X00002 Gpc3     | NM_01669 "Mus musc RefSeq   | 7.117006 | 4.362268 | 6.749301 | 230 |
| TC0900000 Pvrl1    | NM_02142 "Mus musc RefSeq   | 7.715743 | 4.965884 | 6.726514 | 231 |
| TC1400002 Pcdh9    | NM_00127 "Mus musc RefSeq   | 6.625521 | 3.887905 | 6.669673 | 232 |
| TC1000000 Ctgf     | NM_01021 "Mus musc RefSeq   | 9.533941 | 6.801958 | 6.643682 | 233 |
| TC1400000 Scara5   | NM_00116 "Mus musc RefSeq   | 7.821072 | 5.091396 | 6.633067 | 234 |

|                     |                            |          |          |          |     |
|---------------------|----------------------------|----------|----------|----------|-----|
| TC1500002 Slc38a4   | NM_02705 "Mus musc RefSeq  | 6.342768 | 3.61368  | 6.630364 | 235 |
| TC1400001 Gm9780    | XM_00147 "PREDICTEI RefSeq | 9.866395 | 7.140517 | 6.615627 | 236 |
| TC0900002 Tbx18     | NM_02381 "Mus musc RefSeq  | 6.309435 | 3.597277 | 6.553011 | 237 |
| TC0200000 Angptl2   | NM_01192 "Mus musc RefSeq  | 8.712865 | 6.004557 | 6.535547 | 238 |
| TC1000002 Plxnc1    | NM_01879 "Mus musc RefSeq  | 6.50985  | 3.801826 | 6.534261 | 239 |
| TC0400002 Necab1    | NM_17861 "Mus musc RefSeq  | 6.466725 | 3.76002  | 6.528289 | 240 |
| TC0200003 Dpp4      | NM_01007 "Mus musc RefSeq  | 6.074352 | 3.372178 | 6.507818 | 241 |
| TC1400000 Stc1      | NM_00928 "Mus musc RefSeq  | 4.949274 | 7.644088 | -6.4747  | 242 |
| TC0600001 Gxylt2    | NM_19861 "Mus musc RefSeq  | 7.534322 | 4.85259  | 6.416257 | 243 |
| TC0900003 Rtp3      | NM_15310 "Mus musc RefSeq  | 5.666934 | 8.325712 | -6.31498 | 244 |
| TC0100001 5430435G2 | NM_14550 "Mus musc RefSeq  | 6.984352 | 4.328186 | 6.303556 | 245 |
| TC0200000 Olfml2a   | NM_17285 "Mus musc RefSeq  | 7.827068 | 5.176101 | 6.280881 | 246 |
| TC0100002 St8sia4   | NM_00918 "Mus musc RefSeq  | 5.484162 | 8.126376 | -6.24289 | 247 |
| TC0100000 Aox1      | NM_00967 "Mus musc RefSeq  | 6.754842 | 4.116419 | 6.226507 | 248 |
| TC1100002 Ugp2      | NM_13929 "Mus musc RefSeq  | 8.462686 | 5.826824 | 6.215464 | 249 |
| TC0200003 Dnm1      | NM_01006 "Mus musc RefSeq  | 7.900035 | 5.26477  | 6.212892 | 250 |
| TC1400001 Itgbl1    | NM_14546 "Mus musc RefSeq  | 7.233826 | 4.598725 | 6.212186 | 251 |
| TC0300003 Fabp9     | NM_01159 "Mus musc RefSeq  | 4.837862 | 7.472445 | -6.20996 | 252 |
| TC0X00003 Il2rg     | NM_01356 "Mus musc RefSeq  | 6.311442 | 8.94463  | -6.20395 | 253 |
| TC0900000 Arhgap20  | NM_17553 "Mus musc RefSeq  | 6.639917 | 4.011195 | 6.184779 | 254 |
| TC0500002 Ugdh      | NM_00946 "Mus musc RefSeq  | 9.11746  | 6.490347 | 6.177885 | 255 |
| TC0300003 Ifi44     | NM_13387 "Mus musc RefSeq  | 6.538617 | 9.164711 | -6.17352 | 256 |
| TC0200001 Casc4     | NM_19903 "Mus musc RefSeq  | 7.178049 | 4.555632 | 6.157808 | 257 |
| TC0700004 Dkk3      | NM_01581 "Mus musc RefSeq  | 8.256362 | 5.637403 | 6.143066 | 258 |
| TC0500000 Lrrc17    | NM_02897 "Mus musc RefSeq  | 6.875123 | 4.260432 | 6.12492  | 259 |
| TC0400002 Al464131  | NM_00108 "Mus musc RefSeq  | 6.451979 | 3.838638 | 6.119191 | 260 |
| TC0100002 Dock10    | NM_00128 "dedicator RefSeq | 6.431976 | 3.821392 | 6.107509 | 261 |
| TC0X00001 Klhl4     | NM_17278 "Mus musc RefSeq  | 4.636318 | 7.246802 | -6.10709 | 262 |
| TC0200002 St8sia6   | NM_14583 "Mus musc RefSeq  | 5.679417 | 8.28919  | -6.10408 | 263 |
| TC1600001 Bcl6      | NM_00974 "Mus musc RefSeq  | 7.909142 | 5.299457 | 6.103704 | 264 |
| TC0300000 Ctsk      | NM_00780 "Mus musc RefSeq  | 6.645002 | 4.035665 | 6.102232 | 265 |
| TC1000001 Cd63      | NM_00104 "Mus musc RefSeq  | 9.339638 | 6.731225 | 6.098325 | 266 |
| TC0100000 Twist2    | NM_00785 "Mus musc RefSeq  | 7.266052 | 4.658856 | 6.093183 | 267 |
| TC0200000 Adamtsl2  | NM_02998 "Mus musc RefSeq  | 8.238219 | 5.634318 | 6.079282 | 268 |
| TC1400000 Mmrn2     | NM_15312 "Mus musc RefSeq  | 7.058173 | 9.652641 | -6.03966 | 269 |
| TC1100001 Igfbp4    | NM_01051 "Mus musc RefSeq  | 10.16958 | 7.576681 | 6.03311  | 270 |
| TC1100003 Sclep1    | NM_02902 "Mus musc RefSeq  | 9.020447 | 6.428074 | 6.030899 | 271 |
| TC1000001 Mmp19     | NM_00116 "Mus musc RefSeq  | 7.11175  | 4.522277 | 6.018788 | 272 |
| TC1200002 Pgf       | NM_00127 "Mus musc RefSeq  | 8.653151 | 6.064721 | 6.014438 | 273 |
| TC1300001 Gm5454    | XM_48431 "PREDICTEI RefSeq | 7.861925 | 5.277497 | 5.997777 | 274 |
| TC0100002 Col5a2    | NM_00773 "Mus musc RefSeq  | 7.956141 | 5.37255  | 5.994299 | 275 |
| TC1600000 Robo1     | NM_01941 "Mus musc RefSeq  | 6.861347 | 4.279741 | 5.986057 | 276 |
| TC0500000 Cd38      | NM_00764 "Mus musc RefSeq  | 6.702959 | 9.282151 | -5.97605 | 277 |
| TC1500001 Has2      | NM_00821 "Mus musc RefSeq  | 7.697036 | 5.118077 | 5.975084 | 278 |
| TC0100001 Pydc3     | NM_00116 "Mus musc RefSeq  | 4.57571  | 7.152436 | -5.96584 | 279 |
| TC0600002 Inmt      | NM_00934 "Mus musc RefSeq  | 6.670563 | 4.094333 | 5.963792 | 280 |
| TC0X00000 Timp1     | NM_00104 "Mus musc RefSeq  | 7.173044 | 4.614814 | 5.889846 | 281 |

|                     |                             |          |          |          |     |
|---------------------|-----------------------------|----------|----------|----------|-----|
| TC0800001 Adcy7     | NM_00740 "Mus musc RefSeq   | 7.797838 | 5.241893 | 5.880525 | 282 |
| TC1800000 Tubb6     | NM_02647 "Mus musc RefSeq   | 9.279799 | 6.723945 | 5.880154 | 283 |
| TC1300002 Ctl2b     | NM_00779 "Mus musc RefSeq   | 5.12239  | 7.676302 | -5.87224 | 284 |
| TC0800002 Tenm3     | NM_00114 "Mus musc RefSeq   | 7.094586 | 4.541129 | 5.870393 | 285 |
| TC1100003 Serpinf1  | NM_01134 "Mus musc RefSeq   | 9.02882  | 6.475879 | 5.868293 | 286 |
| TC0600002 Hk2       | NM_01382 "Mus musc RefSeq   | 7.392107 | 4.842179 | 5.856051 | 287 |
| TC0400004 Rbp7      | NM_02202 "Mus musc RefSeq   | 6.692603 | 9.239593 | -5.84414 | 288 |
| TC0800002 Tmem184c  | NM_14559 "Mus musc RefSeq   | 8.305362 | 5.758456 | 5.843797 | 289 |
| TC0100003 Cxcr4     | NM_00991 "Mus musc RefSeq   | 6.319406 | 8.86587  | -5.84201 | 290 |
| TC1100000 Aebp1     | NM_00963 "Mus musc RefSeq   | 8.75504  | 6.216031 | 5.811896 | 291 |
| TC1300002 Rasgrf2   | NM_00902 "Mus musc RefSeq   | 6.107127 | 8.643605 | -5.80171 | 292 |
| TC0600001 8430408G2 | NM_00116 "Mus musc RefSeq   | 7.693295 | 10.22383 | -5.77785 | 293 |
| TC0X00000 Dock11    | NM_00100 "Mus musc RefSeq   | 7.210016 | 4.684109 | 5.759354 | 294 |
| TC0500000 Slit2     | NM_17880 "Mus musc RefSeq   | 6.161769 | 3.637581 | 5.752496 | 295 |
| TC1200000 Fam49a    | NM_00114 "Mus musc RefSeq   | 8.298017 | 5.775265 | 5.746773 | 296 |
| TC0300000 Tnfsf10   | NM_00942 "Mus musc RefSeq   | 6.048827 | 8.565086 | -5.72097 | 297 |
| TC0600000 Gimap4    | NM_17499 "Mus musc RefSeq   | 7.039266 | 9.547847 | -5.6906  | 298 |
| TC0500002 Cxcl9     | NM_00859 "Mus musc RefSeq   | 6.518565 | 9.026658 | -5.68868 | 299 |
| TC0100002 Aff3      | NM_01067 "Mus musc RefSeq   | 7.184222 | 4.677936 | 5.681556 | 300 |
| TC0200003 Fap       | NM_00798 "Mus musc RefSeq   | 6.657086 | 4.156996 | 5.657207 | 301 |
| TC0800001 Rhou      | NM_13395 "Mus musc RefSeq   | 7.908368 | 5.409782 | 5.651313 | 302 |
| TC1000002 Aim1      | NM_17239 "Mus musc RefSeq   | 4.839577 | 7.33352  | -5.63315 | 303 |
| TC1900001 Dtx4      | NM_17244 "Mus musc RefSeq   | 8.021329 | 5.535052 | 5.603301 | 304 |
| TC0500002 Antxr2    | NM_13373 "Mus musc RefSeq   | 8.908144 | 6.429128 | 5.575171 | 305 |
| TC0700002 Fxyd1     | NM_05299 "Mus musc RefSeq   | 10.3192  | 7.841011 | 5.571984 | 306 |
| TC0500003 Pcolce    | NM_00878 "Mus musc RefSeq   | 8.889259 | 6.412122 | 5.567914 | 307 |
| TC1400002 Gm3629    | ENSMUST0 cdna:putat ENSEMBL | 5.818052 | 8.29154  | -5.55385 | 308 |
| TC1500001 Angpt1    | NM_00964 "Mus musc RefSeq   | 5.805788 | 3.333603 | 5.548835 | 309 |
| TC1500000 Cpq       | NM_17607 "Mus musc RefSeq   | 7.712195 | 5.243253 | 5.536376 | 310 |
| TC0100000 Tmem182   | NM_00108 "Mus musc RefSeq   | 5.620164 | 8.086462 | -5.52624 | 311 |
| TC0600002 Gimap6    | NM_15317 "Mus musc RefSeq   | 6.608638 | 9.069721 | -5.5063  | 312 |
| TC1300000 Gli3      | NM_00813 "Mus musc RefSeq   | 6.92544  | 4.471078 | 5.480707 | 313 |
| TC1200002 Itgb8     | NM_17729 "Mus musc RefSeq   | 6.13986  | 3.686541 | 5.476746 | 314 |
| TC0300000 Thbs3     | NM_01369 "Mus musc RefSeq   | 7.344911 | 4.891633 | 5.47659  | 315 |
| TC1600001 Col8a1    | NM_00773 "Mus musc RefSeq   | 6.997908 | 4.552037 | 5.448545 | 316 |
| TC0600003 Clec1a    | NM_17552 "Mus musc RefSeq   | 6.579737 | 9.024122 | -5.44294 | 317 |
| TC0700001 Vwa3a     | NM_17769 "Mus musc RefSeq   | 6.319259 | 8.762451 | -5.43844 | 318 |
| TC1700001 Galm      | NM_17696 "Mus musc RefSeq   | 6.196969 | 3.756209 | 5.429277 | 319 |
| TC0200001 Pamr1     | NM_17374 "Mus musc RefSeq   | 6.79809  | 4.361863 | 5.412244 | 320 |
| TC1200001 Ahr       | NM_01346 "Mus musc RefSeq   | 6.256998 | 8.687344 | -5.39023 | 321 |
| TC1000001 Dcn       | NM_00119 "Mus musc RefSeq   | 11.57491 | 9.146332 | 5.383629 | 322 |
| TC1400002 Gm8281    | ENSMUST0 cdna:putat ENSEMBL | 5.247974 | 7.667814 | -5.35112 | 323 |
| TC1400002 Gm10340   | ENSMUST0 cdna:putat ENSEMBL | 5.958035 | 8.377874 | -5.35111 | 324 |
| TC1200000 Wdr35     | NM_00115 "Mus musc RefSeq   | 5.954505 | 3.536796 | 5.343218 | 325 |
| TC0700000 Ppp1r14a  | NM_02673 "Mus musc RefSeq   | 8.446202 | 6.03822  | 5.307314 | 326 |
| TC0300001 Gstm5     | NM_01036 "Mus musc RefSeq   | 7.140906 | 4.736692 | 5.293471 | 327 |
| TC0100003 Atp1a2    | NM_17840 "Mus musc RefSeq   | 8.66713  | 6.263457 | 5.291486 | 328 |

|                      |                                |          |          |          |     |
|----------------------|--------------------------------|----------|----------|----------|-----|
| TC1700001 Vit        | NM_02881 "Mus musc RefSeq      | 6.937416 | 4.534121 | 5.2901   | 329 |
| TC1600001 Ppl        | NM_00890 "Mus musc RefSeq      | 7.592842 | 5.190241 | 5.287556 | 330 |
| TC0100003 Prrx1      | NM_17568 "Mus musc RefSeq      | 6.322165 | 3.920353 | 5.284665 | 331 |
| TC1000002 Nav3       | NM_00108 "Mus musc RefSeq      | 6.019067 | 8.420375 | -5.28282 | 332 |
| TC1300002 Ctl2a      | NM_00114 "Mus musc RefSeq      | 5.645649 | 8.0465   | -5.28115 | 333 |
| TC1400000 Gm3317     | NM_00124 "Mus musc RefSeq      | 5.570532 | 7.966564 | -5.26354 | 334 |
| TC1400002 Gm3752     | ENSMUST0 cdna:putat ENSEMBL    | 5.63594  | 8.031971 | -5.26353 | 335 |
| TC1400002 Dach1      | NM_00782 "Mus musc RefSeq      | 6.210407 | 8.605601 | -5.26048 | 336 |
| TC0600003 Art4       | NM_02663 "Mus musc RefSeq      | 6.680746 | 4.286798 | 5.255937 | 337 |
| TC0700000 Atp10a     | NM_00972 "Mus musc RefSeq      | 7.114139 | 4.721299 | 5.251902 | 338 |
| TC1000000 Myct1      | NM_02679 "Mus musc RefSeq      | 7.104264 | 9.495381 | -5.24563 | 339 |
| TC1300000 Gcnt2      | NM_02388 "Mus musc RefSeq      | 5.249346 | 7.63932  | -5.24148 | 340 |
| TC0600002 Scrn1      | NM_02726 "Mus musc RefSeq      | 7.687758 | 5.298657 | 5.238308 | 341 |
| TC1400001 Plac9a     | NM_20722 "Mus musc RefSeq      | 9.551528 | 7.164239 | 5.231733 | 342 |
| TC1400002 Ednrb      | NM_00127 "Mus musc RefSeq      | 6.959049 | 9.345047 | -5.22705 | 343 |
| TC1400002 Gm3173     | ENSMUST0 cdna:putat ENSEMBL    | 5.975898 | 8.360011 | -5.22023 | 344 |
| TC0500002 Ldb2       | NM_01069 "Mus musc RefSeq      | 6.622529 | 9.006046 | -5.21807 | 345 |
| TC0600001 Apold1     | NM_00110 "Mus musc RefSeq      | 6.778768 | 9.161199 | -5.21415 | 346 |
| TC0500000 Abcb1a     | NM_01107 "Mus musc RefSeq      | 7.39314  | 9.77507  | -5.21234 | 347 |
| TC1300001 Zfp366     | NM_00100 "Mus musc RefSeq      | 7.969911 | 10.34586 | -5.19079 | 348 |
| TC0500001 Fam20c     | NM_03056 "Mus musc RefSeq      | 7.54452  | 5.169236 | 5.188379 | 349 |
| TC0700000 Cacng7     | NM_13318 "Mus musc RefSeq      | 8.230003 | 5.855431 | 5.18582  | 350 |
| TC1800001 Setbp1     | NM_05309 "Mus musc RefSeq      | 7.654639 | 5.283611 | 5.173096 | 351 |
| TC1600001 AU021092   | NM_00103 "Mus musc RefSeq      | 5.810475 | 8.181051 | -5.17148 | 352 |
| TC0600001 Pde3a      | NM_01877 "Mus musc RefSeq      | 7.702798 | 5.333324 | 5.167527 | 353 |
| TC1400000 Gm3043     | XM_00147 "PREDICTEI RefSeq     | 4.246931 | 6.612883 | -5.15493 | 354 |
| TC0300000 Ptx3       | NM_00898 "Mus musc RefSeq      | 7.194561 | 4.836657 | 5.126251 | 355 |
| TC1200002 LOC100047  | XM_00368 "PREDICTEI MGI/Jacksc | 8.209736 | 5.854069 | 5.118308 | 356 |
| TC0900000 Sesn3      | NM_03026 "Mus musc RefSeq      | 7.766145 | 5.410841 | 5.11702  | 357 |
| TC1100002 Tgtp2      | NM_00114 "Mus musc RefSeq      | 7.442976 | 9.797544 | -5.11441 | 358 |
| TC1400002 Gm3005     | ENSMUST0 cdna:putat ENSEMBL    | 6.338326 | 8.691387 | -5.10907 | 359 |
| TC0800000 Fgfr1      | NM_00107 "Mus musc RefSeq      | 9.255914 | 6.905916 | 5.098235 | 360 |
| TC0700004 Chst15     | NM_02993 "Mus musc RefSeq      | 6.096837 | 8.44645  | -5.09688 | 361 |
| TC0100001 F11r       | NM_17264 "Mus musc RefSeq      | 6.796703 | 9.145657 | -5.09455 | 362 |
| TC1700001 Rasgrp3    | NM_00116 "Mus musc RefSeq      | 8.105174 | 10.4536  | -5.09269 | 363 |
| TC1100001 Slfn3      | NM_01140 "Mus musc RefSeq      | 5.949217 | 8.29473  | -5.08241 | 364 |
| TC0600001 Pparg      | NM_00112 "Mus musc RefSeq      | 6.612323 | 8.955343 | -5.07364 | 365 |
| TC1100003 Alox12     | NM_00744 "Mus musc RefSeq      | 5.695808 | 8.036424 | -5.06519 | 366 |
| TC1900000 Cd274      | NM_02189 "Mus musc RefSeq      | 6.545994 | 8.886319 | -5.06417 | 367 |
| TC0300003 St6galnac3 | NM_01137 "Mus musc RefSeq      | 5.613388 | 7.952325 | -5.0593  | 368 |
| TC1100002 Btnl9      | NM_17279 "Mus musc RefSeq      | 7.837184 | 10.17469 | -5.05426 | 369 |
| TC0900002 Pknox2     | NM_00102 "Mus musc RefSeq      | 6.841389 | 4.506081 | 5.046587 | 370 |
| TC0300002 Ecm1       | NM_00125 "Mus musc RefSeq      | 9.184268 | 6.850626 | 5.040763 | 371 |
| TC1400002 Gm10340    | XM_00368 "PREDICTEI RefSeq     | 6.411445 | 8.744834 | -5.03988 | 372 |
| TC1400002 Gm2974     | ENSMUST0 cdna:putat ENSEMBL    | 5.787486 | 8.120875 | -5.03988 | 373 |
| TC0300002 Palmd      | NM_02324 "Mus musc RefSeq      | 7.105933 | 9.438363 | -5.03653 | 374 |
| TC0200000 Gsn        | NM_00120 "Mus musc RefSeq      | 11.82764 | 9.496329 | 5.032635 | 375 |



|                     |                            |          |          |          |     |
|---------------------|----------------------------|----------|----------|----------|-----|
| TC080000C Tmem255k  | NM_00114 "Mus musc RefSeq  | 7.463867 | 9.793257 | -5.02593 | 376 |
| TC0200001 Slc28a2   | NM_17298 "Mus musc RefSeq  | 7.47872  | 9.807062 | -5.02228 | 377 |
| TC140000C Gm3239    | ENSMUST0cdna:putat ENSEMBL | 5.873667 | 8.200581 | -5.01731 | 378 |
| TC140000C D830030K2 | NM_17713 "Mus musc RefSeq  | 3.909884 | 6.236797 | -5.01731 | 379 |
| TC1000003 Slc26a10  | NM_17761 "Mus musc RefSeq  | 8.061352 | 10.38584 | -5.00888 | 380 |
| TC030000C Dclk1     | NM_00111 "Mus musc RefSeq  | 6.421795 | 4.09853  | 5.004636 | 381 |
| TC160000C Dcbld2    | NM_02852 "Mus musc RefSeq  | 7.376999 | 5.053872 | 5.004157 | 382 |
| TC0200004 Fbn1      | NM_00799 "Mus musc RefSeq  | 10.65222 | 8.331983 | 4.994149 | 383 |
| TC1400002 Gm3591    | ENSMUST0cdna:putat ENSEMBL | 6.290323 | 8.609921 | -4.99193 | 384 |
| TC0500003 Oas2      | NM_14522 "Mus musc RefSeq  | 6.506766 | 8.823367 | -4.98157 | 385 |
| TC1400001 Gm10128   | ENSMUST0cdna:know ENSEMBL  | 6.009912 | 8.325998 | -4.97979 | 386 |
| TC160000C Cd80      | NM_00985 "Mus musc RefSeq  | 5.946187 | 3.631402 | 4.975305 | 387 |
| TC1000001 Kitl      | NM_01359 "Mus musc RefSeq  | 7.9084   | 10.22184 | -4.97068 | 388 |
| TC0200002 Plcb1     | NM_01967 "Mus musc RefSeq  | 6.403466 | 8.716448 | -4.96909 | 389 |
| TC0200001 Aplnr     | NM_01178 "Mus musc RefSeq  | 7.072255 | 9.384367 | -4.9661  | 390 |
| TC1900001 Fads2     | NM_01969 "Mus musc RefSeq  | 7.984712 | 5.675698 | 4.955443 | 391 |
| TC1000001 Fam26e    | NM_17890 "Mus musc RefSeq  | 6.02865  | 3.723716 | 4.941448 | 392 |
| TC140000C Gm3494    | ENSMUST0cdna:putat ENSEMBL | 5.980015 | 8.280418 | -4.92595 | 393 |
| TC0300002 Kirrel    | NM_00117 "Mus musc RefSeq  | 7.734817 | 5.43499  | 4.923987 | 394 |
| TC1400001 Plac9b    | NM_00127 "Mus musc RefSeq  | 9.263497 | 6.969829 | 4.903011 | 395 |
| TC1400002 Gm3642    | XM_00368 "PREDICTEI RefSeq | 5.040403 | 7.333883 | -4.90237 | 396 |
| TC0200004 Cd93      | NM_01074 "Mus musc RefSeq  | 7.998935 | 10.29145 | -4.89908 | 397 |
| TC0800001 Efnb2     | NM_01011 "Mus musc RefSeq  | 7.887359 | 10.17802 | -4.89282 | 398 |
| TC0200004 Ptprij    | NM_00113 "Mus musc RefSeq  | 7.713491 | 5.423198 | 4.891554 | 399 |
| TC1200002 Tgfb3     | NM_00936 "Mus musc RefSeq  | 8.80675  | 6.518585 | 4.884345 | 400 |
| TC1000001 Syne1     | NM_15339 "Mus musc RefSeq  | 6.850823 | 9.137815 | -4.88038 | 401 |
| TC1200001 Rsad2     | NM_02138 "Mus musc RefSeq  | 6.72168  | 9.007502 | -4.87642 | 402 |
| TC0300002 Gm4392    | XM_00148 "PREDICTEI RefSeq | 6.853548 | 4.570887 | 4.865746 | 403 |
| TC140000C D830030K2 | NM_17713 "Mus musc RefSeq  | 4.653882 | 6.931484 | -4.84871 | 404 |
| TC1400002 Gm3636    | XM_00368 "PREDICTEI RefSeq | 5.992423 | 8.26801  | -4.84195 | 405 |
| TC060000C Cav2      | NM_00127 "Mus musc RefSeq  | 7.232609 | 9.503983 | -4.82783 | 406 |
| TC020000C Col5a1    | NM_01573 "Mus musc RefSeq  | 8.268698 | 5.999951 | 4.819044 | 407 |
| TC140000C Gm10408   | NM_00125 "Mus musc RefSeq  | 4.014044 | 6.279572 | -4.8083  | 408 |
| TC0X00001 4930578C1 | NM_17522 "Mus musc RefSeq  | 5.598751 | 7.862141 | -4.80118 | 409 |
| TC0500002 Naaa      | NM_00116 "Mus musc RefSeq  | 7.070055 | 4.809065 | 4.793203 | 410 |
| TC0700002 Ceacam1   | NM_00103 "Mus musc RefSeq  | 7.839518 | 10.09857 | -4.78678 | 411 |
| TC0300001 Igsf3     | NM_20720 "Mus musc RefSeq  | 7.706697 | 5.45129  | 4.77469  | 412 |
| TC050000C Cacna2d1  | NM_00111 "Mus musc RefSeq  | 6.101176 | 3.847089 | 4.770323 | 413 |
| TC0600003 Klra10    | NM_00845 "Mus musc RefSeq  | 3.748872 | 5.994742 | -4.74323 | 414 |
| TC0900001 Gm11114   | ENSMUST0cdna:know ENSEMBL  | 4.675664 | 6.919006 | -4.73493 | 415 |
| TC100000C Nepn      | NM_02568 "Mus musc RefSeq  | 4.374456 | 6.617516 | -4.734   | 416 |
| TC1400001 Lmo7      | NM_20152 "Mus musc RefSeq  | 5.370317 | 7.612714 | -4.73183 | 417 |
| TC150000C Myc       | NM_00117 "Mus musc RefSeq  | 8.190085 | 5.949028 | 4.727433 | 418 |
| TC1200001 Efr3b     | NM_00108 "Mus musc RefSeq  | 6.633327 | 8.872323 | -4.72068 | 419 |
| TC0200002 Celf2     | NM_00111 "Mus musc RefSeq  | 6.258338 | 4.019914 | 4.718813 | 420 |
| TC030000C Stmn2     | NM_02528 "Mus musc RefSeq  | 6.54791  | 8.785783 | -4.71701 | 421 |
| TC0300002 Vcam1     | NM_01169 "Mus musc RefSeq  | 8.811947 | 6.576689 | 4.708469 | 422 |

|                     |                             |          |          |          |     |
|---------------------|-----------------------------|----------|----------|----------|-----|
| TC1500000 Parvb     | NM_13316 "Mus musc RefSeq   | 6.011881 | 8.245749 | -4.70394 | 423 |
| TC0200005 Ptgis     | NM_00896 "Mus musc RefSeq   | 8.01426  | 5.781367 | 4.700757 | 424 |
| TC1900000 Ltbp3     | NM_00852 "Mus musc RefSeq   | 8.398299 | 6.16564  | 4.699994 | 425 |
| TC0200001 Gm14085   | NM_00108 "Mus musc RefSeq   | 6.051926 | 8.284423 | -4.69947 | 426 |
| TC1400002 LOC100861 | NM_00127 "Mus musc RefSeq   | 5.777152 | 8.004397 | -4.68239 | 427 |
| TC0900000 Robo4     | NM_02878 "Mus musc RefSeq   | 7.731835 | 9.958856 | -4.68166 | 428 |
| TC0700003 Gm4070    | NM_00124 "Mus musc RefSeq   | 6.921353 | 9.148296 | -4.68141 | 429 |
| TC1400002 Gm3095    | XM_00308 "PREDICTEI RefSeq  | 6.016874 | 8.241636 | -4.67434 | 430 |
| TC1800001 Pcdh12    | NM_01737 "Mus musc RefSeq   | 6.371642 | 8.593444 | -4.66476 | 431 |
| TC1100003 Pitpnc1   | NM_14582 "Mus musc RefSeq   | 6.498242 | 8.719743 | -4.66378 | 432 |
| TC1700001 Has1      | NM_00821 "Mus musc RefSeq   | 7.244857 | 5.023632 | 4.662892 | 433 |
| TC0200001 Dll4      | NM_01945 "Mus musc RefSeq   | 7.703525 | 9.922075 | -4.65425 | 434 |
| TC1500000 Zfpm2     | NM_01176 "Mus musc RefSeq   | 7.411306 | 5.192778 | 4.654183 | 435 |
| TC1800001 Arap3     | NM_13920 "Mus musc RefSeq   | 7.234087 | 9.452285 | -4.65312 | 436 |
| TC1600002 Erg       | NM_13365 "Mus musc RefSeq   | 6.686506 | 8.903556 | -4.64942 | 437 |
| TC0100003 Uap1      | NM_13380 "Mus musc RefSeq   | 8.870206 | 6.653247 | 4.649124 | 438 |
| TC1900000 Scd2      | NM_00912 "Mus musc RefSeq   | 9.598916 | 7.385624 | 4.637322 | 439 |
| TC1200001 Nova1     | NM_02136 "Mus musc RefSeq   | 6.438579 | 4.228875 | 4.625804 | 440 |
| TC1000002 Tmtc2     | NM_17736 "Mus musc RefSeq   | 4.92179  | 7.131215 | -4.62491 | 441 |
| TC0800001 Irs2      | NM_00108 "Mus musc RefSeq   | 9.497908 | 7.289757 | 4.620827 | 442 |
| TC1700002 Twsg1     | NM_02305 "Mus musc RefSeq   | 9.710228 | 7.503931 | 4.614892 | 443 |
| TC1200000 Etv1      | NM_00796 "Mus musc RefSeq   | 6.808794 | 4.603095 | 4.61298  | 444 |
| TC1800001 Ecscr     | NM_00103 "Mus musc RefSeq   | 7.370599 | 9.574756 | -4.60805 | 445 |
| TC1400001 Gm2237    | ENSMUST0 cdna:putat ENSEMBL | 5.397391 | 7.601237 | -4.60706 | 446 |
| TC0100002 1700019D  | NM_14495 "Mus musc RefSeq   | 6.454549 | 4.250864 | 4.606545 | 447 |
| TC1400002 Gm3264    | NM_00124 "Mus musc RefSeq   | 6.474144 | 8.676822 | -4.60333 | 448 |
| TC1400002 Gm3739    | ENSMUST0 cdna:putat ENSEMBL | 5.29584  | 7.497301 | -4.59945 | 449 |
| TC0400000 Col15a1   | NM_00992 "Mus musc RefSeq   | 10.13786 | 7.937065 | 4.597313 | 450 |
| TC0800001 Cdh13     | NM_01970 "Mus musc RefSeq   | 6.819355 | 9.019755 | -4.59607 | 451 |
| TC1200000 Dact1     | NM_00119 "Mus musc RefSeq   | 8.642095 | 6.443141 | 4.591463 | 452 |
| TC0200004 Mall      | NM_14553 "Mus musc RefSeq   | 6.338498 | 8.535937 | -4.58664 | 453 |
| TC0100003 Daf2      | NM_00782 "Mus musc RefSeq   | 6.673442 | 4.479252 | 4.576327 | 454 |
| TC1000001 Igf1      | NM_01051 "Mus musc RefSeq   | 6.553955 | 4.359923 | 4.575825 | 455 |
| TC0900002 Smad3     | NM_01676 "Mus musc RefSeq   | 7.828316 | 5.635436 | 4.572173 | 456 |
| TC0500000 Nos3      | NM_00871 "Mus musc RefSeq   | 7.0479   | 9.239798 | -4.56906 | 457 |
| TC1500001 Samd12    | NM_17722 "Mus musc RefSeq   | 4.868389 | 7.059486 | -4.56653 | 458 |
| TC1100000 Flt4      | NM_00802 "Mus musc RefSeq   | 6.446761 | 8.637607 | -4.56573 | 459 |
| TC0200000 Etl4      | NM_00108 "Mus musc RefSeq   | 6.19645  | 8.387201 | -4.56543 | 460 |
| TC1500001 Pdgfb     | NM_01105 "Mus musc RefSeq   | 7.484879 | 9.675299 | -4.56438 | 461 |
| TC0900001 Sh3bgrl2  | NM_17250 "Mus musc RefSeq   | 4.774832 | 6.963656 | -4.55934 | 462 |
| TC1000001 Ust       | NM_17738 "Mus musc RefSeq   | 6.721352 | 4.532724 | 4.558717 | 463 |
| TC1200000 Prkch     | NM_00885 "Mus musc RefSeq   | 7.262531 | 9.451158 | -4.55871 | 464 |
| TC1200000 Frmd6     | NM_02812 "Mus musc RefSeq   | 8.366083 | 6.179893 | 4.55102  | 465 |
| TC0900001 Plscr2    | NM_00888 "Mus musc RefSeq   | 4.973009 | 7.157927 | -4.54701 | 466 |
| TC1100001 Nos2      | NM_01092 "Mus musc RefSeq   | 5.771758 | 7.955685 | -4.54389 | 467 |
| TC0400002 Aqp7      | NM_00747 "Mus musc RefSeq   | 8.615979 | 10.7964  | -4.53285 | 468 |
| TC1700002 Tubb4a    | NM_00945 "Mus musc RefSeq   | 8.620494 | 6.440353 | 4.531978 | 469 |

|                    |                             |          |          |          |     |
|--------------------|-----------------------------|----------|----------|----------|-----|
| TC0900003 Cmtm8    | NM_02729 "Mus musc RefSeq   | 5.691813 | 7.870738 | -4.52816 | 470 |
| TC0300000 Car13    | NM_02449 "Mus musc RefSeq   | 6.671566 | 4.492961 | 4.527156 | 471 |
| TC0600002 Timp4    | NM_08063 "Mus musc RefSeq   | 7.561941 | 9.740528 | -4.5271  | 472 |
| TC1100001 Cd300lg  | NM_02798 "Mus musc RefSeq   | 8.186467 | 10.36476 | -4.52618 | 473 |
| TC0200001 Nostrin  | NM_18154 "Mus musc RefSeq   | 6.231361 | 8.408314 | -4.52198 | 474 |
| TC0100001 Sox17    | NM_01144 "Mus musc RefSeq   | 5.535822 | 7.711201 | -4.51704 | 475 |
| TC0400003 Ptplad2  | NM_02576 "Mus musc RefSeq   | 4.922948 | 7.097896 | -4.5157  | 476 |
| TC0900000 Esam     | NM_02710 "Mus musc RefSeq   | 7.589701 | 9.763337 | -4.51159 | 477 |
| TC1700002 Stap2    | NM_14593 "Mus musc RefSeq   | 6.506559 | 8.679221 | -4.50855 | 478 |
| TC0900000 Bmper    | NM_02847 "Mus musc RefSeq   | 6.87749  | 4.704913 | 4.50828  | 479 |
| TC0400002 Gm11787  | XM_98433 "PREDICTEI RefSeq  | 6.962628 | 9.133866 | -4.5041  | 480 |
| TC0200001 Sirpa    | NM_00117 "Mus musc RefSeq   | 7.536576 | 5.366451 | 4.500624 | 481 |
| TC1100003 Arhgef15 | NM_17756 "Mus musc RefSeq   | 6.977323 | 9.145655 | -4.49503 | 482 |
| TC1400002 Gm3667   | ENSMUST0 cdna:putat ENSEMBL | 6.103836 | 8.269375 | -4.48634 | 483 |
| TC0400003 Cyp4b1   | NM_00782 "Mus musc RefSeq   | 7.520871 | 9.686285 | -4.48595 | 484 |
| TC1100000 Gpx3     | NM_00816 "Mus musc RefSeq   | 10.32624 | 8.161088 | 4.485143 | 485 |
| TC1400000 Il17d    | NM_14583 "Mus musc RefSeq   | 7.28192  | 5.116772 | 4.485124 | 486 |
| TC0800001 Gpr56    | NM_00119 "Mus musc RefSeq   | 8.669345 | 10.83274 | -4.47967 | 487 |
| TC0300002 S1pr1    | NM_00790 "Mus musc RefSeq   | 7.740748 | 9.902854 | -4.47568 | 488 |
| TC0400000 Glipr2   | NM_02745 "Mus musc RefSeq   | 7.931741 | 5.772586 | 4.466532 | 489 |
| TC1400002 Gm2897   | NM_00117 "Mus musc RefSeq   | 5.249527 | 7.408393 | -4.46564 | 490 |
| TC1400002 Gm3696   | NM_00102 "Mus musc RefSeq   | 4.637654 | 6.79652  | -4.46564 | 491 |
| TC0700001 Tm6sf1   | NM_14537 "Mus musc RefSeq   | 5.415636 | 7.570858 | -4.45437 | 492 |
| TC1000000 Dcbld1   | NM_02570 "Mus musc RefSeq   | 4.686653 | 6.840552 | -4.45029 | 493 |
| TC1600001 Cyrr1    | NM_14485 "Mus musc RefSeq   | 6.774858 | 8.928576 | -4.44973 | 494 |
| TC1800001 Afap111  | NM_17892 "Mus musc RefSeq   | 7.360503 | 9.51263  | -4.44483 | 495 |
| TC1400002 Gm3252   | ENSMUST0 cdna:putat ENSEMBL | 6.489627 | 8.640009 | -4.43945 | 496 |
| TC1200001 Rapgef5  | NM_17593 "Mus musc RefSeq   | 6.943552 | 9.093857 | -4.43922 | 497 |
| TC0600000 Gimap8   | NM_00107 "Mus musc RefSeq   | 5.34222  | 7.490995 | -4.43451 | 498 |
| TC0X00000 Lonrf3   | NM_02889 "Mus musc RefSeq   | 6.739442 | 4.591385 | 4.432305 | 499 |
| TC0900000 Sema7a   | NM_01135 "Mus musc RefSeq   | 7.935817 | 10.0831  | -4.42994 | 500 |
| TC1400002 Gm3173   | XM_00308 "PREDICTEI RefSeq  | 5.901681 | 8.048826 | -4.4295  | 501 |
| TC0900002 Me1      | NM_00119 "Mus musc RefSeq   | 7.227889 | 5.082836 | 4.423085 | 502 |
| TC0900001 Fam198a  | NM_17774 "Mus musc RefSeq   | 6.408027 | 4.263944 | 4.420112 | 503 |
| TC0700004 Gvin1    | NM_00103 "Mus musc RefSeq   | 7.589533 | 9.733027 | -4.41831 | 504 |
| TC1400000 Gm3532   | ENSMUST0 cdna:putat ENSEMBL | 4.084225 | 6.224471 | -4.40837 | 505 |
| TC0400003 Nbl1     | NM_00867 "Mus musc RefSeq   | 8.277474 | 6.139621 | 4.401066 | 506 |
| TC1700002 Efna5    | NM_20765 "Mus musc RefSeq   | 6.297813 | 4.160122 | 4.400572 | 507 |
| TC0600000 Dysf     | NM_00107 "Mus musc RefSeq   | 6.66012  | 8.793605 | -4.38776 | 508 |
| TC0300001 Emcn     | NM_00116 "Mus musc RefSeq   | 8.589047 | 10.72196 | -4.38601 | 509 |
| TC0300001 Negr1    | NM_17727 "Mus musc RefSeq   | 6.882869 | 4.753666 | 4.374757 | 510 |
| TC0600001 Pon3     | NM_17300 "Mus musc RefSeq   | 7.526896 | 5.39824  | 4.373099 | 511 |
| TC1000002 Tspan15  | NM_19799 "Mus musc RefSeq   | 6.350727 | 8.479347 | -4.37299 | 512 |
| TC0400003 Tie1     | NM_01158 "Mus musc RefSeq   | 8.192481 | 10.31926 | -4.36742 | 513 |
| TC1600000 Itgb5    | NM_01058 "Mus musc RefSeq   | 9.651452 | 7.526703 | 4.361272 | 514 |
| TC0200005 Sox18    | NM_00923 "Mus musc RefSeq   | 8.037371 | 10.16181 | -4.36034 | 515 |
| TC0900002 Col6a6   | NM_00110 "Mus musc RefSeq   | 7.409907 | 5.289074 | 4.34945  | 516 |

|                    |                              |          |          |          |     |
|--------------------|------------------------------|----------|----------|----------|-----|
| TC0900002 Trpc1    | NM_01164 "Mus musc RefSeq    | 5.761642 | 3.641554 | 4.347205 | 517 |
| TC0900000 Mcam     | NM_02306 "Mus musc RefSeq    | 7.71827  | 9.838311 | -4.34706 | 518 |
| TC1900000 Exoc6    | NM_17535 "Mus musc RefSeq    | 6.811528 | 8.929842 | -4.34186 | 519 |
| TC0700000 Ssc5d    | NM_17300 "Mus musc RefSeq    | 7.923226 | 5.806853 | 4.336025 | 520 |
| TC0900002 Pik3cb   | NM_02909 "Mus musc RefSeq    | 5.893478 | 8.009399 | -4.33467 | 521 |
| TC0200002 Ccm2l    | NM_14553 "Mus musc RefSeq    | 7.247972 | 9.362985 | -4.33194 | 522 |
| TC1200001 Pqlc3    | NM_17257 "Mus musc RefSeq    | 7.678662 | 5.564211 | 4.330252 | 523 |
| TC0700001 Nox4     | NM_00128 "NADPH ox RefSeq    | 5.815526 | 3.701738 | 4.328263 | 524 |
| TC0600000 Gimap9   | NM_17496 "Mus musc RefSeq    | 3.50301  | 5.616629 | -4.32776 | 525 |
| TC0600002 Arhgap25 | NM_17547 "Mus musc RefSeq    | 5.246263 | 7.359673 | -4.32713 | 526 |
| TC1700001 Epb4.1l3 | NM_01381 "Mus musc RefSeq    | 6.462853 | 4.349655 | 4.326493 | 527 |
| TC1100002 Sgcd     | NM_01189 "Mus musc RefSeq    | 5.91327  | 3.802318 | 4.319763 | 528 |
| TC0X00000 Shroom4  | NM_00104 "Mus musc RefSeq    | 6.905437 | 9.013782 | -4.31196 | 529 |
| TC0700002 Cyp2e1   | NM_02128 "Mus musc RefSeq    | 6.149377 | 4.041717 | 4.309917 | 530 |
| TC1400002 Gm3558   | NM_00127 "Mus musc RefSeq    | 5.917682 | 8.023103 | -4.30323 | 531 |
| TC1800001 Ablim3   | NM_19864 "Mus musc RefSeq    | 8.5625   | 10.66593 | -4.2973  | 532 |
| TC0200001 Rapgef4  | NM_00120 "Mus musc RefSeq    | 4.893285 | 6.99194  | -4.2831  | 533 |
| TC1000000 Icosl    | NM_01579 "Mus musc RefSeq    | 8.036028 | 5.939163 | 4.277788 | 534 |
| TC1100003 Prkca    | NM_01110 "Mus musc RefSeq    | 7.00029  | 4.906286 | 4.269313 | 535 |
| TC1100003 Fam101b  | NM_02965 "Mus musc RefSeq    | 8.033611 | 10.12666 | -4.26649 | 536 |
| TC1500002 Plxnb2   | NM_00115 "Mus musc RefSeq    | 7.825556 | 5.735963 | 4.25628  | 537 |
| TC0200000 Apbb1ip  | NM_01945 "Mus musc RefSeq    | 6.292662 | 4.204355 | 4.252488 | 538 |
| TC0200003 Zeb2     | NM_00128 "zinc finger RefSeq | 6.845475 | 4.760655 | 4.242222 | 539 |
| TC0300001 Fabp4    | NM_02440 "Mus musc RefSeq    | 9.288854 | 11.37322 | -4.24087 | 540 |
| TC1800001 Lox      | NM_00128 "lysyl oxida RefSeq | 6.510979 | 4.427118 | 4.239403 | 541 |
| TC0700000 Ptgir    | NM_00896 "Mus musc RefSeq    | 7.130415 | 5.047556 | 4.236459 | 542 |
| TC0700001 Pde2a    | NM_00114 "Mus musc RefSeq    | 8.12721  | 10.20869 | -4.23241 | 543 |
| TC1300001 Txndc5   | NM_00128 "thioredoxi RefSeq  | 9.270203 | 7.189489 | 4.230165 | 544 |
| TC0700000 Gpr4     | NM_17566 "Mus musc RefSeq    | 7.189479 | 9.27013  | -4.22998 | 545 |
| TC0600001 Mgst1    | NM_01994 "Mus musc RefSeq    | 6.856495 | 4.776575 | 4.227838 | 546 |
| TC1100003 Bcl6b    | NM_00752 "Mus musc RefSeq    | 6.98597  | 9.063844 | -4.22185 | 547 |
| TC1100001 Car4     | NM_00760 "Mus musc RefSeq    | 7.62462  | 9.700875 | -4.21711 | 548 |
| TC1000003 Rassf3   | NM_13895 "Mus musc RefSeq    | 7.181829 | 9.255113 | -4.20844 | 549 |
| TC1200001 Tspan13  | NM_02535 "Mus musc RefSeq    | 7.919418 | 9.990036 | -4.20067 | 550 |
| TC1400001 Gm3500   | ENSMUST0cdna:putat ENSEMBL   | 5.984351 | 8.053999 | -4.19784 | 551 |
| TC1400002 Ndrp2    | NM_00114 "Mus musc RefSeq    | 9.253188 | 7.184386 | 4.195381 | 552 |
| TC1400002 Scara3   | NM_17260 "Mus musc RefSeq    | 6.855938 | 4.78721  | 4.195166 | 553 |
| TC0400000 EphA7    | NM_00112 "Mus musc RefSeq    | 5.907887 | 3.839219 | 4.194992 | 554 |
| TC0200001 Trp53i11 | NM_00102 "Mus musc RefSeq    | 8.063217 | 10.13088 | -4.19206 | 555 |
| TC1800000 Pdgfrb   | NM_00114 "Mus musc RefSeq    | 9.599476 | 7.532246 | 4.190813 | 556 |
| TC1700000 Clic5    | NM_17262 "Mus musc RefSeq    | 8.360705 | 10.42756 | -4.18973 | 557 |
| TC1400000 C1qtnf9  | NM_18317 "Mus musc RefSeq    | 7.788089 | 9.85443  | -4.18823 | 558 |
| TC0800002 Ushbp1   | NM_18141 "Mus musc RefSeq    | 6.949049 | 9.011068 | -4.1757  | 559 |
| TC0200002 Ppp1r16b | NM_15308 "Mus musc RefSeq    | 6.64345  | 8.704345 | -4.17245 | 560 |
| TC0400000 Lyn      | NM_00111 "Mus musc RefSeq    | 6.620972 | 8.679628 | -4.16598 | 561 |
| TC1000002 Prdm1    | NM_00754 "Mus musc RefSeq    | 4.467769 | 6.524682 | -4.16095 | 562 |
| TC0700003 Thrsp    | NM_00938 "Mus musc RefSeq    | 5.861492 | 7.917593 | -4.15861 | 563 |

|                     |                                  |          |          |          |     |
|---------------------|----------------------------------|----------|----------|----------|-----|
| TC1400001422.mm.1   | uc007sdy.1 "alpha43-t; UCSC Gene | 5.268383 | 7.320926 | -4.14837 | 564 |
| TC0800000 Hmox1     | NM_01044 "Mus musc RefSeq        | 9.462677 | 7.410717 | 4.146689 | 565 |
| TC1100002 Gm12185   | NM_00104 "Mus musc RefSeq        | 6.61688  | 8.668403 | -4.14543 | 566 |
| TC0200003 Ggta1     | NM_00114 "Mus musc RefSeq        | 6.102496 | 8.153398 | -4.14365 | 567 |
| TC1700000 Kank3     | NM_03069 "Mus musc RefSeq        | 7.137968 | 9.186007 | -4.13544 | 568 |
| TC1000002 Glt8d2    | NM_02910 "Mus musc RefSeq        | 6.399286 | 4.35223  | 4.132618 | 569 |
| TC1400002 Gm10406   | NM_00116 "Mus musc RefSeq        | 5.588905 | 7.635497 | -4.13129 | 570 |
| TC1200001 Rin3      | NM_17762 "Mus musc RefSeq        | 6.053404 | 8.099956 | -4.13117 | 571 |
| TC1100003 Spns2     | NM_00127 "Mus musc RefSeq        | 6.661152 | 8.707454 | -4.13046 | 572 |
| TC1100002 Ccdc85a   | NM_00116 "Mus musc RefSeq        | 5.824889 | 7.870969 | -4.12982 | 573 |
| TC0900000 Pdgfd     | NM_02792 "Mus musc RefSeq        | 7.492661 | 9.53772  | -4.1269  | 574 |
| TC1500000 Fzd6      | NM_00116 "Mus musc RefSeq        | 6.815885 | 8.860856 | -4.12665 | 575 |
| TC0500000 Rasl11b   | NM_02687 "Mus musc RefSeq        | 7.749743 | 5.706059 | 4.12297  | 576 |
| TC1400000 Sema3g    | NM_00102 "Mus musc RefSeq        | 6.007821 | 8.050647 | -4.12052 | 577 |
| TC0300001 Arsj      | NM_17345 "Mus musc RefSeq        | 5.770847 | 3.72814  | 4.120179 | 578 |
| TC0200000 Pkp4      | NM_02636 "Mus musc RefSeq        | 7.25055  | 9.293219 | -4.12007 | 579 |
| TC0500003 Flt1      | NM_01022 "Mus musc RefSeq        | 8.849695 | 10.89171 | -4.11821 | 580 |
| TC0700002 Bcam      | NM_02048 "Mus musc RefSeq        | 7.728507 | 9.770509 | -4.11817 | 581 |
| TSUnmapp Cd83       | NM_00128 "CD83 anti; RefSeq      | 6.727712 | 4.686867 | 4.114865 | 582 |
| TC0500003 Scarb1    | NM_00120 "Mus musc RefSeq        | 6.777017 | 8.817847 | -4.11482 | 583 |
| TC1100000 Pmp22     | NM_00888 "Mus musc RefSeq        | 10.64494 | 8.604355 | 4.11412  | 584 |
| TC1200000 Galnt16   | NM_00108 "Mus musc RefSeq        | 6.816869 | 4.777218 | 4.111461 | 585 |
| TC1400001 Gm8237    | ENSMUST0 cdna:putat ENSEMBL      | 5.579947 | 7.617453 | -4.10535 | 586 |
| TC0100003 Gm16340   | XM_00308 "PREDICTEI RefSeq       | 7.667882 | 9.699055 | -4.08737 | 587 |
| TC1200001 Clec14a   | NM_02580 "Mus musc RefSeq        | 5.673287 | 7.703499 | -4.08465 | 588 |
| TC0900000 Nxpe4     | NM_17292 "Mus musc RefSeq        | 6.185746 | 8.215783 | -4.08415 | 589 |
| TC1300000 Akr1c14   | NM_13407 "Mus musc RefSeq        | 5.18681  | 7.215397 | -4.08005 | 590 |
| TC1800001 Arhgap26  | NM_17516 "Mus musc RefSeq        | 5.504423 | 7.532906 | -4.07976 | 591 |
| TC1000002 Man1a     | NM_00854 "Mus musc RefSeq        | 9.210954 | 7.185753 | 4.070486 | 592 |
| TC0300000 Sh3d19    | NM_00108 "Mus musc RefSeq        | 8.644668 | 6.620957 | 4.066284 | 593 |
| TC1900000 Ppp1r14b  | NM_00888 "Mus musc RefSeq        | 8.507485 | 6.485613 | 4.061104 | 594 |
| TC1500000 Sema5a    | NM_00915 "Mus musc RefSeq        | 6.702597 | 4.687331 | 4.042551 | 595 |
| TC0100003 Al607873  | NM_00120 "Mus musc RefSeq        | 9.130141 | 7.117258 | 4.035879 | 596 |
| TC0100001 Rgs16     | NM_01126 "Mus musc RefSeq        | 6.502544 | 8.514505 | -4.0333  | 597 |
| TC0600002 Podxl     | NM_01372 "Mus musc RefSeq        | 8.730446 | 10.74141 | -4.03051 | 598 |
| TC0300002 BC028528  | NM_15351 "Mus musc RefSeq        | 5.58246  | 7.592649 | -4.02835 | 599 |
| TC1600000 Cldn5     | NM_01380 "Mus musc RefSeq        | 7.600229 | 9.610172 | -4.02766 | 600 |
| TC0200002 Itih2     | NM_01058 "Mus musc RefSeq        | 5.878108 | 3.868363 | 4.02711  | 601 |
| TC1400001 Gfra2     | NM_00811 "Mus musc RefSeq        | 6.668266 | 4.660679 | 4.021091 | 602 |
| TC0800002 Ifi30     | NM_02306 "Mus musc RefSeq        | 8.533188 | 6.526268 | 4.019232 | 603 |
| TC0400000 Acer2     | NM_13930 "Mus musc RefSeq        | 6.272257 | 8.274539 | -4.00633 | 604 |
| TC0500003 Hspb8     | NM_03070 "Mus musc RefSeq        | 7.809381 | 5.807644 | 4.004819 | 605 |
| TC0400003 Tinagl1   | NM_00116 "Mus musc RefSeq        | 7.168042 | 9.167894 | -3.99959 | 606 |
| TC1100004 9930111J2 | NM_00111 "Mus musc RefSeq        | 6.419883 | 8.416406 | -3.99037 | 607 |
| TC0800001 Mmp15     | NM_00860 "Mus musc RefSeq        | 7.477737 | 9.473916 | -3.98942 | 608 |
| TC0700000 Slc1a5    | NM_00920 "Mus musc RefSeq        | 8.691047 | 6.696415 | 3.985144 | 609 |
| TC0600001 Cecr2     | NM_00112 "Mus musc RefSeq        | 5.245179 | 7.239141 | -3.98329 | 610 |

|                     |                            |          |          |          |     |
|---------------------|----------------------------|----------|----------|----------|-----|
| TC1400000 Gm8271    | XM_98577 "PREDICTEI RefSeq | 4.072124 | 6.063965 | -3.97744 | 611 |
| TC1100003 Ntn1      | NM_00874 "Mus musc RefSeq  | 8.874011 | 6.889975 | 3.955982 | 612 |
| TC0200000 Cercam    | NM_20729 "Mus musc RefSeq  | 7.161932 | 5.179253 | 3.952263 | 613 |
| TC0300000 Nes       | NM_01670 "Mus musc RefSeq  | 6.379932 | 8.361745 | -3.94989 | 614 |
| TC0600002 Adamts9   | NM_17531 "Mus musc RefSeq  | 7.174805 | 9.155716 | -3.94742 | 615 |
| TC0600000 Loxl3     | NM_01358 "Mus musc RefSeq  | 6.919868 | 4.939767 | 3.945207 | 616 |
| TC1500000 Dennd3    | NM_00108 "Mus musc RefSeq  | 6.240912 | 8.218893 | -3.93941 | 617 |
| TC1100001 Coro6     | NM_13912 "Mus musc RefSeq  | 6.723925 | 8.699787 | -3.93363 | 618 |
| TC1200002 Jag2      | NM_01058 "Mus musc RefSeq  | 7.590755 | 9.566197 | -3.93249 | 619 |
| TSUnmapp Rora       | NM_00128 "RAR-relat RefSeq | 8.017058 | 6.045063 | 3.923102 | 620 |
| TC0300003 Lphn2     | NM_00108 "Mus musc RefSeq  | 6.810815 | 8.782295 | -3.9217  | 621 |
| TC1400002 Adcy4     | NM_08043 "Mus musc RefSeq  | 7.313784 | 9.285084 | -3.92121 | 622 |
| TC0200003 Stom      | NM_01351 "Mus musc RefSeq  | 7.032519 | 9.003495 | -3.92033 | 623 |
| TC1800000 Sncaip    | NM_00119 "Mus musc RefSeq  | 5.416858 | 7.387177 | -3.91855 | 624 |
| TC0400003 2610305D1 | NM_14507 "Mus musc RefSeq  | 6.194016 | 8.162921 | -3.91471 | 625 |
| TC0800000 D8Ertd82e | NM_17291 "Mus musc RefSeq  | 6.363889 | 8.332679 | -3.9144  | 626 |
| TC1100001 Adap2     | NM_17213 "Mus musc RefSeq  | 7.703991 | 5.736362 | 3.911248 | 627 |
| TC0100000 Xrcc5     | NM_00953 "Mus musc RefSeq  | 5.692978 | 3.726784 | 3.90736  | 628 |
| TC1800000 Lama3     | NM_01068 "Mus musc RefSeq  | 5.053465 | 7.019546 | -3.90705 | 629 |
| TC0500000 Cyt11     | NM_00108 "Mus musc RefSeq  | 9.394667 | 7.428748 | 3.906615 | 630 |
| TC0200005 Sdc4      | NM_01152 "Mus musc RefSeq  | 6.920483 | 4.954756 | 3.906095 | 631 |
| TC0600001 Slc6a6    | NM_00932 "Mus musc RefSeq  | 8.24641  | 10.2075  | -3.89355 | 632 |
| TC0200001 Itgav     | NM_00840 "Mus musc RefSeq  | 8.248762 | 6.292297 | 3.881098 | 633 |
| TC0X00002 Mtap7d3   | NM_17729 "Mus musc RefSeq  | 5.214694 | 3.258414 | 3.880601 | 634 |
| TC0300001 Eltd1     | NM_13322 "Mus musc RefSeq  | 8.894864 | 10.85059 | -3.87912 | 635 |
| TC1300002 Rhobtb3   | NM_02849 "Mus musc RefSeq  | 6.618176 | 4.662451 | 3.879108 | 636 |
| TC0100002 Pam       | NM_01362 "Mus musc RefSeq  | 9.73038  | 7.775074 | 3.877982 | 637 |
| TC0100002 Steap3    | NM_13318 "Mus musc RefSeq  | 6.992749 | 5.037515 | 3.877788 | 638 |
| TC0600000 Flnc      | NM_00108 "Mus musc RefSeq  | 7.507842 | 5.553737 | 3.874755 | 639 |
| TC1200002 Ppp1r13b  | NM_01162 "Mus musc RefSeq  | 7.070798 | 9.024848 | -3.87461 | 640 |
| TC0900000 Casp1     | NM_00980 "Mus musc RefSeq  | 4.241741 | 6.195397 | -3.87355 | 641 |
| TC0400000 Nr4a3     | NM_01574 "Mus musc RefSeq  | 8.230714 | 6.277218 | 3.873119 | 642 |
| TC1300001 Lrrc16a   | NM_02682 "Mus musc RefSeq  | 6.481943 | 4.530327 | 3.868076 | 643 |
| TC0300002 Fnbp1l    | NM_15311 "Mus musc RefSeq  | 6.740664 | 8.692184 | -3.86782 | 644 |
| TC0900001 Myo5a     | NM_01086 "Mus musc RefSeq  | 6.410148 | 4.459637 | 3.865114 | 645 |
| TC0200003 Pla2r1    | NM_00886 "Mus musc RefSeq  | 5.832213 | 3.882037 | 3.864217 | 646 |
| TC0600001 Mgl1      | NM_01184 "Mus musc RefSeq  | 7.9179   | 9.867882 | -3.8637  | 647 |
| TC0700001 Ucp2      | NM_01167 "Mus musc RefSeq  | 7.156424 | 9.105203 | -3.86048 | 648 |
| TC0500000 Cxcl2     | NM_00914 "Mus musc RefSeq  | 7.21829  | 5.269522 | 3.860447 | 649 |
| TC1100003 Pecam1    | NM_00103 "Mus musc RefSeq  | 8.626008 | 10.57252 | -3.85441 | 650 |
| TC1000001 Ptprb     | NM_02992 "Mus musc RefSeq  | 9.312787 | 11.25839 | -3.85199 | 651 |
| TC1600001 Cd200     | NM_01081 "Mus musc RefSeq  | 7.342591 | 9.281214 | -3.8334  | 652 |
| TC0700004 Sult1a1   | NM_13367 "Mus musc RefSeq  | 7.45224  | 9.390014 | -3.83114 | 653 |
| TC0100001 Fam129a   | NM_02201 "Mus musc RefSeq  | 8.147407 | 6.209837 | 3.830599 | 654 |
| TC0900000 Vsig2     | NM_02051 "Mus musc RefSeq  | 6.306069 | 8.242873 | -3.82857 | 655 |
| TC0600001 Ica1      | NM_00125 "Mus musc RefSeq  | 5.062598 | 6.998106 | -3.82513 | 656 |
| TC1100000 Pik3r6    | NM_00100 "Mus musc RefSeq  | 5.973959 | 7.909165 | -3.82433 | 657 |

|                     |                                |          |          |          |     |
|---------------------|--------------------------------|----------|----------|----------|-----|
| TC0900002 Fam46a    | NM_00116 "Mus musc RefSeq      | 6.882707 | 4.948593 | 3.821434 | 658 |
| TC1100003 Dgke      | NM_01950 "Mus musc RefSeq      | 5.151161 | 7.084694 | -3.8199  | 659 |
| TC1900000 Plce1     | NM_01958 "Mus musc RefSeq      | 6.928008 | 4.995342 | 3.8176   | 660 |
| TC1500001 Mtss1     | NM_00114 "Mus musc RefSeq      | 6.302588 | 8.23144  | -3.80752 | 661 |
| TC1500001 Mfng      | NM_00859 "Mus musc RefSeq      | 5.941147 | 7.869814 | -3.80703 | 662 |
| TC1500000 Myo10     | NM_01947 "Mus musc RefSeq      | 8.12806  | 10.05431 | -3.80066 | 663 |
| TC0100000 Il1rl2    | NM_13319 "Mus musc RefSeq      | 6.601445 | 4.679626 | 3.789005 | 664 |
| TC0900002 Tspan3    | NM_01979 "Mus musc RefSeq      | 8.675427 | 6.756628 | 3.781082 | 665 |
| TC1100002 9930111J2 | NM_17343 "Mus musc RefSeq      | 6.920728 | 8.836007 | -3.77187 | 666 |
| TC1100001 Fkbp10    | NM_00116 "Mus musc RefSeq      | 8.492075 | 6.576841 | 3.77175  | 667 |
| TC1200001 Tnfaip2   | NM_00939 "Mus musc RefSeq      | 7.455571 | 5.54049  | 3.77135  | 668 |
| TC1700002 Emilin2   | NM_14515 "Mus musc RefSeq      | 6.603911 | 4.690439 | 3.767146 | 669 |
| TC1900001 Aldh18a1  | NM_15355 "Mus musc RefSeq      | 7.255342 | 5.343256 | 3.763529 | 670 |
| TC0100000 Sdpr      | NM_13874 "Mus musc RefSeq      | 8.888308 | 10.79406 | -3.74703 | 671 |
| TC0100000 Nrp2      | NM_00107 "Mus musc RefSeq      | 7.807642 | 9.712002 | -3.74343 | 672 |
| TC0700000 Nova2     | NM_00102 "Mus musc RefSeq      | 6.239198 | 8.140535 | -3.73559 | 673 |
| TC0500003 Gbp9      | NM_17277 "Mus musc RefSeq      | 8.14701  | 10.04827 | -3.7354  | 674 |
| TC0200004 Foxs1     | NM_01022 "Mus musc RefSeq      | 7.505862 | 5.606825 | 3.729642 | 675 |
| TC0800002 Ces1d     | NM_05320 "Mus musc RefSeq      | 5.846298 | 3.947744 | 3.728393 | 676 |
| TC0900001 Mst1r     | NM_00907 "Mus musc RefSeq      | 6.552412 | 4.655879 | 3.723174 | 677 |
| TC1100003 Abi3      | NM_02565 "Mus musc RefSeq      | 5.985415 | 7.880374 | -3.71911 | 678 |
| TC0200002 Plcb4     | NM_01382 "Mus musc RefSeq      | 7.64082  | 9.535435 | -3.71823 | 679 |
| TC0200001 Wt1       | NM_14478 "Mus musc RefSeq      | 5.910618 | 7.804765 | -3.71702 | 680 |
| TC0400001 Rex2      | NM_00117 "Mus musc RefSeq      | 5.862242 | 7.754966 | -3.71336 | 681 |
| TC0200004 Duoxa1    | NM_14539 "Mus musc RefSeq      | 6.842638 | 4.950766 | 3.711165 | 682 |
| TC1100003 Icam2     | NM_01049 "Mus musc RefSeq      | 5.811765 | 7.70347  | -3.71074 | 683 |
| TC0700002 LOC100862 | XM_00368 "PREDICTEI MGI/Jacksc | 6.880693 | 8.771577 | -3.70862 | 684 |
| TC0X00003 Maged2    | NM_00119 "Mus musc RefSeq      | 7.978608 | 6.08856  | 3.706476 | 685 |
| TC1400001 Gm8050    | XM_00308 "PREDICTEI RefSeq     | 4.754637 | 6.643633 | -3.70377 | 686 |
| TC0600003 Bhlhe41   | NM_02446 "Mus musc RefSeq      | 6.231255 | 4.343578 | 3.700389 | 687 |
| TC0600003 Gimap5    | NM_17503 "Mus musc RefSeq      | 4.722452 | 6.60926  | -3.69816 | 688 |
| TC0900001 Gk5       | NM_17735 "Mus musc RefSeq      | 6.629787 | 4.743733 | 3.696229 | 689 |
| TC1100004 Cygb      | NM_03020 "Mus musc RefSeq      | 9.623008 | 7.73756  | 3.694676 | 690 |
| TC0900002 Nnmt      | NM_01092 "Mus musc RefSeq      | 6.194697 | 4.309311 | 3.694518 | 691 |
| TC1400001 Stab1     | NM_13867 "Mus musc RefSeq      | 6.20508  | 8.089871 | -3.69299 | 692 |
| TC0100000 Gm9994    | NM_00120 "Mus musc RefSeq      | 7.126907 | 5.242493 | 3.692029 | 693 |
| TC0X00000 Bgn       | NM_00754 "Mus musc RefSeq      | 11.45118 | 9.567532 | 3.690075 | 694 |
| TC0100000 Inpp5d    | NM_01056 "Mus musc RefSeq      | 5.13881  | 7.021172 | -3.68678 | 695 |
| TC1700002 C4b       | NM_00978 "Mus musc RefSeq      | 6.71874  | 4.836391 | 3.686748 | 696 |
| TC0400004 Mmp23     | NM_01198 "Mus musc RefSeq      | 7.224533 | 5.343928 | 3.682294 | 697 |
| TC1900000 Entpd1    | NM_00984 "Mus musc RefSeq      | 6.200724 | 8.078316 | -3.67461 | 698 |
| TC1100000 Gas7      | NM_00808 "Mus musc RefSeq      | 6.492656 | 4.61711  | 3.669405 | 699 |
| TC1400000 Adk       | NM_13407 "Mus musc RefSeq      | 6.929621 | 5.055427 | 3.665968 | 700 |
| TC1200000 Meox2     | NM_00858 "Mus musc RefSeq      | 6.808902 | 8.682841 | -3.66532 | 701 |
| TC0800000 Thsd1     | NM_01957 "Mus musc RefSeq      | 5.584012 | 7.457334 | -3.66375 | 702 |
| TC1400002 Spry2     | NM_01189 "Mus musc RefSeq      | 8.3523   | 6.479748 | 3.661797 | 703 |
| TC0500002 Arap2     | NM_17840 "Mus musc RefSeq      | 4.954812 | 6.827186 | -3.66135 | 704 |

|                     |                             |          |          |          |     |
|---------------------|-----------------------------|----------|----------|----------|-----|
| TC1000000 Arhgap18  | NM_17683 "Mus musc RefSeq   | 7.589555 | 9.458432 | -3.65248 | 705 |
| TC1400001 Gm3755    | ENSMUST0 cdna:putat ENSEMBL | 4.072683 | 5.940112 | -3.64882 | 706 |
| TC0300000 Fabp5     | NM_01063 "Mus musc RefSeq   | 5.722105 | 7.588801 | -3.64696 | 707 |
| TC1300002 Itga1     | NM_00103 "Mus musc RefSeq   | 8.019747 | 9.885859 | -3.64549 | 708 |
| TC0800000 Slc7a2    | NM_00751 "Mus musc RefSeq   | 6.346763 | 4.48229  | 3.641349 | 709 |
| TC0700002 Ceacam2   | NM_00111 "Mus musc RefSeq   | 7.08426  | 8.948382 | -3.64046 | 710 |
| TC1000002 Cdh23     | NM_02337 "Mus musc RefSeq   | 6.051384 | 7.91452  | -3.63798 | 711 |
| TC1000002 Gstt1     | NM_00818 "Mus musc RefSeq   | 8.433885 | 6.571204 | 3.636829 | 712 |
| TC0X00000 Tspan7    | NM_01963 "Mus musc RefSeq   | 9.550197 | 11.41012 | -3.62987 | 713 |
| TC0500000 Kit       | NM_00112 "Mus musc RefSeq   | 5.028972 | 6.887492 | -3.62636 | 714 |
| TC1600001 Alcam     | NM_00965 "Mus musc RefSeq   | 5.991271 | 4.135899 | 3.61845  | 715 |
| TC1800001 Sema6a    | NM_01874 "Mus musc RefSeq   | 7.936245 | 9.791451 | -3.61803 | 716 |
| TC0400000 Unc13b    | NM_00108 "Mus musc RefSeq   | 5.768184 | 7.623287 | -3.61778 | 717 |
| TC1000001 Epyc      | NM_00788 "Mus musc RefSeq   | 5.014399 | 3.163133 | 3.608167 | 718 |
| TC1700002 Ptprs     | NM_00125 "Mus musc RefSeq   | 8.365866 | 6.516004 | 3.604657 | 719 |
| TC1300000 Arrdc3    | NM_00104 "Mus musc RefSeq   | 8.50894  | 6.659193 | 3.60437  | 720 |
| TC0200002 Itga8     | NM_00100 "Mus musc RefSeq   | 6.222319 | 4.374153 | 3.600422 | 721 |
| TC0400000 LOC100861 | XM_00368 "PREDICTEI RefSeq  | 7.066457 | 5.218317 | 3.600357 | 722 |
| TC0400000 Gm2564    | XM_00147 "PREDICTEI RefSeq  | 7.164872 | 5.316733 | 3.600355 | 723 |
| TC4_JH584 CR974586  | ENSMUST0 cdna:novel ENSEMBL | 6.898593 | 5.050454 | 3.600355 | 723 |
| TC0300002 Efna1     | NM_01010 "Mus musc RefSeq   | 7.234004 | 9.081153 | -3.59789 | 725 |
| TC1600000 Ahsg      | NM_01346 "Mus musc RefSeq   | 6.706879 | 4.860234 | 3.596628 | 726 |
| TC0600001 Emp1      | NM_01012 "Mus musc RefSeq   | 10.27013 | 8.424067 | 3.595185 | 727 |
| TC0100003 Pydc4     | NM_00117 "Mus musc RefSeq   | 3.800287 | 5.644632 | -3.5909  | 728 |
| TC1100001 Ace       | NM_20762 "Mus musc RefSeq   | 10.41822 | 8.574012 | 3.590558 | 729 |
| TC0X00003 Kctd12b   | NM_17542 "Mus musc RefSeq   | 6.267896 | 8.106967 | -3.5778  | 730 |
| TC0200001 Slc43a1   | NM_00108 "Mus musc RefSeq   | 7.175943 | 5.337261 | 3.576831 | 731 |
| TC1300002 Snx18     | NM_13079 "Mus musc RefSeq   | 8.425802 | 6.587266 | 3.576469 | 732 |
| TC0600002 Plxnd1    | NM_02637 "Mus musc RefSeq   | 8.804252 | 10.64187 | -3.57419 | 733 |
| TC0300000 Gja5      | NM_00127 "Mus musc RefSeq   | 5.266629 | 7.103857 | -3.57323 | 734 |
| TC0500000 Slc4a4    | NM_00113 "Mus musc RefSeq   | 6.008198 | 4.172754 | 3.568812 | 735 |
| TC0300001 Sec24d    | NM_02713 "Mus musc RefSeq   | 8.832472 | 6.997408 | 3.567872 | 736 |
| TC0800001 Rasa3     | NM_00902 "Mus musc RefSeq   | 8.209988 | 6.375978 | 3.565267 | 737 |
| TC0600002 Dennd2a   | NM_17247 "Mus musc RefSeq   | 6.78082  | 4.948172 | 3.561902 | 738 |
| TC1400002 Rgcc      | NM_02542 "Mus musc RefSeq   | 8.524854 | 10.3539  | -3.55301 | 739 |
| TC0200005 Egfl7     | NM_17844 "Mus musc RefSeq   | 7.318739 | 9.147287 | -3.55179 | 740 |
| TC1600001 Gp1bb     | NM_01032 "Mus musc RefSeq   | 7.426983 | 5.598973 | 3.55047  | 741 |
| TC0600003 Mansc1    | NM_02634 "Mus musc RefSeq   | 6.087177 | 7.91414  | -3.54789 | 742 |
| TC0600002 Lrig1     | NM_00837 "Mus musc RefSeq   | 7.289636 | 5.465094 | 3.541945 | 743 |
| TC1400001 Gm2244    | XM_00147 "PREDICTEI RefSeq  | 4.390039 | 6.213528 | -3.53936 | 744 |
| TC1400000 Gm3278    | XM_00147 "PREDICTEI RefSeq  | 4.34218  | 6.165668 | -3.53936 | 745 |
| TC1400000 Tnfrsf10b | NM_02027 "Mus musc RefSeq   | 5.547969 | 7.369462 | -3.53447 | 746 |
| TC0500003 Eln       | NM_00792 "Mus musc RefSeq   | 9.097499 | 7.276485 | 3.533294 | 747 |
| TC0400002 Car8      | NM_00759 "Mus musc RefSeq   | 6.977909 | 8.798872 | -3.53317 | 748 |
| TC1400002 Dgkh      | NM_00125 "diacylglyc RefSeq | 5.897746 | 7.717724 | -3.53076 | 749 |
| TC0100002 Hecw2     | NM_00100 "Mus musc RefSeq   | 6.432998 | 8.251975 | -3.52831 | 750 |
| TC1500000 Dap       | NM_14605 "Mus musc RefSeq   | 9.641358 | 7.826568 | 3.518084 | 751 |



|                     |                            |          |          |          |     |
|---------------------|----------------------------|----------|----------|----------|-----|
| TC1500000 Gpihbp1   | NM_02673 "Mus musc RefSeq  | 9.315295 | 11.12809 | -3.51323 | 752 |
| TC0100003 Pcp4l1    | NM_02555 "Mus musc RefSeq  | 6.506325 | 8.316781 | -3.50753 | 753 |
| TC1900000 1810055G  | NM_02807 "Mus musc RefSeq  | 7.686607 | 5.876907 | 3.505694 | 754 |
| TC0300002 Gpsm2     | NM_02952 "Mus musc RefSeq  | 5.628934 | 3.82091  | 3.501624 | 755 |
| TC0400001 Heyl      | NM_01390 "Mus musc RefSeq  | 8.024878 | 6.218208 | 3.498339 | 756 |
| TC0600003 Leprel2   | NM_01353 "Mus musc RefSeq  | 7.673265 | 5.866665 | 3.498169 | 757 |
| TC0400001 Zfp600    | NM_00117 "Mus musc RefSeq  | 5.265429 | 7.071439 | -3.49674 | 758 |
| TC1500002 Zfp385a   | NM_01386 "Mus musc RefSeq  | 8.052419 | 6.248808 | 3.490929 | 759 |
| TC0700004 GM8989    | ENSMUST0cdna:know ENSEMBL  | 5.456032 | 7.259488 | -3.49055 | 760 |
| TC1800000 483340311 | NM_02900 "Mus musc RefSeq  | 5.233803 | 3.431529 | 3.487695 | 761 |
| TC1800000 ligp1     | NM_02179 "Mus musc RefSeq  | 5.876206 | 7.678157 | -3.48692 | 762 |
| TC0200002 Hspa12b   | NM_02830 "Mus musc RefSeq  | 7.566218 | 9.367924 | -3.48632 | 763 |
| TC1800000 Apcdd1    | NM_13323 "Mus musc RefSeq  | 7.475742 | 5.676829 | 3.47958  | 764 |
| TC0X00001 Col4a5    | NM_00773 "Mus musc RefSeq  | 6.262047 | 4.464309 | 3.476747 | 765 |
| TC0500002 Lnx1      | NM_00115 "Mus musc RefSeq  | 5.60033  | 7.397901 | -3.47634 | 766 |
| TC0600003 Zfp9      | NM_01176 "Mus musc RefSeq  | 7.060692 | 5.264874 | 3.472123 | 767 |
| TC1800000 Rnf125    | NM_02630 "Mus musc RefSeq  | 6.92385  | 8.718054 | -3.46824 | 768 |
| TC1200002 Serpina3c | NM_00845 "Mus musc RefSeq  | 5.059545 | 3.267366 | 3.463376 | 769 |
| TC0700004 Galnt18   | NM_17373 "Mus musc RefSeq  | 6.189117 | 7.978189 | -3.45593 | 770 |
| TC0400001 Gm13145   | ENSMUST0cdna:novel ENSEMBL | 5.841904 | 7.627799 | -3.44832 | 771 |
| TC0X00003 Reps2     | NM_17825 "Mus musc RefSeq  | 6.165912 | 4.384307 | 3.438084 | 772 |
| TC0600001 Fgd5      | NM_17273 "Mus musc RefSeq  | 7.009678 | 8.789437 | -3.43369 | 773 |
| TC1400002 Gata4     | NM_00809 "Mus musc RefSeq  | 7.395132 | 5.615617 | 3.433107 | 774 |
| TC1400002 Gm8206    | ENSMUST0cdna:putat ENSEMBL | 5.106857 | 6.88637  | -3.4331  | 775 |
| TC1200000 Dock4     | NM_17280 "Mus musc RefSeq  | 6.437785 | 8.21583  | -3.42961 | 776 |
| TC0500000 Art3      | NM_18172 "Mus musc RefSeq  | 5.021818 | 6.797947 | -3.42506 | 777 |
| TC4_JH584 Gm2023    | ENSMUST0cdna:know ENSEMBL  | 7.408427 | 5.632944 | 3.423526 | 778 |
| TC0500003 Gbp4      | NM_00862 "Mus musc RefSeq  | 7.726426 | 9.50166  | -3.42294 | 779 |
| TC1400000 Spata13   | NM_00103 "Mus musc RefSeq  | 5.798556 | 7.572664 | -3.42027 | 780 |
| TC1000000 Egr2      | NM_01011 "Mus musc RefSeq  | 8.790263 | 7.01695  | 3.418381 | 781 |
| TC0X00001 Figf      | NM_01021 "Mus musc RefSeq  | 5.981613 | 4.209817 | 3.414788 | 782 |
| TC1500000 Khdrbs3   | NM_01015 "Mus musc RefSeq  | 6.448648 | 4.677285 | 3.413763 | 783 |
| TC0X00000 Zc3h12b   | NM_00103 "Mus musc RefSeq  | 5.255827 | 3.48835  | 3.40458  | 784 |
| TC1100004 Fasn      | NM_00798 "Mus musc RefSeq  | 7.482739 | 5.71532  | 3.404444 | 785 |
| TC0500001 Fry       | NM_17288 "Mus musc RefSeq  | 6.756337 | 8.523006 | -3.40267 | 786 |
| TC0500002 Kdr       | NM_01061 "Mus musc RefSeq  | 9.790692 | 11.55608 | -3.39965 | 787 |
| TC1700002 Tgif1     | NM_00116 "Mus musc RefSeq  | 7.546278 | 5.781314 | 3.398655 | 788 |
| TC1100000 Scgb3a1   | NM_05403 "Mus musc RefSeq  | 4.912118 | 6.676939 | -3.39832 | 789 |
| TC1200000 Akap5     | NM_00110 "Mus musc RefSeq  | 4.572908 | 6.337678 | -3.3982  | 790 |
| TC1900000 Map4k2    | NM_00900 "Mus musc RefSeq  | 6.710745 | 8.475012 | -3.39701 | 791 |
| TC1700002 Nudt12    | NM_02649 "Mus musc RefSeq  | 5.179189 | 6.942562 | -3.39491 | 792 |
| TC1500000 Shank3    | NM_02142 "Mus musc RefSeq  | 6.770604 | 8.533467 | -3.39371 | 793 |
| TC0500001 Tbx3      | NM_19805 "Mus musc RefSeq  | 6.110752 | 7.871874 | -3.38962 | 794 |
| TC1000001 1500009L1 | NM_00114 "Mus musc RefSeq  | 6.28104  | 4.520232 | 3.388879 | 795 |
| TC0100001 Rgs5      | NM_00906 "Mus musc RefSeq  | 7.870567 | 9.631337 | -3.38879 | 796 |
| TC1900001 Pgm5      | NM_17501 "Mus musc RefSeq  | 5.128103 | 6.888394 | -3.38766 | 797 |
| TC0200000 Olfm1     | NM_00103 "Mus musc RefSeq  | 7.274078 | 5.514916 | 3.385014 | 798 |

|                     |                            |          |          |          |     |
|---------------------|----------------------------|----------|----------|----------|-----|
| TC1100004 Psme2     | ENSMUST0 cdna:know ENSEMBL | 8.26799  | 10.02632 | -3.38306 | 799 |
| TC1700000 Gpr116    | NM_00108 "Mus musc RefSeq  | 10.01626 | 11.77437 | -3.38255 | 800 |
| TC0200000 Nrarp     | NM_02598 "Mus musc RefSeq  | 6.241782 | 7.998193 | -3.37857 | 801 |
| TC0800001 181001101 | NM_02693 "Mus musc RefSeq  | 7.623299 | 9.378691 | -3.37618 | 802 |
| TC1200002 Dio2      | NM_01005 "Mus musc RefSeq  | 5.799118 | 4.044427 | 3.37454  | 803 |
| TC1400000 Oxnad1    | NM_14546 "Mus musc RefSeq  | 7.286997 | 5.532911 | 3.373126 | 804 |
| TC1500001 Lynx1     | NM_01183 "Mus musc RefSeq  | 7.448249 | 5.695198 | 3.370706 | 805 |
| TC1100003 Tmem88    | NM_02591 "Mus musc RefSeq  | 8.680634 | 10.4321  | -3.36701 | 806 |
| TC0700000 Vimp      | NM_02443 "Mus musc RefSeq  | 7.335127 | 5.585721 | 3.362201 | 807 |
| TC1100001 Scarf1    | NM_00100 "Mus musc RefSeq  | 6.497578 | 8.245196 | -3.35804 | 808 |
| TC1400000 Gdf10     | NM_14574 "Mus musc RefSeq  | 6.683163 | 4.937479 | 3.353538 | 809 |
| TC0200005 Pmepa1    | NM_02299 "Mus musc RefSeq  | 8.633917 | 6.890003 | 3.349426 | 810 |
| TC0100001 Pik3c2b   | NM_00109 "Mus musc RefSeq  | 6.901703 | 8.645229 | -3.34853 | 811 |
| TC0100002 Ptp4a1    | NM_01120 "Mus musc RefSeq  | 9.985772 | 8.243016 | 3.346739 | 812 |
| TC0900002 Nxpe2     | NM_03006 "Mus musc RefSeq  | 3.670185 | 5.412404 | -3.34549 | 813 |
| TC1000000 Eid3      | NM_02549 "Mus musc RefSeq  | 7.497946 | 5.756002 | 3.344856 | 814 |
| TC0600002 Pdzn3     | NM_01888 "Mus musc RefSeq  | 7.033822 | 5.292046 | 3.344466 | 815 |
| TC0800000 Mcf2l     | NM_17807 "Mus musc RefSeq  | 6.700693 | 8.442344 | -3.34418 | 816 |
| TC0300002 Adamtsl4  | NM_14489 "Mus musc RefSeq  | 8.300576 | 6.559298 | 3.343312 | 817 |
| TC1600002 Vasn      | NM_13930 "Mus musc RefSeq  | 7.396008 | 5.655572 | 3.341361 | 818 |
| TC0500002 Rasgef1b  | NM_14583 "Mus musc RefSeq  | 6.672764 | 4.935249 | 3.334603 | 819 |
| TC1700001 H2-T24    | NM_00820 "Mus musc RefSeq  | 6.138621 | 7.872969 | -3.32729 | 820 |
| TC1900001 Sorbs1    | NM_00103 "Mus musc RefSeq  | 6.563206 | 8.297037 | -3.3261  | 821 |
| TC0200005 Lama5     | NM_00108 "Mus musc RefSeq  | 6.225152 | 7.958604 | -3.32523 | 822 |
| TC0X00000 Usp11     | NM_14562 "Mus musc RefSeq  | 6.367905 | 4.635191 | 3.323525 | 823 |
| TC1100000 Sh3pxd2b  | NM_17736 "Mus musc RefSeq  | 6.970556 | 5.237903 | 3.323384 | 824 |
| TC1100001 Gngt2     | NM_02312 "Mus musc RefSeq  | 5.508459 | 7.240718 | -3.32248 | 825 |
| TC1000002 Nts       | NM_02443 "Mus musc RefSeq  | 4.31959  | 6.051842 | -3.32246 | 826 |
| TC1100000 Stk10     | NM_00928 "Mus musc RefSeq  | 7.306523 | 9.037001 | -3.31838 | 827 |
| TC0900000 Eepd1     | NM_02618 "Mus musc RefSeq  | 6.586163 | 8.313174 | -3.31041 | 828 |
| TC0300002 Il6ra     | NM_01055 "Mus musc RefSeq  | 7.436773 | 5.712475 | 3.304193 | 829 |
| TC1000002 Susd2     | NM_02789 "Mus musc RefSeq  | 6.788504 | 5.064728 | 3.302998 | 830 |
| TC0100002 Myo1b     | NM_00116 "Mus musc RefSeq  | 6.74653  | 8.470303 | -3.30299 | 831 |
| TC1700001 Tnfrsf12a | NM_01374 "Mus musc RefSeq  | 8.573317 | 6.850997 | 3.299666 | 832 |
| TC1200001 Cys1      | NM_13868 "Mus musc RefSeq  | 6.251379 | 4.529691 | 3.298221 | 833 |
| TC0400000 Gm10590   | ENSMUST0 cdna:know ENSEMBL | 5.2212   | 3.501727 | 3.293161 | 834 |
| TC0900001 Fli1      | NM_00802 "Mus musc RefSeq  | 8.447342 | 10.1645  | -3.28788 | 835 |
| TC0700004 Sez6l2    | NM_00125 "Mus musc RefSeq  | 5.73711  | 7.452633 | -3.28416 | 836 |
| TC1200001 Prkd1     | NM_00885 "Mus musc RefSeq  | 5.822965 | 7.537014 | -3.2808  | 837 |
| TC0100001 Itpkb     | NM_00108 "Mus musc RefSeq  | 8.827881 | 10.53373 | -3.2622  | 838 |
| TC1600001 Cbr3      | NM_17304 "Mus musc RefSeq  | 5.786885 | 4.081583 | 3.260972 | 839 |
| TC0100003 Hsd11b1   | NM_00104 "Mus musc RefSeq  | 6.017675 | 4.312706 | 3.260219 | 840 |
| TC0500001 Chek2     | NM_01668 "Mus musc RefSeq  | 5.195576 | 6.90049  | -3.2601  | 841 |
| TC1800001 Pcdh1     | NM_02935 "Mus musc RefSeq  | 6.848008 | 8.551322 | -3.25648 | 842 |
| TC1200000 Ttc8      | NM_02955 "Mus musc RefSeq  | 6.148512 | 4.445494 | 3.255813 | 843 |
| TC1400000 Thrbs     | NM_00111 "Mus musc RefSeq  | 5.960391 | 4.2582   | 3.253948 | 844 |
| TC0700002 Peg3      | NM_00881 "Mus musc RefSeq  | 7.448122 | 5.747261 | 3.250949 | 845 |

|                     |                            |          |          |          |     |
|---------------------|----------------------------|----------|----------|----------|-----|
| TC1100000 Ubt2      | NM_17378 "Mus musc RefSeq  | 8.153088 | 6.455248 | 3.244149 | 846 |
| TC1800001 LOC100862 | XM_00368 "PREDICTEI RefSeq | 8.589851 | 6.89852  | 3.229545 | 847 |
| TC0800002 B3gnt9    | NM_17887 "Mus musc RefSeq  | 6.480306 | 4.789002 | 3.229485 | 848 |
| TC1100003 Arhgap27  | NM_13371 "Mus musc RefSeq  | 5.945339 | 7.635298 | -3.22648 | 849 |
| TC1800001 Epb4.1l4a | NM_01351 "Mus musc RefSeq  | 5.390823 | 7.080604 | -3.22608 | 850 |
| TC1000002 Dram1     | NM_02787 "Mus musc RefSeq  | 7.506444 | 5.818141 | 3.222774 | 851 |
| TC0400001 Pik3r3    | NM_18158 "Mus musc RefSeq  | 6.468929 | 8.154576 | -3.21685 | 852 |
| TC0100002 Gli2      | NM_00108 "Mus musc RefSeq  | 6.863363 | 5.180046 | 3.211655 | 853 |
| TC1100001 Rab34     | NM_00115 "Mus musc RefSeq  | 6.70211  | 5.019956 | 3.209067 | 854 |
| TC0900003 Parp3     | NM_14561 "Mus musc RefSeq  | 7.243278 | 5.561714 | 3.207755 | 855 |
| TC1400002 Dock9     | NM_00108 "Mus musc RefSeq  | 8.719766 | 10.40125 | -3.20758 | 856 |
| TC0900000 Arhgap32  | NM_00119 "Mus musc RefSeq  | 7.107834 | 5.426532 | 3.207173 | 857 |
| TC0500000 Sod3      | NM_01143 "Mus musc RefSeq  | 6.534042 | 4.852806 | 3.207026 | 858 |
| TC0300001 Syde2     | NM_00116 "Mus musc RefSeq  | 6.148081 | 4.467345 | 3.205915 | 859 |
| TC1300000 Slc12a7   | NM_01139 "Mus musc RefSeq  | 5.994318 | 7.669766 | -3.19419 | 860 |
| TC1700000 Notch4    | NM_01092 "Mus musc RefSeq  | 7.099857 | 8.77341  | -3.18999 | 861 |
| TC0900000 Ets1      | NM_00103 "Mus musc RefSeq  | 7.92161  | 9.593784 | -3.18695 | 862 |
| TC1600000 Ppm1f     | NM_17683 "Mus musc RefSeq  | 6.950652 | 8.622783 | -3.18685 | 863 |
| TC0300000 Tiparp    | NM_17889 "Mus musc RefSeq  | 7.789461 | 6.117999 | 3.185372 | 864 |
| TC0300000 P2ry1     | NM_00877 "Mus musc RefSeq  | 5.700807 | 4.029998 | 3.183931 | 865 |
| TC0200002 Camk1d    | NM_17734 "Mus musc RefSeq  | 5.785823 | 4.116735 | 3.180135 | 866 |
| TC0300001 Hey1      | NM_01042 "Mus musc RefSeq  | 8.362531 | 10.03145 | -3.17976 | 867 |
| TC1400000 Sox7      | NM_01144 "Mus musc RefSeq  | 7.354761 | 9.023379 | -3.1791  | 868 |
| TC0800001 Cdh5      | NM_00986 "Mus musc RefSeq  | 10.32769 | 11.99578 | -3.17794 | 869 |
| TC1700001 Slc9a3r2  | NM_02344 "Mus musc RefSeq  | 9.220765 | 10.88848 | -3.17711 | 870 |
| TC0300000 She       | NM_17253 "Mus musc RefSeq  | 6.924658 | 8.592298 | -3.17695 | 871 |
| TC0500003 Oas1a     | NM_14521 "Mus musc RefSeq  | 5.74067  | 7.402138 | -3.16338 | 872 |
| TC1900000 Vldlr     | NM_00116 "Mus musc RefSeq  | 6.403839 | 4.744495 | 3.158729 | 873 |
| TC1500000 Apobec3   | NM_00116 "Mus musc RefSeq  | 5.680038 | 7.338811 | -3.15748 | 874 |
| TC1900000 Efemp2    | NM_02147 "Mus musc RefSeq  | 8.044758 | 6.387903 | 3.153284 | 875 |
| TC1000002 Elk3      | NM_00128 "ELK3, mer RefSeq | 8.314332 | 9.971111 | -3.15312 | 876 |
| TC0200001 MERTK     | NM_00858 "Mus musc RefSeq  | 6.377225 | 8.03397  | -3.15304 | 877 |
| TC0900002 Col12a1   | NM_00773 "Mus musc RefSeq  | 5.759923 | 4.103233 | 3.152923 | 878 |
| TC1100003 Slc16a13  | NM_17237 "Mus musc RefSeq  | 6.020665 | 7.676581 | -3.15123 | 879 |
| TC0700002 Plekhf1   | NM_02441 "Mus musc RefSeq  | 7.985672 | 6.329814 | 3.151105 | 880 |
| TC0900000 Kdelc2    | NM_21244 "Mus musc RefSeq  | 7.694461 | 6.039806 | 3.148479 | 881 |
| TC0200000 Bend7     | NM_00119 "Mus musc RefSeq  | 5.103446 | 6.757948 | -3.14815 | 882 |
| TC1000002 Trhde     | NM_14624 "Mus musc RefSeq  | 4.95592  | 3.3015   | 3.147966 | 883 |
| TC1700001 Epas1     | NM_01013 "Mus musc RefSeq  | 9.723208 | 11.37728 | -3.14722 | 884 |
| TC1300001 Gfod1     | NM_00103 "Mus musc RefSeq  | 5.094979 | 6.748024 | -3.14497 | 885 |
| TC0500002 Apbb2     | NM_00120 "Mus musc RefSeq  | 7.609606 | 9.262085 | -3.14373 | 886 |
| TC1800000 Gata6     | NM_01025 "Mus musc RefSeq  | 8.799044 | 7.147123 | 3.142518 | 887 |
| TC0500000 Ppbp      | NM_02378 "Mus musc RefSeq  | 5.213469 | 6.864705 | -3.14103 | 888 |
| TC0100002 Dsel      | NM_00108 "Mus musc RefSeq  | 7.97892  | 6.328453 | 3.139352 | 889 |
| TC0200000 Ptgs1     | NM_00896 "Mus musc RefSeq  | 5.223124 | 6.872528 | -3.13704 | 890 |
| TC0200004 Kcnp3     | NM_00111 "Mus musc RefSeq  | 7.118133 | 5.470966 | 3.13218  | 891 |
| TC0600000 Arhgef5   | NM_13367 "Mus musc RefSeq  | 5.551171 | 7.197644 | -3.13067 | 892 |

|                     |                                |          |          |          |     |
|---------------------|--------------------------------|----------|----------|----------|-----|
| TC1400000 Ptprg     | NM_00898 "Mus musc RefSeq      | 8.013914 | 9.659748 | -3.12929 | 893 |
| TC0300001 Bdh2      | ENSMUST0 cdna:know ENSEMBL     | 5.755503 | 4.11183  | 3.124603 | 894 |
| TC0400004 Mup12     | NM_00119 "Mus musc RefSeq      | 5.498737 | 3.856426 | 3.121655 | 895 |
| TC0600001 Vwf       | NM_01170 "Mus musc RefSeq      | 5.300607 | 6.942121 | -3.11993 | 896 |
| TC1900001 Mamdc2    | NM_17485 "Mus musc RefSeq      | 6.532204 | 4.890732 | 3.11984  | 897 |
| TC0X00001 Rgag1     | NM_00104 "Mus musc RefSeq      | 4.923137 | 3.283962 | 3.114877 | 898 |
| TC1600001 Arhgap31  | NM_02026 "Mus musc RefSeq      | 8.081422 | 9.71881  | -3.11102 | 899 |
| TC0700004 Tnfrsf22  | NM_02368 "Mus musc RefSeq      | 6.210883 | 7.847877 | -3.11017 | 900 |
| TC0X00001 Klhl13    | NM_02616 "Mus musc RefSeq      | 6.028212 | 4.392531 | 3.107342 | 901 |
| TC0700000 Prkd2     | NM_00125 "Mus musc RefSeq      | 8.041866 | 9.677518 | -3.10728 | 902 |
| TC1200001 Inf2      | NM_19841 "Mus musc RefSeq      | 6.186447 | 7.821819 | -3.10668 | 903 |
| TC1600000 Fetub     | NM_00108 "Mus musc RefSeq      | 5.607222 | 3.972197 | 3.105929 | 904 |
| TC1400001 Gm3248    | ENSMUST0 cdna:putat ENSEMBL    | 5.350426 | 6.984744 | -3.10441 | 905 |
| TC0500002 Evc       | NM_02129 "Mus musc RefSeq      | 6.708596 | 5.075077 | 3.102689 | 906 |
| TC0900003 Sema3f    | NM_01134 "Mus musc RefSeq      | 6.513952 | 8.147071 | -3.10183 | 907 |
| TC1500001 Nr4a1     | NM_01044 "Mus musc RefSeq      | 11.27286 | 9.640124 | 3.100995 | 908 |
| TC0600001 Cxcl12    | NM_02170 "Mus musc RefSeq      | 7.895506 | 9.527551 | -3.09952 | 909 |
| TC1200002 Ston2     | NM_17536 "Mus musc RefSeq      | 6.443878 | 4.814449 | 3.093905 | 910 |
| TC0X00001 Magix     | NM_01883 "Mus musc RefSeq      | 5.318495 | 6.946167 | -3.09014 | 911 |
| TC0600002 Skap2     | NM_01877 "Mus musc RefSeq      | 6.26362  | 7.887449 | -3.08192 | 912 |
| TC1600000 B4galt4   | NM_01980 "Mus musc RefSeq      | 6.304342 | 7.926302 | -3.07793 | 913 |
| TC1900000 Trpm3     | NM_00103 "Mus musc RefSeq      | 4.81215  | 6.432326 | -3.07413 | 914 |
| TC0300002 Syt11     | NM_01880 "Mus musc RefSeq      | 6.501293 | 4.881396 | 3.073531 | 915 |
| TC1700000 Rps6ka2   | NM_01129 "Mus musc RefSeq      | 6.523573 | 8.143048 | -3.07263 | 916 |
| TC0X00002 Apln      | NM_01391 "Mus musc RefSeq      | 3.780895 | 5.399175 | -3.07009 | 917 |
| TC1700002 Ptprm     | NM_00898 "Mus musc RefSeq      | 8.107856 | 9.725812 | -3.0694  | 918 |
| TC0500000 Yes1      | NM_00120 "Mus musc RefSeq      | 6.478997 | 8.096612 | -3.06867 | 919 |
| TC1100004 Caskin2   | NM_08064 "Mus musc RefSeq      | 6.938124 | 8.555474 | -3.06811 | 920 |
| TC0500002 Sh3tc1    | NM_19434 "Mus musc RefSeq      | 5.914776 | 7.531604 | -3.067   | 921 |
| TC1300002 Naip6     | NM_01087 "Mus musc RefSeq      | 4.080441 | 5.695704 | -3.06367 | 922 |
| TC1500002 Rapgef3   | NM_14485 "Mus musc RefSeq      | 6.769937 | 8.384433 | -3.06205 | 923 |
| TC1100001 Slfn2     | NM_01140 "Mus musc RefSeq      | 4.964502 | 6.578086 | -3.06011 | 924 |
| TC0400003 Epb4.1    | NM_00112 "Mus musc RefSeq      | 6.231545 | 7.84481  | -3.05943 | 925 |
| TC1000001 Ikkip     | NM_02616 "Mus musc RefSeq      | 7.041546 | 5.434656 | 3.045945 | 926 |
| TC0600001 Plekha5   | NM_14492 "Mus musc RefSeq      | 7.857065 | 6.252832 | 3.040341 | 927 |
| TC0800000 Pdlim3    | NM_01679 "Mus musc RefSeq      | 8.281922 | 6.677869 | 3.039961 | 928 |
| TC0900000 Gucy1a2   | NM_00103 "Mus musc RefSeq      | 5.682624 | 4.078641 | 3.039814 | 929 |
| TC1400001 LOC100504 | XM_00308 "PREDICTED MGI/Jacksc | 3.426813 | 5.029967 | -3.03807 | 930 |
| TC0100003 Ifi203    | NM_00832 "Mus musc RefSeq      | 7.655429 | 9.258284 | -3.03744 | 931 |
| TC0400000 Chd7      | NM_00127 "Mus musc RefSeq      | 5.489805 | 7.092553 | -3.03721 | 932 |
| TC0600001 Gm17482   | ENSMUST0 cdna:know ENSEMBL     | 1.584963 | 3.187302 | -3.03635 | 933 |
| TC0800002 Tppp3     | NM_02648 "Mus musc RefSeq      | 8.772597 | 7.170305 | 3.036253 | 934 |
| TC0600001 Lmcd1     | NM_14479 "Mus musc RefSeq      | 6.968441 | 8.570719 | -3.03622 | 935 |
| TC0600003 Dernd5b   | NM_17719 "Mus musc RefSeq      | 5.786188 | 7.385641 | -3.03028 | 936 |
| TC0600002 Ssu2      | NM_17552 "Mus musc RefSeq      | 5.711313 | 7.30952  | -3.02767 | 937 |
| TC1400002 Abcc4     | NM_00116 "Mus musc RefSeq      | 6.581976 | 8.180095 | -3.02748 | 938 |
| TC0400001 Mfap2     | NM_00116 "Mus musc RefSeq      | 7.801673 | 6.20366  | 3.027261 | 939 |

|                    |                              |          |          |          |     |
|--------------------|------------------------------|----------|----------|----------|-----|
| TC0200005 Kcnb1    | NM_00842 "Mus musc RefSeq    | 5.812785 | 7.408759 | -3.02299 | 940 |
| TC1500001 Apol10b  | NM_17782 "Mus musc RefSeq    | 5.251379 | 6.843884 | -3.01573 | 941 |
| TC0200003 Notch1   | NM_00871 "Mus musc RefSeq    | 7.68304  | 9.274554 | -3.01365 | 942 |
| TC0400001 EphA2    | NM_01013 "Mus musc RefSeq    | 6.421393 | 8.01174  | -3.01122 | 943 |
| TC1000001 Fgd6     | NM_05307 "Mus musc RefSeq    | 4.51462  | 6.104834 | -3.01094 | 944 |
| TC1700000 Pde9a    | NM_00116 "Mus musc RefSeq    | 7.659816 | 6.069822 | 3.010481 | 945 |
| TC1800000 Adamts19 | NM_17550 "Mus musc RefSeq    | 5.433691 | 3.846115 | 3.00544  | 946 |
| TC1400001 Lpar6    | NM_17511 "Mus musc RefSeq    | 2.957351 | 4.543946 | -3.0034  | 947 |
| TC0400003 Alpl     | NM_00128 "alkaline pl RefSeq | 7.038041 | 8.623761 | -3.00158 | 948 |
| TC0600000 Aqp1     | NM_00747 "Mus musc RefSeq    | 10.15931 | 11.74452 | -3.00052 | 949 |
| TC1700002 H2-Q7    | NM_01039 "Mus musc RefSeq    | 7.043316 | 8.628106 | -2.99964 | 950 |
| TC1400002 Lrch1    | NM_00125 "Mus musc RefSeq    | 6.283351 | 7.867213 | -2.99771 | 951 |
| TC1700002 Map4k3   | NM_00108 "Mus musc RefSeq    | 7.851901 | 9.434829 | -2.99577 | 952 |
| TC0500001 Cd36     | NM_00115 "Mus musc RefSeq    | 9.984305 | 11.56691 | -2.99509 | 953 |
| TC1100002 Gm5431   | NM_00102 "Mus musc RefSeq    | 4.589523 | 6.16809  | -2.98673 | 954 |
| TC0100003 Lamc1    | NM_01068 "Mus musc RefSeq    | 11.06996 | 9.491559 | 2.986395 | 955 |
| TC0100002 Mgat4a   | NM_17387 "Mus musc RefSeq    | 6.134057 | 7.711124 | -2.98363 | 956 |
| TC0400002 Ptpn3    | NM_01120 "Mus musc RefSeq    | 5.796106 | 4.219515 | 2.982642 | 957 |
| TC1000002 Cep85l   | NM_00120 "Mus musc RefSeq    | 7.077921 | 8.654286 | -2.98218 | 958 |
| TC0100003 Tgfb2    | NM_00936 "Mus musc RefSeq    | 8.009201 | 6.433561 | 2.980677 | 959 |
| TC0100003 Rasal2   | NM_17764 "Mus musc RefSeq    | 6.910498 | 8.485112 | -2.97856 | 960 |
| TC0900001 Slc9a9   | NM_17790 "Mus musc RefSeq    | 5.738078 | 4.164317 | 2.976797 | 961 |
| TC1900000 Stambpl1 | NM_02968 "Mus musc RefSeq    | 6.308629 | 4.736523 | 2.973384 | 962 |
| TC0200003 Lrrc55   | NM_00103 "Mus musc RefSeq    | 5.640321 | 4.069627 | 2.970476 | 963 |
| TC0600002 Rassf4   | NM_17804 "Mus musc RefSeq    | 5.042342 | 6.611538 | -2.96739 | 964 |
| TC0400002 Penk     | NM_00100 "Mus musc RefSeq    | 6.653667 | 5.084844 | 2.966626 | 965 |
| TC0700001 Htra1    | NM_01956 "Mus musc RefSeq    | 7.914161 | 6.345401 | 2.966496 | 966 |
| TC0600001 Irak2    | NM_00111 "Mus musc RefSeq    | 6.266698 | 7.834794 | -2.96513 | 967 |
| TC0900002 Ephb1    | NM_17344 "Mus musc RefSeq    | 4.905064 | 6.473153 | -2.96512 | 968 |
| TC1800001 Slc39a6  | NM_13914 "Mus musc RefSeq    | 7.861807 | 6.29418  | 2.964168 | 969 |
| TC0300002 Ptgfrn   | NM_01119 "Mus musc RefSeq    | 9.322551 | 7.756816 | 2.960283 | 970 |
| TC0700004 Syt17    | NM_13864 "Mus musc RefSeq    | 6.26154  | 4.698905 | 2.953929 | 971 |
| TC0400004 H6pd     | NM_17337 "Mus musc RefSeq    | 7.69841  | 6.135895 | 2.953683 | 972 |
| TC1100003 Plxdc1   | NM_02819 "Mus musc RefSeq    | 7.507093 | 5.944895 | 2.953034 | 973 |
| TC0500002 Tec      | NM_00111 "Mus musc RefSeq    | 4.178143 | 5.740018 | -2.95237 | 974 |
| TC0100000 Casp8    | NM_00981 "Mus musc RefSeq    | 7.605916 | 9.167214 | -2.95119 | 975 |
| TC1400000 Arhgef40 | NM_19824 "Mus musc RefSeq    | 7.745076 | 6.18434  | 2.950043 | 976 |
| TC0400001 Errfi1   | NM_13375 "Mus musc RefSeq    | 9.198475 | 7.637915 | 2.949683 | 977 |
| TC0700001 Ampd3    | NM_00127 "Mus musc RefSeq    | 6.091175 | 7.65165  | -2.94951 | 978 |
| TC1700001 Rhoq     | NM_14549 "Mus musc RefSeq    | 8.414844 | 6.854675 | 2.948884 | 979 |
| TC0600002 Magi1    | NM_00108 "Mus musc RefSeq    | 6.498566 | 8.05838  | -2.94816 | 980 |
| TC1400001 36324510 | NM_02614 "Mus musc RefSeq    | 4.781704 | 3.225022 | 2.941765 | 981 |
| TC0600000 Cav1     | NM_00761 "Mus musc RefSeq    | 9.212177 | 10.76863 | -2.9413  | 982 |
| TC0500003 Oas1g    | NM_01185 "Mus musc RefSeq    | 4.934984 | 6.489488 | -2.93733 | 983 |
| TC0600001 Gata2    | NM_00809 "Mus musc RefSeq    | 7.163285 | 8.717185 | -2.9361  | 984 |
| TC0X00001 Arhgap6  | NM_00970 "Mus musc RefSeq    | 5.872461 | 4.321313 | 2.930502 | 985 |
| TC0300000 Pld1     | NM_00116 "Mus musc RefSeq    | 7.492673 | 5.942098 | 2.929339 | 986 |

|                     |                             |          |          |          |      |
|---------------------|-----------------------------|----------|----------|----------|------|
| TC1400001 Sncg      | NM_01143 "Mus musc RefSeq   | 5.816465 | 7.366869 | -2.92899 | 987  |
| TC0800001 Ces2e     | NM_17275 "Mus musc RefSeq   | 4.355208 | 5.905065 | -2.92788 | 988  |
| TC0300000 Fat4      | NM_18322 "Mus musc RefSeq   | 7.54505  | 9.09476  | -2.92758 | 989  |
| TC0500002 Lgi2      | NM_14494 "Mus musc RefSeq   | 5.20602  | 3.656459 | 2.927281 | 990  |
| TC0800000 Rnf150    | NM_17737 "Mus musc RefSeq   | 6.104361 | 4.55579  | 2.925272 | 991  |
| TC1500000 Tbc1d22a  | NM_14547 "Mus musc RefSeq   | 6.705297 | 8.252392 | -2.92228 | 992  |
| TC0400000 Tlr4      | NM_02129 "Mus musc RefSeq   | 7.967988 | 6.422933 | 2.918152 | 993  |
| TC0900001 Als2cl    | NM_00114 "Mus musc RefSeq   | 6.188763 | 7.731564 | -2.9136  | 994  |
| TC0400002 Gm10595   | ENSMUST0 cdna:know ENSEMBL  | 5.314084 | 3.771384 | 2.913392 | 995  |
| TC0400002 Gm10595   | ENSMUST0 cdna:know ENSEMBL  | 5.314084 | 3.771384 | 2.913392 | 995  |
| TC0700000 Klk8      | NM_00894 "Mus musc RefSeq   | 5.254917 | 6.796293 | -2.91072 | 997  |
| TC0900000 Cyp1a1    | NM_00999 "Mus musc RefSeq   | 4.542322 | 6.082863 | -2.90904 | 998  |
| TC0900000 Igdcc4    | NM_02004 "Mus musc RefSeq   | 6.783769 | 5.245119 | 2.905225 | 999  |
| TC1700002 H2-Q8     | NM_02312 "Mus musc RefSeq   | 8.351861 | 9.888749 | -2.90168 | 1000 |
| TC0200002 Bmp2      | NM_00755 "Mus musc RefSeq   | 6.612502 | 5.076473 | 2.899952 | 1001 |
| TC1400001 Hr        | NM_02187 "Mus musc RefSeq   | 7.118309 | 5.582542 | 2.899425 | 1002 |
| TC0500002 Tgfbr3    | NM_01157 "Mus musc RefSeq   | 9.359439 | 7.824021 | 2.898724 | 1003 |
| TC0400000 Gm10594   | ENSMUST0 cdna:know ENSEMBL  | 5.225224 | 3.691077 | 2.896171 | 1005 |
| TC0400002 Gm10594   | ENSMUST0 cdna:know ENSEMBL  | 5.225224 | 3.691077 | 2.896171 | 1005 |
| TC4_GL456 Gm10594   | ENSMUST0 cdna:know ENSEMBL  | 5.225224 | 3.691077 | 2.896171 | 1005 |
| TC4_JH584 Gm10594   | ENSMUST0 cdna:know ENSEMBL  | 5.225224 | 3.691077 | 2.896171 | 1005 |
| TC4_JH584 Gm10590   | ENSMUST0 cdna:know ENSEMBL  | 5.263843 | 3.729696 | 2.896171 | 1008 |
| TC0700002 4931406P1 | NM_17274 "Mus musc RefSeq   | 8.057367 | 9.589774 | -2.89268 | 1009 |
| TC1000002 Gipc3     | NM_14895 "Mus musc RefSeq   | 6.580234 | 8.111806 | -2.89101 | 1010 |
| TC1100004 4-Sep     | ENSMUST0 cdna:novel ENSEMBL | 7.391851 | 8.923083 | -2.89033 | 1011 |
| TC1400000 Gm8297    | XM_98607 "PREDICTEI RefSeq  | 4.522963 | 6.054146 | -2.89023 | 1012 |
| TC0500000 Arhgap24  | NM_02927 "Mus musc RefSeq   | 5.618282 | 4.087191 | 2.890043 | 1013 |
| TC1400001 Fam107a   | NM_18318 "Mus musc RefSeq   | 5.473089 | 7.00375  | -2.88918 | 1014 |
| TC0300002 Enpep     | NM_00793 "Mus musc RefSeq   | 6.527431 | 4.997041 | 2.888639 | 1015 |
| TC0200004 Itpripl1  | NM_00116 "Mus musc RefSeq   | 7.097944 | 8.627897 | -2.88776 | 1016 |
| TC1500000 Nov       | NM_01093 "Mus musc RefSeq   | 7.53196  | 6.003428 | 2.884921 | 1017 |
| TC0800003 Sipa1l2   | NM_00108 "Mus musc RefSeq   | 6.682895 | 8.211067 | -2.8842  | 1018 |
| TC1500002 Fmn13     | NM_01171 "Mus musc RefSeq   | 7.301932 | 8.828128 | -2.88025 | 1019 |
| TC0100000 Adhfe1    | NM_17523 "Mus musc RefSeq   | 6.117376 | 4.592532 | 2.877556 | 1020 |
| TC0500002 Atp8a1    | NM_00972 "Mus musc RefSeq   | 5.996903 | 7.519513 | -2.8731  | 1021 |
| TC1000002 Slc41a2   | NM_17738 "Mus musc RefSeq   | 5.930877 | 4.409778 | 2.870096 | 1022 |
| TC0400001 Camk2n1   | NM_02545 "Mus musc RefSeq   | 8.544685 | 7.023691 | 2.869887 | 1023 |
| TC0900003 Dync2h1   | NM_02985 "Mus musc RefSeq   | 5.076761 | 3.555884 | 2.869654 | 1024 |
| TC0900000 Pygo1     | NM_02811 "Mus musc RefSeq   | 6.2804   | 4.762161 | 2.864412 | 1025 |
| TC1100003 Leprel4   | NM_17683 "Mus musc RefSeq   | 7.303692 | 5.785715 | 2.863892 | 1026 |
| TC1000001 Avpr1a    | NM_01684 "Mus musc RefSeq   | 6.490402 | 4.973581 | 2.861598 | 1027 |
| TC0500002 Sgcb      | NM_01189 "Mus musc RefSeq   | 8.86336  | 7.348142 | 2.85842  | 1028 |
| TC0400000 Gm2457    | XM_00147 "PREDICTEI RefSeq  | 6.594961 | 5.083349 | 2.851285 | 1029 |
| TC0600000 Adcyap1r1 | NM_00740 "Mus musc RefSeq   | 6.974707 | 5.463736 | 2.850018 | 1030 |
| TC1800000 Megf10    | NM_00100 "Mus musc RefSeq   | 6.26651  | 4.757785 | 2.845584 | 1031 |
| TC1900001 Fam189a2  | NM_00111 "Mus musc RefSeq   | 6.996509 | 8.504527 | -2.84419 | 1032 |
| TC0200005 Ppp1r3d   | NM_00108 "Mus musc RefSeq   | 4.178982 | 5.682839 | -2.836   | 1033 |

|                     |                             |          |          |          |      |
|---------------------|-----------------------------|----------|----------|----------|------|
| TC0200001 Lrp4      | NM_00114 "Mus musc RefSeq   | 6.971915 | 5.468569 | 2.834995 | 1034 |
| TC0100000 Pnkd      | NM_02558 "Mus musc RefSeq   | 7.07475  | 8.577857 | -2.83453 | 1035 |
| TC0300000 S100a7a   | NM_19942 "Mus musc RefSeq   | 5.300861 | 3.799025 | 2.832029 | 1036 |
| TC0900001 Irak1bp1  | NM_00116 "Mus musc RefSeq   | 4.953971 | 3.452493 | 2.831326 | 1037 |
| TC0300001 Tspan2    | NM_02753 "Mus musc RefSeq   | 6.659598 | 8.159578 | -2.82839 | 1038 |
| TC1600001 Ets2      | NM_01180 "Mus musc RefSeq   | 7.780233 | 9.277054 | -2.8222  | 1039 |
| TC0400002 Gm12394   | ENSMUST0 cdna:putat ENSEMBL | 5.228189 | 3.733004 | 2.819003 | 1040 |
| TC0300001 Gbp7      | NM_00108 "Mus musc RefSeq   | 8.573057 | 10.06675 | -2.8161  | 1041 |
| TC0500001 Ephb4     | NM_01014 "Mus musc RefSeq   | 7.533905 | 9.025562 | -2.81212 | 1042 |
| TC0700004 Nmb       | NM_02652 "Mus musc RefSeq   | 6.256841 | 4.765235 | 2.812018 | 1043 |
| TC1900000 Syt7      | NM_01880 "Mus musc RefSeq   | 5.927174 | 7.418041 | -2.81058 | 1044 |
| TC0300001 Slc16a4   | NM_14613 "Mus musc RefSeq   | 3.577744 | 5.067716 | -2.80884 | 1045 |
| TC0900000 Casp12    | NM_00980 "Mus musc RefSeq   | 7.376622 | 5.887087 | 2.807985 | 1046 |
| TC1300002 Dbn1      | NM_00117 "Mus musc RefSeq   | 7.96376  | 6.474666 | 2.807126 | 1047 |
| TC1300000 Rnf144b   | NM_14604 "Mus musc RefSeq   | 5.971629 | 7.46033  | -2.80636 | 1048 |
| TC0100003 Mndal     | NM_00117 "Mus musc RefSeq   | 7.596655 | 9.085163 | -2.80599 | 1049 |
| TC4_JH584 CR974586  | ENSMUST0 cdna:novel ENSEMBL | 6.498175 | 5.011811 | 2.801819 | 1050 |
| TC0800000 Jak3      | NM_00119 "Mus musc RefSeq   | 6.824092 | 8.310409 | -2.80173 | 1051 |
| TC0900001 Snrk      | NM_00116 "Mus musc RefSeq   | 8.259458 | 9.745562 | -2.80132 | 1052 |
| TC0X00000 Efnb1     | NM_01011 "Mus musc RefSeq   | 7.103213 | 8.588596 | -2.79992 | 1053 |
| TC1500002 Mapk11    | NM_01116 "Mus musc RefSeq   | 6.633327 | 8.116742 | -2.7961  | 1054 |
| TC1000001 Eya4      | NM_01016 "Mus musc RefSeq   | 5.023407 | 3.540439 | 2.795232 | 1055 |
| TC0500000 Fam114a1  | NM_02666 "Mus musc RefSeq   | 8.432259 | 6.949823 | 2.794201 | 1056 |
| TC1100003 Aspa      | NM_02311 "Mus musc RefSeq   | 5.433582 | 3.952756 | 2.791085 | 1057 |
| TC1300001 Ssbp2     | NM_02427 "Mus musc RefSeq   | 6.132786 | 4.65406  | 2.787025 | 1058 |
| TC0100000 Dgkd      | NM_17764 "Mus musc RefSeq   | 6.586579 | 8.064468 | -2.78541 | 1059 |
| TC0100000 Nop58     | NM_01886 "Mus musc RefSeq   | 9.104267 | 7.627579 | 2.783091 | 1060 |
| TC0200004 Hdc       | NM_00823 "Mus musc RefSeq   | 4.478417 | 5.954073 | -2.7811  | 1061 |
| TC0800001 Adam9     | NM_00127 "Mus musc RefSeq   | 9.344659 | 7.869961 | 2.779255 | 1062 |
| TC1300001 Net1      | NM_00104 "Mus musc RefSeq   | 5.645814 | 7.119749 | -2.77779 | 1063 |
| TC0700001 Rgma      | NM_17774 "Mus musc RefSeq   | 7.627242 | 6.154235 | 2.775999 | 1064 |
| TC1800000 9430020KC | NM_00108 "Mus musc RefSeq   | 8.713583 | 10.18437 | -2.77173 | 1065 |
| TC1300002 Naip5     | NM_01087 "Mus musc RefSeq   | 3.647199 | 5.117304 | -2.77042 | 1066 |
| TC0200000 Rapgef1   | NM_00103 "Mus musc RefSeq   | 8.426034 | 9.893472 | -2.7653  | 1067 |
| TC1300001 Esm1      | NM_02361 "Mus musc RefSeq   | 4.447372 | 5.912773 | -2.7614  | 1068 |
| TC1300000 Mef2c     | NM_02528 "Mus musc RefSeq   | 6.856642 | 8.321401 | -2.76017 | 1069 |
| TC1400000 Anxa8     | NM_01347 "Mus musc RefSeq   | 6.158261 | 4.694408 | 2.758441 | 1070 |
| TC1400002 Dzip1     | NM_02594 "Mus musc RefSeq   | 5.690126 | 4.227005 | 2.757042 | 1071 |
| TC0500000 Tcf23     | NM_05308 "Mus musc RefSeq   | 4.610303 | 6.072983 | -2.7562  | 1072 |
| TC1400002 Ugg2      | NM_00108 "Mus musc RefSeq   | 5.193124 | 3.730687 | 2.755735 | 1073 |
| TC1400001 Lrrc3b    | NM_14605 "Mus musc RefSeq   | 4.697461 | 6.159046 | -2.75411 | 1074 |
| TC1900000 Map3k11   | NM_02201 "Mus musc RefSeq   | 6.926397 | 8.387231 | -2.75267 | 1075 |
| TC1600001 Tmem44    | NM_17261 "Mus musc RefSeq   | 5.438745 | 6.897276 | -2.74828 | 1076 |
| TC0800002 Rhod1     | NM_17769 "Mus musc RefSeq   | 5.828052 | 7.286454 | -2.74804 | 1077 |
| TC1500000 Atxn10    | NM_01684 "Mus musc RefSeq   | 8.772753 | 7.314744 | 2.74729  | 1078 |
| TC0X00003 Gm614     | NM_00103 "Mus musc RefSeq   | 3.691252 | 5.147623 | -2.74417 | 1079 |
| TC1000001 Cdk17     | NM_14623 "Mus musc RefSeq   | 6.732894 | 8.189202 | -2.74405 | 1080 |

|                    |                              |          |          |          |      |
|--------------------|------------------------------|----------|----------|----------|------|
| TC0200001 Duox1    | NM_00109 "Mus musc RefSeq    | 5.991851 | 4.535947 | 2.743284 | 1081 |
| TC1900000 Slc1a1   | NM_00919 "Mus musc RefSeq    | 4.811889 | 6.267454 | -2.74264 | 1082 |
| TC0800002 Nfix     | NM_00108 "Mus musc RefSeq    | 9.168775 | 7.714357 | 2.74046  | 1083 |
| TC0700002 Atf5     | NM_03069 "Mus musc RefSeq    | 7.104843 | 5.650884 | 2.739588 | 1084 |
| TC1600000 Jam2     | NM_02384 "Mus musc RefSeq    | 9.063138 | 10.51666 | -2.73876 | 1085 |
| TC0300001 Fndc3b   | NM_17318 "Mus musc RefSeq    | 9.602121 | 8.148906 | 2.738176 | 1086 |
| TC1000001 Ulbp1    | NM_02997 "Mus musc RefSeq    | 4.278489 | 5.73145  | -2.73769 | 1087 |
| TC1700002 Sema6b   | NM_01366 "Mus musc RefSeq    | 6.918495 | 8.370701 | -2.73626 | 1088 |
| TC1800000 Gramd3   | NM_02624 "Mus musc RefSeq    | 6.097492 | 4.645729 | 2.735421 | 1089 |
| TC0200000 Tanc1    | NM_19829 "Mus musc RefSeq    | 6.959259 | 8.4108   | -2.735   | 1090 |
| TC0300002 Plekho1  | NM_02332 "Mus musc RefSeq    | 7.297125 | 8.748565 | -2.73481 | 1091 |
| TC0500000 Cc2d2a   | NM_17227 "Mus musc RefSeq    | 7.155373 | 5.703995 | 2.734691 | 1092 |
| TC0X00000 Stard8   | NM_19901 "Mus musc RefSeq    | 6.02741  | 7.477302 | -2.73188 | 1093 |
| TC0200005 Rbl1     | NM_01124 "Mus musc RefSeq    | 4.900485 | 6.34946  | -2.73014 | 1094 |
| TC0200005 Zbtb46   | NM_02765 "Mus musc RefSeq    | 5.349099 | 6.79695  | -2.72801 | 1095 |
| TC1000000 Plekhg1  | NM_00115 "Mus musc RefSeq    | 7.647899 | 9.095233 | -2.72704 | 1096 |
| TC0X00002 Cysltr1  | NM_02147 "Mus musc RefSeq    | 3.237849 | 4.684961 | -2.72662 | 1097 |
| TC1800000 Snx24    | NM_02939 "Mus musc RefSeq    | 6.313244 | 4.86795  | 2.723183 | 1098 |
| TC1100001 Chad     | NM_00768 "Mus musc RefSeq    | 5.66051  | 4.215249 | 2.723121 | 1099 |
| TC1000000 Txlnb    | NM_13862 "Mus musc RefSeq    | 5.527206 | 6.9719   | -2.72205 | 1100 |
| TC1300002 Thbs4    | NM_01158 "Mus musc RefSeq    | 6.689711 | 5.246705 | 2.718868 | 1101 |
| TC0500001 P2rx4    | NM_01102 "Mus musc RefSeq    | 7.58278  | 6.140289 | 2.717897 | 1102 |
| TC0500003 Pitpnm2  | NM_00128 "phosphati RefSeq   | 6.827787 | 8.269032 | -2.71555 | 1103 |
| TC1200001 Vipr2    | NM_00951 "Mus musc RefSeq    | 6.461664 | 5.021299 | 2.713895 | 1104 |
| TC1200001 Trib2    | NM_14455 "Mus musc RefSeq    | 6.818474 | 8.258452 | -2.71317 | 1105 |
| TC1200000 Gm527    | NM_00102 "Mus musc RefSeq    | 6.88284  | 5.443248 | 2.712441 | 1106 |
| TC0500001 Lrrc8c   | NM_13389 "Mus musc RefSeq    | 8.834443 | 10.27259 | -2.70973 | 1107 |
| TC0700001 Gdpd5    | NM_20135 "Mus musc RefSeq    | 6.202955 | 7.640567 | -2.70872 | 1108 |
| TC0100002 Rftn2    | NM_02871 "Mus musc RefSeq    | 6.566813 | 5.129978 | 2.707263 | 1109 |
| TC0100003 G0s2     | NM_00805 "Mus musc RefSeq    | 7.487243 | 6.05077  | 2.706584 | 1110 |
| TC1300002 Map3k1   | NM_01194 "Mus musc RefSeq    | 7.015379 | 8.451736 | -2.70637 | 1111 |
| TC0200001 Fgf7     | NM_00800 "Mus musc RefSeq    | 4.664832 | 3.22963  | 2.7042   | 1112 |
| TC1300002 Naip2    | NM_01087 "Mus musc RefSeq    | 3.681323 | 5.112694 | -2.69703 | 1113 |
| TC1600001 Klhl6    | NM_18339 "Mus musc RefSeq    | 5.715216 | 7.146586 | -2.69703 | 1114 |
| TC1400000 Gm3029   | XM_00147 "PREDICTEI RefSeq   | 4.864952 | 6.296207 | -2.69681 | 1115 |
| TC0200005 D630003M | NM_00113 "Mus musc RefSeq    | 6.759216 | 5.329302 | 2.694307 | 1116 |
| TC1400001 Tspan14  | NM_14592 "Mus musc RefSeq    | 7.106621 | 8.535101 | -2.69163 | 1117 |
| TC1100003 Myo1d    | NM_17739 "Mus musc RefSeq    | 7.679838 | 9.106134 | -2.68756 | 1118 |
| TC0300001 Adh1     | NM_00740 "Mus musc RefSeq    | 7.838734 | 9.264851 | -2.68723 | 1119 |
| TC0600000 Gpnmb    | NM_05311 "Mus musc RefSeq    | 6.011962 | 4.586559 | 2.685895 | 1120 |
| TC0100003 Dnm3     | NM_00103 "Mus musc RefSeq    | 5.860811 | 7.286146 | -2.68577 | 1121 |
| TC0800002 Dok4     | NM_05324 "Mus musc RefSeq    | 6.711567 | 8.136166 | -2.6844  | 1122 |
| TC0600001 Fbln2    | NM_00799 "Mus musc RefSeq    | 10.53871 | 9.114708 | 2.683296 | 1123 |
| TC0900001 Panx1    | NM_01948 "Mus musc RefSeq    | 6.336359 | 4.914637 | 2.679051 | 1124 |
| TC0900000 Cryab    | NM_00128 "crystallin, RefSeq | 8.481207 | 7.060393 | 2.677365 | 1125 |
| TC1700002 Slc8a1   | NM_01140 "Mus musc RefSeq    | 5.219142 | 3.798464 | 2.677113 | 1126 |
| TC0100003 Soat1    | NM_00923 "Mus musc RefSeq    | 7.317954 | 5.898466 | 2.674906 | 1127 |



|                    |                             |          |          |          |      |
|--------------------|-----------------------------|----------|----------|----------|------|
| TC0400003 Zfp69    | NM_00100 "Mus musc RefSeq   | 5.686674 | 7.10541  | -2.67351 | 1128 |
| TC1200000 Lamb1    | NM_00848 "Mus musc RefSeq   | 9.963551 | 8.546552 | 2.670295 | 1129 |
| TC0200000 Fam102a  | NM_15356 "Mus musc RefSeq   | 7.303441 | 8.72004  | -2.66955 | 1130 |
| TC0400001 Fabp3    | NM_01017 "Mus musc RefSeq   | 7.118409 | 8.528785 | -2.65806 | 1131 |
| TC0900001 Ccbp2    | NM_02160 "Mus musc RefSeq   | 7.061183 | 5.651378 | 2.657012 | 1132 |
| TC0600000 Rtkn     | NM_00113 "Mus musc RefSeq   | 6.702592 | 5.292946 | 2.65672  | 1133 |
| TC0500003 Cmk1r1   | NM_00815 "Mus musc RefSeq   | 7.862178 | 6.453461 | 2.655009 | 1134 |
| TC0500002 Prom1    | NM_00116 "Mus musc RefSeq   | 3.384234 | 4.790299 | -2.65013 | 1135 |
| TC0700001 Pde3b    | NM_01105 "Mus musc RefSeq   | 4.996758 | 3.590693 | 2.650133 | 1135 |
| TC0800001 Wfdc1    | NM_02339 "Mus musc RefSeq   | 6.731255 | 5.326764 | 2.647244 | 1137 |
| TC0500002 Fryl     | NM_02819 "Mus musc RefSeq   | 7.410501 | 8.813707 | -2.64489 | 1138 |
| TC0900001 Dock6    | NM_17703 "Mus musc RefSeq   | 7.782488 | 9.184577 | -2.64284 | 1139 |
| TC1900000 Rasgrp2  | NM_01124 "Mus musc RefSeq   | 6.406621 | 7.807513 | -2.64065 | 1140 |
| TC0900000 Usp2     | NM_19809 "Mus musc RefSeq   | 6.652638 | 5.253413 | 2.637599 | 1141 |
| TC1700001 Dync2li1 | NM_17225 "Mus musc RefSeq   | 6.499265 | 5.100694 | 2.636403 | 1142 |
| TC1700001 Ltbp1    | NM_01991 "Mus musc RefSeq   | 8.493542 | 7.095114 | 2.636142 | 1143 |
| TC0200000 B3galt1  | NM_02028 "Mus musc RefSeq   | 4.97519  | 3.577369 | 2.635033 | 1144 |
| TC1200001 Scin     | NM_00114 "Mus musc RefSeq   | 5.098006 | 3.700494 | 2.634469 | 1145 |
| TC1400001 Gm3685   | XM_00147 "PREDICTEI RefSeq  | 3.663879 | 5.06064  | -2.6331  | 1146 |
| TC0200003 Sestd1   | NM_17546 "Mus musc RefSeq   | 7.867025 | 6.470332 | 2.632973 | 1147 |
| TC0300002 Myoz2    | NM_02150 "Mus musc RefSeq   | 5.727134 | 7.123461 | -2.63231 | 1148 |
| TC1400001 Kcnk5    | NM_02154 "Mus musc RefSeq   | 5.528655 | 4.1326   | 2.631809 | 1149 |
| TC0500001 Fscn1    | NM_00798 "Mus musc RefSeq   | 7.400439 | 8.79625  | -2.63136 | 1150 |
| TC0900003 Nbeal2   | NM_18327 "Mus musc RefSeq   | 5.866152 | 7.260537 | -2.62877 | 1151 |
| TC0800001 Car7     | NM_05307 "Mus musc RefSeq   | 6.414526 | 7.808644 | -2.62828 | 1152 |
| TC0700004 Igf2     | NM_00112 "Mus musc RefSeq   | 6.218912 | 7.61292  | -2.62808 | 1153 |
| TC1200001 Prkar2b  | NM_01115 "Mus musc RefSeq   | 5.863514 | 4.47013  | 2.626941 | 1154 |
| TC0700003 Cpeb1    | NM_00775 "Mus musc RefSeq   | 5.60923  | 4.215858 | 2.62692  | 1155 |
| TC0100000 Fam117b  | NM_00103 "Mus musc RefSeq   | 7.615116 | 9.00838  | -2.62672 | 1156 |
| TC0X00000 Fhl1     | NM_01021 "Mus musc RefSeq   | 8.479943 | 7.087268 | 2.625651 | 1157 |
| TC0X00000 Aff2     | NM_00803 "Mus musc RefSeq   | 5.264736 | 3.872234 | 2.625336 | 1158 |
| TC1100001 Trim25   | NM_00954 "Mus musc RefSeq   | 7.03963  | 8.43209  | -2.62526 | 1159 |
| TC0200002 Id1      | NM_01049 "Mus musc RefSeq   | 9.248682 | 10.64104 | -2.62507 | 1160 |
| TC0100001 Plxna2   | NM_00888 "Mus musc RefSeq   | 7.971632 | 9.363466 | -2.62412 | 1161 |
| TC0300001 Arhgap29 | NM_17252 "Mus musc RefSeq   | 8.112219 | 9.503634 | -2.62336 | 1162 |
| TC1400001 Gm3542   | ENSMUST0 cdna:putat ENSEMBL | 4.231548 | 5.622326 | -2.6222  | 1163 |
| TC1400001 Gm9603   | ENSMUST0 cdna:putat ENSEMBL | 4.231548 | 5.622326 | -2.6222  | 1163 |
| TC1300000 Akr1c19  | NM_00101 "Mus musc RefSeq   | 3.826478 | 5.216692 | -2.62118 | 1165 |
| TC0400003 Nipal3   | NM_02899 "Mus musc RefSeq   | 6.0082   | 7.397696 | -2.61987 | 1166 |
| TC0500002 Stk32b   | NM_02241 "Mus musc RefSeq   | 6.097983 | 4.70894  | 2.619049 | 1167 |
| TC0900003 Stt3b    | NM_02422 "Mus musc RefSeq   | 9.123231 | 7.73497  | 2.61763  | 1168 |
| TC0400002 Mup19    | NM_00113 "Mus musc RefSeq   | 5.077458 | 3.689318 | 2.61741  | 1169 |
| TC0600003 Ntf3     | NM_00116 "Mus musc RefSeq   | 5.08039  | 6.46283  | -2.60709 | 1170 |
| TC0600002 Ptn      | NM_00897 "Mus musc RefSeq   | 5.62877  | 4.246938 | 2.605991 | 1171 |
| TC0200003 Fkbp7    | NM_01022 "Mus musc RefSeq   | 7.099061 | 5.719017 | 2.602763 | 1172 |
| TC0700003 Man2a2   | NM_17290 "Mus musc RefSeq   | 8.207996 | 6.829379 | 2.60019  | 1173 |
| TC1300001 Plk2     | NM_15280 "Mus musc RefSeq   | 9.382307 | 10.76066 | -2.59971 | 1174 |

|                     |                             |          |          |          |      |
|---------------------|-----------------------------|----------|----------|----------|------|
| TC1200001 Ifrd1     | NM_01356 "Mus musc RefSeq   | 8.923821 | 7.545719 | 2.599262 | 1175 |
| TC0200001 Olfr1033  | NM_14657 "Mus musc RefSeq   | 4.217257 | 2.840442 | 2.596944 | 1176 |
| TC0700002 Scn1b     | NM_01132 "Mus musc RefSeq   | 8.233791 | 6.857282 | 2.596393 | 1177 |
| TC1400001 Bmp4      | NM_00755 "Mus musc RefSeq   | 9.077081 | 7.703006 | 2.592017 | 1178 |
| TC1900001 Sgms1     | NM_00116 "Mus musc RefSeq   | 6.5512   | 7.923074 | -2.58807 | 1179 |
| TC1100004 Cyth1     | NM_00111 "Mus musc RefSeq   | 7.036789 | 8.408595 | -2.58794 | 1180 |
| TC0600000 Abcg2     | NM_01192 "Mus musc RefSeq   | 6.544433 | 7.914926 | -2.58559 | 1181 |
| TC1200001 Hdac9     | NM_00127 "Mus musc RefSeq   | 4.57896  | 5.949164 | -2.58507 | 1182 |
| TC1100000 Wscd1     | NM_17761 "Mus musc RefSeq   | 5.826596 | 7.195645 | -2.583   | 1183 |
| TC0600003 Hebpb1    | NM_01354 "Mus musc RefSeq   | 6.204073 | 4.835349 | 2.582421 | 1184 |
| TC1700001 Dll1      | NM_00786 "Mus musc RefSeq   | 5.711252 | 7.07994  | -2.58236 | 1185 |
| TC0700002 Cpt1c     | NM_15367 "Mus musc RefSeq   | 6.383777 | 5.017793 | 2.577521 | 1186 |
| TC1500000 Ptp4a3    | NM_00116 "Mus musc RefSeq   | 7.481096 | 8.846176 | -2.57591 | 1187 |
| TC0X00003 Mospd2    | NM_02973 "Mus musc RefSeq   | 6.189667 | 7.552004 | -2.57101 | 1188 |
| TC0300001 Gbp5      | NM_15356 "Mus musc RefSeq   | 5.873593 | 7.235551 | -2.57034 | 1189 |
| TC0100003 Cadm3     | NM_05319 "Mus musc RefSeq   | 6.235504 | 4.873754 | 2.569967 | 1190 |
| TC0900001 9230110C1 | NM_19901 "Mus musc RefSeq   | 5.001237 | 3.64134  | 2.566669 | 1191 |
| TC0100003 Fmo1      | NM_01023 "Mus musc RefSeq   | 8.539798 | 9.8996   | -2.5665  | 1192 |
| TC0500000 Pi4k2b    | NM_02595 "Mus musc RefSeq   | 5.445465 | 4.087033 | 2.564064 | 1193 |
| TC0800002 Fam149a   | NM_15353 "Mus musc RefSeq   | 7.147619 | 5.789741 | 2.563079 | 1194 |
| TC1200001 Kif26a    | NM_00109 "Mus musc RefSeq   | 6.634831 | 7.992425 | -2.56258 | 1195 |
| TC1400002 Efs       | NM_01011 "Mus musc RefSeq   | 6.840026 | 5.482761 | 2.56199  | 1196 |
| TC1900000 Tmem2     | NM_00103 "Mus musc RefSeq   | 5.953046 | 7.31002  | -2.56147 | 1197 |
| TC0200004 Tspan18   | NM_18318 "Mus musc RefSeq   | 7.787935 | 9.142917 | -2.55794 | 1198 |
| TC1000002 Fabp3-ps1 | ENSMUST0 cdna:know ENSEMBL  | 7.246328 | 8.599867 | -2.55538 | 1199 |
| TC0400002 Mup15     | NM_00120 "Mus musc RefSeq   | 4.684852 | 3.331409 | 2.555212 | 1200 |
| TC0300000 Phf17     | NM_00113 "Mus musc RefSeq   | 8.08544  | 6.732187 | 2.554876 | 1201 |
| TC0100003 Mnda      | NM_00103 "Mus musc RefSeq   | 8.604754 | 7.251709 | 2.554507 | 1202 |
| TC1300000 Mboat1    | NM_15354 "Mus musc RefSeq   | 5.07572  | 3.722791 | 2.554302 | 1203 |
| TC0800002 Cdh11     | NM_00986 "Mus musc RefSeq   | 7.278288 | 5.92547  | 2.554105 | 1204 |
| TC1000001 Ndufa4l2  | NM_00109 "Mus musc RefSeq   | 7.743089 | 6.390498 | 2.553703 | 1205 |
| TC1900000 Ctsf      | NM_01986 "Mus musc RefSeq   | 7.338468 | 5.985928 | 2.553613 | 1206 |
| TC1800001 Adrb2     | NM_00742 "Mus musc RefSeq   | 6.36962  | 7.721752 | -2.55289 | 1207 |
| TC1900000 Tmem252   | NM_18316 "Mus musc RefSeq   | 4.856931 | 6.208891 | -2.55259 | 1208 |
| TC1800000 Lims2     | NM_14486 "Mus musc RefSeq   | 9.669333 | 11.02029 | -2.55081 | 1209 |
| TC0700001 Fzd4      | NM_00805 "Mus musc RefSeq   | 8.618806 | 9.969599 | -2.55052 | 1210 |
| TC0200002 Wisp2     | NM_01687 "Mus musc RefSeq   | 7.335703 | 5.985163 | 2.550076 | 1211 |
| TC0X00000 AA414768  | NM_00127 "Mus musc RefSeq   | 4.663055 | 3.31453  | 2.546516 | 1212 |
| TC0900000 Casp4     | NM_00760 "Mus musc RefSeq   | 7.651723 | 6.303265 | 2.546398 | 1213 |
| TC0300001 Ttll7     | NM_02759 "Mus musc RefSeq   | 5.550891 | 6.898037 | -2.54408 | 1214 |
| TC1900000 Atrnl1    | NM_18141 "Mus musc RefSeq   | 8.912566 | 7.566341 | 2.54246  | 1215 |
| TC0700001 Pak1      | NM_01103 "Mus musc RefSeq   | 5.175825 | 3.830305 | 2.541218 | 1216 |
| TC0Y00000 G5300110i | ENSMUST0 cdna:know ENSEMBL  | 9.114132 | 7.769188 | 2.540203 | 1217 |
| TC0Y00000 G5300110i | ENSMUST0 cdna:know ENSEMBL  | 9.114132 | 7.769188 | 2.540203 | 1217 |
| TC0400003 Zdhhc18   | NM_00101 "Mus musc RefSeq   | 7.173399 | 8.518315 | -2.54015 | 1219 |
| TC1400002 Gm21560   | XM_00368 "PREDICTEI RefSeq  | 4.206519 | 5.550212 | -2.538   | 1220 |
| TC1400002 Gm3512    | ENSMUST0 cdna:putat ENSEMBL | 5.57209  | 6.915189 | -2.53696 | 1221 |

|                    |                              |          |          |          |      |
|--------------------|------------------------------|----------|----------|----------|------|
| TC1500001 Trps1    | NM_03200 "Mus musc RefSeq    | 7.124343 | 5.781597 | 2.536336 | 1222 |
| TC0700003 Ntrk3    | NM_00874 "Mus musc RefSeq    | 5.475889 | 4.133208 | 2.536222 | 1223 |
| TC0400000 Mmp16    | NM_01972 "Mus musc RefSeq    | 4.839577 | 3.497661 | 2.534877 | 1224 |
| TC1400000 Gm8159   | XM_98454 "PREDICTEI RefSeq   | 4.49736  | 5.839219 | -2.53478 | 1225 |
| TC1300002 Ror2     | NM_01384 "Mus musc RefSeq    | 6.253315 | 4.911688 | 2.53437  | 1226 |
| TC1700000 MlIt4    | NM_01080 "Mus musc RefSeq    | 7.832149 | 9.173104 | -2.53319 | 1227 |
| TC0700001 Ptpre    | NM_01121 "Mus musc RefSeq    | 4.941361 | 6.281212 | -2.53125 | 1228 |
| TC0100000 Cxcr7    | NM_00772 "Mus musc RefSeq    | 8.680507 | 7.34072  | 2.531139 | 1229 |
| TC1000000 Gm5423   | ENSMUST0 cdna:know ENSEMBL   | 6.64454  | 7.983307 | -2.52935 | 1230 |
| TC0700003 Trim30a  | NM_00909 "Mus musc RefSeq    | 6.695313 | 8.033732 | -2.52874 | 1231 |
| TC1300002 Hexb     | NM_01042 "Mus musc RefSeq    | 8.121444 | 6.783034 | 2.528725 | 1232 |
| TC0700001 Olfr550  | ENSMUST0 cdna:know ENSEMBL   | 5.483721 | 4.145644 | 2.528141 | 1233 |
| TC1100004 Rhbdf2   | NM_00116 "Mus musc RefSeq    | 6.479123 | 7.817185 | -2.52812 | 1234 |
| TC1000002 Srgn     | NM_01115 "Mus musc RefSeq    | 7.423793 | 8.761301 | -2.52714 | 1235 |
| TC0400001 Ctnnbip1 | NM_02346 "Mus musc RefSeq    | 7.461148 | 8.798129 | -2.52622 | 1236 |
| TC0100002 Igfbp5   | NM_01051 "Mus musc RefSeq    | 8.520207 | 7.184016 | 2.524838 | 1237 |
| TC0700004 Pik3c2a  | NM_01108 "Mus musc RefSeq    | 6.938466 | 8.273916 | -2.52354 | 1238 |
| TC1400002 Myh6     | NM_01085 "Mus musc RefSeq    | 6.428762 | 7.763106 | -2.52161 | 1239 |
| TC0800000 Comp     | NM_01668 "Mus musc RefSeq    | 6.81101  | 5.476804 | 2.521367 | 1240 |
| TC1100001 Mmd      | NM_02617 "Mus musc RefSeq    | 4.408295 | 5.738851 | -2.515   | 1241 |
| TC1300000 Sfrp4    | NM_01668 "Mus musc RefSeq    | 5.095708 | 3.766472 | 2.512696 | 1242 |
| TC1000002 Slc16a10 | NM_00111 "Mus musc RefSeq    | 5.654632 | 4.325491 | 2.51253  | 1243 |
| TC1100001 Rtn4rl1  | NM_17770 "Mus musc RefSeq    | 6.241754 | 4.915729 | 2.507109 | 1244 |
| TC1700002 Fez2     | NM_00128 "fasciculati RefSeq | 7.7505   | 9.076433 | -2.50695 | 1245 |
| TC0400003 Ptprf    | NM_01121 "Mus musc RefSeq    | 6.334694 | 5.00911  | 2.506343 | 1246 |
| TC0800000 Zfp703   | NM_00111 "Mus musc RefSeq    | 7.465322 | 6.141486 | 2.503308 | 1247 |
| TC0200000 Acvr2a   | NM_00739 "Mus musc RefSeq    | 6.287195 | 7.610991 | -2.50324 | 1248 |
| TC0900000 Ldlr     | NM_01070 "Mus musc RefSeq    | 7.519634 | 6.195896 | 2.503138 | 1249 |
| TC0700004 Vkorc1   | NM_17860 "Mus musc RefSeq    | 9.64973  | 8.327067 | 2.501274 | 1250 |
| TC0200004 1110051M | NM_17512 "Mus musc RefSeq    | 5.357374 | 4.034951 | 2.500858 | 1251 |
| TC4_JH584 CR974586 | ENSMUST0 cdna:novel ENSEMBL  | 7.137424 | 5.815993 | 2.499139 | 1252 |
| TC0600000 Ggcx     | NM_01980 "Mus musc RefSeq    | 8.769258 | 7.449622 | 2.496031 | 1253 |
| TC1100004 Igtp     | NM_01873 "Mus musc RefSeq    | 7.245449 | 8.562299 | -2.49122 | 1254 |
| TC1000002 Slc35e3  | NM_02987 "Mus musc RefSeq    | 7.213276 | 5.897471 | 2.489412 | 1255 |
| TC0100001 Slc30a1  | NM_00957 "Mus musc RefSeq    | 6.781169 | 8.09685  | -2.4892  | 1256 |
| TC0900002 Sorl1    | NM_01143 "Mus musc RefSeq    | 5.667287 | 4.3521   | 2.488346 | 1257 |
| TC1200000 Rgs6     | NM_01581 "Mus musc RefSeq    | 6.060283 | 4.745337 | 2.48793  | 1258 |
| TC1600001 Parp14   | NM_00103 "Mus musc RefSeq    | 7.122589 | 8.436976 | -2.48697 | 1259 |
| TC1000000 Pln      | NM_00114 "Mus musc RefSeq    | 6.717557 | 8.029895 | -2.48344 | 1260 |
| TC1800001 Tmem173  | NM_02826 "Mus musc RefSeq    | 7.144464 | 8.456651 | -2.48318 | 1261 |
| TC1600002 Tiam1    | NM_00114 "Mus musc RefSeq    | 6.030474 | 4.719602 | 2.480914 | 1262 |
| TC0400004 Mup7     | NM_00113 "Mus musc RefSeq    | 5.203318 | 3.893007 | 2.47995  | 1263 |
| TC1000001 Wif1     | NM_01191 "Mus musc RefSeq    | 6.274677 | 4.964427 | 2.479845 | 1264 |
| TC1100003 Nlk      | NM_00870 "Mus musc RefSeq    | 6.501705 | 7.81142  | -2.47893 | 1265 |
| TC0400001 Casz1    | NM_02719 "Mus musc RefSeq    | 5.619552 | 6.928034 | -2.47681 | 1266 |
| TC1100000 Grap     | NM_02781 "Mus musc RefSeq    | 6.484347 | 7.792716 | -2.47661 | 1267 |
| TC0700003 Capn5    | NM_00760 "Mus musc RefSeq    | 7.042232 | 5.734022 | 2.476341 | 1268 |

|                     |                            |          |          |          |      |
|---------------------|----------------------------|----------|----------|----------|------|
| TC0100000 Gmppa     | NM_13370 "Mus musc RefSeq  | 7.971966 | 6.664798 | 2.474553 | 1269 |
| TC1200001 Rnf144a   | NM_08056 "Mus musc RefSeq  | 7.098525 | 8.404927 | -2.47324 | 1270 |
| TC1900001 Asah2     | NM_01883 "Mus musc RefSeq  | 6.675326 | 7.981274 | -2.47246 | 1271 |
| TC0200003 Dpp7      | NM_03184 "Mus musc RefSeq  | 6.715485 | 5.410227 | 2.471279 | 1272 |
| TC1700002 Vegfa     | NM_00111 "Mus musc RefSeq  | 8.171797 | 6.866972 | 2.470538 | 1273 |
| TC0100000 Sp100     | NM_01367 "Mus musc RefSeq  | 7.573253 | 8.877803 | -2.47007 | 1274 |
| TC1300001 Adamts6   | NM_00108 "Mus musc RefSeq  | 5.93883  | 4.634394 | 2.469872 | 1275 |
| TC1200002 Ltbp2     | NM_01358 "Mus musc RefSeq  | 6.687672 | 5.383905 | 2.468726 | 1276 |
| TC1000001 Utrn      | NM_01168 "Mus musc RefSeq  | 8.202138 | 9.504841 | -2.46691 | 1277 |
| TC0X00002 G6pdx     | NM_00806 "Mus musc RefSeq  | 8.382437 | 7.079802 | 2.46679  | 1278 |
| TC1900000 Casp7     | NM_00761 "Mus musc RefSeq  | 6.40384  | 7.70617  | -2.46627 | 1279 |
| TC0500002 Gbp11     | NM_00103 "Mus musc RefSeq  | 7.027078 | 8.329292 | -2.46607 | 1280 |
| TC1200001 Ralgapa1  | NM_00111 "Mus musc RefSeq  | 7.67013  | 8.972285 | -2.46597 | 1281 |
| TC0700000 Pnmal2    | NM_00109 "Mus musc RefSeq  | 5.542528 | 4.241733 | 2.463646 | 1282 |
| TC1900000 Hhex      | NM_00824 "Mus musc RefSeq  | 4.390415 | 5.690851 | -2.46303 | 1283 |
| TC0400003 Nkain1    | NM_02599 "Mus musc RefSeq  | 6.071475 | 4.77131  | 2.46257  | 1284 |
| TC0300002 Gucy1b3   | NM_01746 "Mus musc RefSeq  | 7.938119 | 6.638063 | 2.462384 | 1285 |
| TC0300000 Sfrp2     | NM_00914 "Mus musc RefSeq  | 7.012663 | 5.713011 | 2.461695 | 1286 |
| TC0500003 Gbp8      | NM_02950 "Mus musc RefSeq  | 5.891966 | 7.191434 | -2.46138 | 1287 |
| TC0100002 Rnf152    | NM_00116 "Mus musc RefSeq  | 4.455218 | 5.754499 | -2.46106 | 1288 |
| TC1800000 Zadh2     | NM_14609 "Mus musc RefSeq  | 7.100507 | 5.801521 | 2.460559 | 1289 |
| TC0X00001 Fancb     | NM_17502 "Mus musc RefSeq  | 3.953697 | 5.25195  | -2.45931 | 1290 |
| TC1900001 Stx3      | NM_01150 "Mus musc RefSeq  | 6.220345 | 7.518405 | -2.45898 | 1291 |
| TC0900002 Tmod2     | NM_00103 "Mus musc RefSeq  | 6.38246  | 5.084482 | 2.45884  | 1292 |
| TC1000002 Adamts15  | NM_00111 "Mus musc RefSeq  | 6.749619 | 5.451931 | 2.458346 | 1293 |
| TC1700001 Crim1     | NM_01580 "Mus musc RefSeq  | 7.743125 | 9.040258 | -2.4574  | 1294 |
| TC1300001 Epdr1     | NM_13406 "Mus musc RefSeq  | 5.764578 | 4.467551 | 2.45722  | 1295 |
| TC0200002 Cds2      | NM_13865 "Mus musc RefSeq  | 8.093665 | 9.389254 | -2.45477 | 1296 |
| TC0X00002 Smarca1   | NM_05312 "Mus musc RefSeq  | 4.555386 | 3.261653 | 2.451616 | 1297 |
| TC0300001 Gbp3      | NM_00128 "guanylate RefSeq | 6.747841 | 8.040803 | -2.45031 | 1298 |
| TC0600003 Adipor2   | NM_19798 "Mus musc RefSeq  | 6.597518 | 7.889972 | -2.44944 | 1299 |
| TC1600000 Glis2     | NM_03118 "Mus musc RefSeq  | 7.833236 | 6.541195 | 2.448742 | 1300 |
| TC0700000 Brsk1     | NM_00116 "Mus musc RefSeq  | 6.308505 | 5.0167   | 2.448342 | 1301 |
| TC0400002 Ccl19     | NM_01188 "Mus musc RefSeq  | 5.713768 | 4.422644 | 2.447186 | 1302 |
| TC0300001 Slc44a5   | NM_00108 "Mus musc RefSeq  | 3.331209 | 4.62206  | -2.44672 | 1303 |
| TC0X00001 Clcn5     | NM_01669 "Mus musc RefSeq  | 6.201264 | 4.91069  | 2.446254 | 1304 |
| TC1500001 Fam84b    | NM_00116 "Mus musc RefSeq  | 6.17912  | 7.46839  | -2.44404 | 1305 |
| TC1400002 Ripk3     | NM_00116 "Mus musc RefSeq  | 5.962218 | 7.251438 | -2.44396 | 1306 |
| TC0900003 Uba7      | NM_02373 "Mus musc RefSeq  | 6.622426 | 7.911015 | -2.44289 | 1307 |
| TC0900000 Bace1     | NM_01179 "Mus musc RefSeq  | 7.129157 | 5.84075  | 2.442582 | 1308 |
| TC1300000 Nid1      | NM_01091 "Mus musc RefSeq  | 11.18226 | 9.894317 | 2.4418   | 1309 |
| TC0700004 Sigirr    | NM_02305 "Mus musc RefSeq  | 5.55439  | 6.842003 | -2.44124 | 1310 |
| TC0500003 2900026AC | NM_17288 "Mus musc RefSeq  | 6.566119 | 7.852392 | -2.43897 | 1311 |
| TC1000002 Gstt2     | NM_01036 "Mus musc RefSeq  | 5.999972 | 7.285566 | -2.43782 | 1312 |
| TC0800001 Fam65a    | NM_00108 "Mus musc RefSeq  | 7.878545 | 9.16395  | -2.43751 | 1313 |
| TC1300002 Arsk      | NM_02984 "Mus musc RefSeq  | 7.357827 | 6.072738 | 2.436971 | 1314 |
| TC0300002 Rapgef2   | NM_00109 "Mus musc RefSeq  | 7.76812  | 9.053007 | -2.43663 | 1315 |

|                    |                            |          |          |          |      |
|--------------------|----------------------------|----------|----------|----------|------|
| TC1500001 Dip2b    | NM_00115 "Mus musc RefSeq  | 6.58672  | 7.871362 | -2.43622 | 1316 |
| TC0800002 Arhgap10 | NM_03011 "Mus musc RefSeq  | 8.102784 | 6.818738 | 2.43521  | 1317 |
| TC1200002 Wars     | NM_00116 "Mus musc RefSeq  | 6.897447 | 8.180729 | -2.43392 | 1318 |
| TC0600001 Samd9l   | NM_01015 "Mus musc RefSeq  | 6.325247 | 7.607596 | -2.43235 | 1319 |
| TC1000000 Fstl3    | NM_03138 "Mus musc RefSeq  | 7.597317 | 6.315152 | 2.432037 | 1320 |
| TC0700002 Fosb     | NM_00803 "Mus musc RefSeq  | 10.93843 | 9.657574 | 2.429831 | 1321 |
| TC0500001 Cdk8     | NM_15359 "Mus musc RefSeq  | 8.015238 | 6.735016 | 2.428763 | 1322 |
| TC0700000 Lgi4     | NM_14455 "Mus musc RefSeq  | 5.960921 | 4.680924 | 2.428385 | 1323 |
| TC0700001 Trim34a  | NM_03068 "Mus musc RefSeq  | 5.928802 | 7.207612 | -2.42639 | 1324 |
| TC1000000 Adora2a  | NM_00963 "Mus musc RefSeq  | 7.196293 | 8.474473 | -2.42533 | 1325 |
| TC0500002 Fndc4    | NM_02242 "Mus musc RefSeq  | 6.415595 | 5.137578 | 2.425054 | 1326 |
| TC0600000 Gng11    | NM_02533 "Mus musc RefSeq  | 6.528447 | 7.806021 | -2.42431 | 1327 |
| TC1100001 Camkk1   | NM_01888 "Mus musc RefSeq  | 6.339598 | 5.064899 | 2.419483 | 1328 |
| TC0400002 Gm12407  | XM_00147 "PREDICTEI RefSeq | 6.66445  | 5.390167 | 2.418786 | 1329 |
| TC1300002 Nfil3    | NM_01737 "Mus musc RefSeq  | 7.251984 | 5.978446 | 2.417537 | 1330 |
| TC0700002 Apoe     | NM_00969 "Mus musc RefSeq  | 9.221473 | 7.948366 | 2.416815 | 1331 |
| TC1100000 C1qtnf2  | NM_02697 "Mus musc RefSeq  | 7.447407 | 6.174836 | 2.415917 | 1332 |
| TC0400003 Rps6ka1  | NM_00909 "Mus musc RefSeq  | 5.549266 | 6.821544 | -2.41543 | 1333 |
| TC0200005 Samhd1   | NM_01885 "Mus musc RefSeq  | 7.789358 | 9.061212 | -2.41472 | 1334 |
| TC0800000 Tbc1d9   | NM_00111 "Mus musc RefSeq  | 5.537296 | 6.80909  | -2.41462 | 1335 |
| TC1700002 Rsph9    | NM_02933 "Mus musc RefSeq  | 5.236346 | 3.964805 | 2.414193 | 1336 |
| TC1600000 Hcls1    | NM_00822 "Mus musc RefSeq  | 5.544351 | 6.815632 | -2.41376 | 1337 |
| TC0400001 Sync     | NM_02348 "Mus musc RefSeq  | 6.966336 | 5.695961 | 2.412243 | 1338 |
| TC1300001 Shc3     | BC105645 "Mus musc GenBank | 5.972814 | 4.702817 | 2.411611 | 1339 |
| TC0900001 Col5a3   | NM_01691 "Mus musc RefSeq  | 7.277997 | 6.008014 | 2.411587 | 1340 |
| TC1700000 Adamts10 | NM_17261 "Mus musc RefSeq  | 8.768578 | 7.498612 | 2.411559 | 1341 |
| TC0600000 Tes      | NM_20717 "Mus musc RefSeq  | 4.63594  | 5.903529 | -2.40759 | 1342 |
| TC0600001 Golt1b   | NM_02587 "Mus musc RefSeq  | 7.115557 | 5.849432 | 2.405147 | 1343 |
| TC0X00002 Maged1   | NM_01979 "Mus musc RefSeq  | 8.165205 | 6.89982  | 2.403914 | 1344 |
| TC0300003 Ptgfr    | NM_00896 "Mus musc RefSeq  | 5.533327 | 4.268311 | 2.403299 | 1345 |
| TC0200004 Dgkz     | NM_13830 "Mus musc RefSeq  | 6.346216 | 7.608784 | -2.39922 | 1346 |
| TC1000000 Gadd45b  | NM_00865 "Mus musc RefSeq  | 10.39201 | 9.130435 | 2.397567 | 1347 |
| TC1700000 Abcg1    | NM_00959 "Mus musc RefSeq  | 5.972426 | 7.233227 | -2.39629 | 1348 |
| TC0600001 Tspan12  | NM_17300 "Mus musc RefSeq  | 8.096897 | 9.356417 | -2.39416 | 1349 |
| TC0100000 Gm9947   | ENSMUST0 cdna:know ENSEMBL | 5.775096 | 4.516186 | 2.393149 | 1350 |
| TC0400000 Musk     | NM_00116 "Mus musc RefSeq  | 5.113082 | 3.854621 | 2.392404 | 1351 |
| TC0300000 Skil     | NM_00127 "Mus musc RefSeq  | 8.937152 | 7.679591 | 2.390912 | 1352 |
| TC1100000 8-Sep    | NM_03314 "Mus musc RefSeq  | 9.262613 | 8.006674 | 2.388225 | 1353 |
| TC1800001 B4galt6  | NM_01973 "Mus musc RefSeq  | 5.925739 | 4.671356 | 2.385651 | 1354 |
| TC1300002 Parp8    | NM_00108 "Mus musc RefSeq  | 7.32057  | 6.06634  | 2.385398 | 1355 |
| TC0500003 Trpv4    | NM_02201 "Mus musc RefSeq  | 5.596396 | 6.850122 | -2.38457 | 1356 |
| TC1100000 Xaf1     | NM_00103 "Mus musc RefSeq  | 6.877385 | 8.12749  | -2.37859 | 1357 |
| TC0600000 Tmem140  | NM_19798 "Mus musc RefSeq  | 6.932846 | 8.180504 | -2.37456 | 1358 |
| TC0400000 Rgp1     | NM_17286 "Mus musc RefSeq  | 6.746569 | 7.991957 | -2.37082 | 1359 |
| TC1500001 Tspyl5   | NM_00108 "Mus musc RefSeq  | 5.706477 | 4.461161 | 2.370705 | 1360 |
| TC0300002 Ccdc109b | NM_02577 "Mus musc RefSeq  | 6.811631 | 5.566874 | 2.369786 | 1361 |
| TC0400000 Tmem64   | NM_18140 "Mus musc RefSeq  | 9.413402 | 8.169379 | 2.368581 | 1362 |

|                     |                              |          |          |          |      |
|---------------------|------------------------------|----------|----------|----------|------|
| TC0700004 Igsf6     | NM_03069 "Mus musc RefSeq    | 3.788611 | 5.031582 | -2.36685 | 1363 |
| TC1700002 Cdc42ep3  | NM_02651 "Mus musc RefSeq    | 7.072666 | 8.314095 | -2.36433 | 1364 |
| TC1900000 Fas       | NM_00114 "Mus musc RefSeq    | 8.056128 | 9.297508 | -2.36425 | 1365 |
| TC0400004 Agrn      | NM_02160 "Mus musc RefSeq    | 7.080744 | 8.322124 | -2.36425 | 1366 |
| TC0800002 Pik3r2    | NM_00884 "Mus musc RefSeq    | 7.197357 | 5.956282 | 2.363746 | 1367 |
| TC0800001 Nod2      | NM_14585 "Mus musc RefSeq    | 5.20995  | 6.450907 | -2.36355 | 1368 |
| TC0500003 Git2      | NM_00107 "Mus musc RefSeq    | 7.995013 | 9.235535 | -2.36284 | 1369 |
| TC0200005 Cables2   | NM_14585 "Mus musc RefSeq    | 6.853976 | 8.094033 | -2.36208 | 1370 |
| TC0X00000 Prickle3  | NM_17509 "Mus musc RefSeq    | 5.551685 | 6.79126  | -2.36129 | 1371 |
| TC1300000 Sfxn1     | NM_02732 "Mus musc RefSeq    | 7.609111 | 6.369682 | 2.361051 | 1372 |
| TC1400001 Gm8356    | ENSMUST0 cdna:putat ENSEMBL  | 2.994242 | 4.232598 | -2.3593  | 1373 |
| TC4_GL456 Gm13298   | NM_00108 "Mus musc RefSeq    | 5.143829 | 3.90607  | 2.358319 | 1374 |
| TC1600001 Fgd4      | NM_13923 "Mus musc RefSeq    | 4.991451 | 3.75577  | 2.354925 | 1375 |
| TC1300002 4930486L2 | NM_17809 "Mus musc RefSeq    | 4.13889  | 5.374385 | -2.35462 | 1376 |
| TC1600000 Cebpd     | NM_00767 "Mus musc RefSeq    | 8.674793 | 7.4402   | 2.35315  | 1377 |
| TC0X00000 Xpnpep2   | NM_13321 "Mus musc RefSeq    | 5.000725 | 3.767183 | 2.351436 | 1378 |
| TC1900000 Ppapdc2   | NM_02892 "Mus musc RefSeq    | 7.201284 | 8.433776 | -2.34973 | 1379 |
| TC0500001 Hip1r     | NM_14507 "Mus musc RefSeq    | 6.274159 | 7.506544 | -2.34955 | 1380 |
| TC1100003 Atp1b2    | NM_01341 "Mus musc RefSeq    | 5.303436 | 6.535366 | -2.34881 | 1381 |
| TC0700000 Mamstr    | NM_17241 "Mus musc RefSeq    | 4.942075 | 6.17305  | -2.34726 | 1382 |
| TC0300001 Pde5a     | NM_15342 "Mus musc RefSeq    | 6.920806 | 5.689862 | 2.347205 | 1383 |
| TC1100002 Zfp354c   | NM_01392 "Mus musc RefSeq    | 6.011364 | 4.780456 | 2.347147 | 1384 |
| TC1600000 Mkl2      | NM_00112 "Mus musc RefSeq    | 7.348723 | 8.579053 | -2.34621 | 1385 |
| TC0600001 Tmem43    | NM_02876 "Mus musc RefSeq    | 9.08627  | 7.856486 | 2.345319 | 1386 |
| TC4_JH584 Ccl27a    | ENSMUST0 cdna:know ENSEMBL   | 5.605183 | 4.376069 | 2.34423  | 1387 |
| TC0100003 C130074G1 | NM_17869 "Mus musc RefSeq    | 6.136804 | 7.362029 | -2.33792 | 1388 |
| TC0700003 Tjp1      | NM_00116 "Mus musc RefSeq    | 9.085101 | 10.30935 | -2.33633 | 1389 |
| TC1800001 Smim3     | NM_13413 "Mus musc RefSeq    | 4.245658 | 3.022013 | 2.33536  | 1390 |
| TC0200001 Ypel4     | NM_00100 "Mus musc RefSeq    | 5.783365 | 4.560949 | 2.333371 | 1391 |
| TC0900000 Siaa      | NM_01173 "Mus musc RefSeq    | 7.510366 | 6.28802  | 2.333258 | 1392 |
| TC0100000 Efhc1     | NM_02797 "Mus musc RefSeq    | 5.577577 | 4.355259 | 2.333213 | 1393 |
| TC0400001 Srm       | NM_00927 "Mus musc RefSeq    | 7.769358 | 6.548517 | 2.330826 | 1394 |
| TC0200004 Bcl2l1    | NM_00128 "BCL2-like : RefSeq | 6.964299 | 8.185114 | -2.33078 | 1395 |
| TC0600003 Klra3     | NM_01064 "Mus musc RefSeq    | 2.924376 | 4.145166 | -2.33074 | 1396 |
| TC1700000 Tnfrsf21  | NM_17858 "Mus musc RefSeq    | 6.212345 | 7.43164  | -2.32833 | 1397 |
| TC0800001 Nrp1      | NM_00873 "Mus musc RefSeq    | 8.748312 | 9.967377 | -2.32796 | 1398 |
| TC0100000 Prex2     | NM_02952 "Mus musc RefSeq    | 8.662829 | 9.879662 | -2.32436 | 1399 |
| TC0300002 S100a1    | NM_01130 "Mus musc RefSeq    | 6.770702 | 7.985109 | -2.32045 | 1400 |
| TC1000000 Ptprk     | NM_00898 "Mus musc RefSeq    | 6.251615 | 7.464157 | -2.31746 | 1401 |
| TC1000001 Samd5     | NM_17727 "Mus musc RefSeq    | 6.422439 | 7.634311 | -2.31638 | 1402 |
| TC0900002 Tmed3     | NM_02536 "Mus musc RefSeq    | 8.078104 | 6.866989 | 2.315165 | 1403 |
| TC1600001 Rogdi     | NM_13318 "Mus musc RefSeq    | 7.751616 | 6.541962 | 2.312822 | 1404 |
| TC1700001 Tmem178   | NM_02651 "Mus musc RefSeq    | 4.613744 | 5.821186 | -2.30928 | 1405 |
| TC0300001 Dram2     | NM_00128 "DNA-dam: RefSeq    | 7.295412 | 8.502377 | -2.30852 | 1406 |
| TC0400001 Gm13242   | NM_00110 "Mus musc RefSeq    | 5.007406 | 6.214079 | -2.30805 | 1407 |
| TC1800000 Malt1     | NM_17283 "Mus musc RefSeq    | 5.374588 | 6.580519 | -2.30686 | 1408 |
| TC1300002 Itga2     | NM_00839 "Mus musc RefSeq    | 5.808413 | 4.603058 | 2.30594  | 1409 |

|                     |                                |          |          |          |      |
|---------------------|--------------------------------|----------|----------|----------|------|
| TC0400001 Nppa      | NM_00872 "Mus musc RefSeq      | 7.092792 | 8.297563 | -2.30501 | 1410 |
| TC0200002 Snai1     | NM_01142 "Mus musc RefSeq      | 7.970755 | 6.76746  | 2.30265  | 1411 |
| TC0800000C Arhgef7  | NM_00111 "Mus musc RefSeq      | 6.885703 | 8.088003 | -2.30106 | 1412 |
| TC0200001 Slc24a5   | NM_17503 "Mus musc RefSeq      | 4.915307 | 3.713213 | 2.300734 | 1413 |
| TC1100001 Tmc8      | NM_00119 "Mus musc RefSeq      | 6.077552 | 7.279358 | -2.30027 | 1414 |
| TC1400001 Lcp1      | NM_00124 "Mus musc RefSeq      | 4.470256 | 5.671695 | -2.29969 | 1415 |
| TC0700004 Osbp15    | NM_00119 "Mus musc RefSeq      | 7.537524 | 6.336798 | 2.298553 | 1416 |
| TC0400002 Tmem245   | NM_17551 "Mus musc RefSeq      | 6.685148 | 7.885631 | -2.29817 | 1417 |
| TC0100003 Hlx       | NM_00825 "Mus musc RefSeq      | 7.244944 | 8.445283 | -2.29794 | 1418 |
| TC1200002 Fbln5     | NM_01181 "Mus musc RefSeq      | 9.914247 | 8.714026 | 2.297749 | 1419 |
| TC0400002 Plekhg5   | NM_00100 "Mus musc RefSeq      | 6.890876 | 8.090922 | -2.29747 | 1420 |
| TC0900002 Pgm3      | NM_02835 "Mus musc RefSeq      | 6.273497 | 5.073763 | 2.296973 | 1421 |
| TC0500000C Emilin1  | NM_13391 "Mus musc RefSeq      | 7.115514 | 5.916496 | 2.295833 | 1422 |
| TC1700001 Clip4     | NM_17537 "Mus musc RefSeq      | 5.877274 | 4.678371 | 2.29565  | 1423 |
| TC0400004 LOC100861 | XM_00368 "PREDICTED MGI/Jacksc | 4.599165 | 3.400623 | 2.295076 | 1424 |
| TC0800001 Cx3cl1    | NM_00914 "Mus musc RefSeq      | 6.067828 | 7.266289 | -2.29495 | 1425 |
| TC0200002 Fam217b   | NM_00108 "Mus musc RefSeq      | 5.034005 | 6.231612 | -2.29359 | 1426 |
| TC1600000C Fam43a   | NM_17763 "Mus musc RefSeq      | 6.41475  | 7.611995 | -2.29301 | 1427 |
| TC0X00002 Frmd7     | NM_00119 "Mus musc RefSeq      | 4.258809 | 3.061643 | 2.292888 | 1428 |
| TC0200004 Actc1     | NM_00960 "Mus musc RefSeq      | 7.866118 | 9.062849 | -2.2922  | 1429 |
| TC0500003 Lnx2      | NM_08079 "Mus musc RefSeq      | 7.856975 | 9.053331 | -2.2916  | 1430 |
| TC0100000C Gal3st2  | NM_19936 "Mus musc RefSeq      | 6.306142 | 5.109917 | 2.291393 | 1431 |
| TC0500003 Clip2     | NM_00999 "Mus musc RefSeq      | 8.362016 | 7.165924 | 2.291182 | 1432 |
| TC1600000C Lsamp    | NM_17554 "Mus musc RefSeq      | 5.307939 | 4.112145 | 2.290709 | 1433 |
| TC0X00000C Xiap     | NM_00968 "Mus musc RefSeq      | 6.209655 | 7.405411 | -2.29065 | 1434 |
| TC1600001 Phldb2    | NM_00125 "Mus musc RefSeq      | 6.025744 | 7.221499 | -2.29065 | 1435 |
| TC1100003 Dusp3     | NM_02820 "Mus musc RefSeq      | 8.680418 | 9.876037 | -2.29043 | 1436 |
| TC1900000C Fads1    | NM_14609 "Mus musc RefSeq      | 8.697194 | 7.502481 | 2.288993 | 1437 |
| TC0200002 Sstr4     | NM_00921 "Mus musc RefSeq      | 5.375456 | 6.570037 | -2.28878 | 1438 |
| TC1600001 Nfkbiz    | NM_00115 "Mus musc RefSeq      | 9.324924 | 8.131687 | 2.286652 | 1439 |
| TC1800001 Zfp521    | NM_14549 "Mus musc RefSeq      | 7.719044 | 6.526894 | 2.28493  | 1440 |
| TC0800001 Zfpm1     | NM_00956 "Mus musc RefSeq      | 6.422899 | 7.613419 | -2.28235 | 1441 |
| TC1000001 Dusp6     | NM_02626 "Mus musc RefSeq      | 8.043615 | 9.234014 | -2.28216 | 1442 |
| TC0800000C Ddx60    | NM_00108 "Mus musc RefSeq      | 4.800434 | 5.989964 | -2.28078 | 1443 |
| TC1000001 Csrp2     | NM_00779 "Mus musc RefSeq      | 8.581775 | 7.392893 | 2.27976  | 1444 |
| TC1300002 Rgs7bp    | NM_02987 "Mus musc RefSeq      | 3.738624 | 4.92715  | -2.2792  | 1445 |
| TC1200002 Rps6kl1   | NM_14624 "Mus musc RefSeq      | 5.521488 | 6.709129 | -2.2778  | 1446 |
| TC1100002 Stc2      | NM_01149 "Mus musc RefSeq      | 5.668674 | 4.481357 | 2.277288 | 1447 |
| TC0100003 Nenf      | NM_02542 "Mus musc RefSeq      | 7.648054 | 6.460771 | 2.277235 | 1448 |
| TC0600001 Cand2     | NM_02595 "Mus musc RefSeq      | 6.130764 | 4.944063 | 2.276316 | 1449 |
| TC0600000C Prdm5    | NM_02754 "Mus musc RefSeq      | 6.790976 | 5.604559 | 2.275868 | 1450 |
| TC0100000C Aox3     | NM_02361 "Mus musc RefSeq      | 4.621847 | 3.43581  | 2.275269 | 1451 |
| TC0900001 Elovl5    | NM_13425 "Mus musc RefSeq      | 8.945828 | 10.13184 | -2.27522 | 1452 |
| TC0500002 Sorcs2    | NM_03088 "Mus musc RefSeq      | 6.097905 | 4.912236 | 2.274689 | 1453 |
| TC1_GL456 AC168977  | ENSMUST0cdna:novel ENSEMBL     | 6.573976 | 7.758988 | -2.27365 | 1454 |
| TC0400000C Slc44a1  | NM_00115 "Mus musc RefSeq      | 8.988366 | 7.804139 | 2.272416 | 1455 |
| TC1300002 Nkd2      | NM_02818 "Mus musc RefSeq      | 6.356297 | 5.17249  | 2.271755 | 1456 |

|                     |                            |          |          |          |      |
|---------------------|----------------------------|----------|----------|----------|------|
| TC0300000 S100a4    | NM_01131 "Mus musc RefSeq  | 4.890469 | 3.70714  | 2.271002 | 1457 |
| TC1700001 Itfg3     | NM_00120 "Mus musc RefSeq  | 7.661242 | 6.478537 | 2.27002  | 1458 |
| TC0600001 Sgce      | NM_00113 "Mus musc RefSeq  | 7.607545 | 6.425487 | 2.269002 | 1459 |
| TC0600001 Bhlhe40   | NM_01149 "Mus musc RefSeq  | 9.782181 | 8.600747 | 2.268021 | 1460 |
| TC0200005 Pltp      | NM_01112 "Mus musc RefSeq  | 8.968475 | 10.14934 | -2.26713 | 1461 |
| TC0900001 Cish      | NM_00989 "Mus musc RefSeq  | 5.710273 | 6.891112 | -2.26709 | 1462 |
| TC0600003 Kcna5     | NM_14598 "Mus musc RefSeq  | 8.24204  | 9.422665 | -2.26675 | 1463 |
| TC0200002 Plcg1     | NM_02128 "Mus musc RefSeq  | 7.792182 | 8.972701 | -2.26658 | 1464 |
| TC0300003 Fgf2      | NM_00800 "Mus musc RefSeq  | 7.024185 | 5.843978 | 2.266093 | 1465 |
| TC1200001 Gm11042   | ENSMUST0 cdna:know ENSEMBL | 8.59415  | 9.772411 | -2.26304 | 1466 |
| TC1300001 Arsb      | NM_00971 "Mus musc RefSeq  | 7.918929 | 6.741445 | 2.26182  | 1467 |
| TC0600000 Mest      | NM_00125 "Mus musc RefSeq  | 6.519059 | 7.695949 | -2.26089 | 1468 |
| TC1300001 Ccdc125   | NM_00116 "Mus musc RefSeq  | 3.932861 | 5.109542 | -2.26056 | 1469 |
| TC0400003 Grp1      | NM_00109 "Mus musc RefSeq  | 5.683291 | 6.859803 | -2.2603  | 1470 |
| TC0400001 Asap3     | NM_00100 "Mus musc RefSeq  | 6.600296 | 5.424323 | 2.259452 | 1471 |
| TC0700000 Prkcg     | NM_01110 "Mus musc RefSeq  | 6.355897 | 7.530499 | -2.25731 | 1472 |
| TC1_GL456 AC133103. | ENSMUST0 cdna:know ENSEMBL | 7.857897 | 9.032456 | -2.25724 | 1473 |
| TC0200001 Dusp2     | NM_01009 "Mus musc RefSeq  | 5.206481 | 6.380996 | -2.25717 | 1474 |
| TC1200002 Ccdc88c   | NM_02668 "Mus musc RefSeq  | 6.370117 | 7.54403  | -2.25623 | 1475 |
| TC0X00001 Mum1l1    | NM_17554 "Mus musc RefSeq  | 5.115633 | 3.942209 | 2.255464 | 1476 |
| TC1200000 Hpcal1    | NM_01667 "Mus musc RefSeq  | 7.789056 | 8.962287 | -2.25516 | 1477 |
| TC1700001 Tmem204   | NM_00100 "Mus musc RefSeq  | 8.644845 | 9.816621 | -2.25289 | 1478 |
| TC1400000 Gm3115    | XM_00147 "PREDICTEI RefSeq | 3.722682 | 4.893548 | -2.25147 | 1479 |
| TC1100002 Meis1     | NM_01078 "Mus musc RefSeq  | 6.881946 | 5.711111 | 2.25142  | 1480 |
| TC1600001 Slc15a2   | NM_02130 "Mus musc RefSeq  | 4.608465 | 5.779023 | -2.25099 | 1481 |
| TC0500002 Lcorl     | NM_17814 "Mus musc RefSeq  | 4.895682 | 6.065652 | -2.25007 | 1482 |
| TC1300000 Glrx      | NM_05310 "Mus musc RefSeq  | 6.218147 | 5.048378 | 2.249757 | 1483 |
| TC1400001 Gm3476    | XM_00147 "PREDICTEI RefSeq | 3.487108 | 4.65644  | -2.24908 | 1484 |
| TC0X00002 Tspan6    | NM_01965 "Mus musc RefSeq  | 6.890209 | 8.059238 | -2.2486  | 1485 |
| TC1100000 Lif       | NM_00850 "Mus musc RefSeq  | 5.847987 | 4.680534 | 2.246148 | 1486 |
| TC1400002 Slc25a30  | NM_02623 "Mus musc RefSeq  | 6.452289 | 7.618468 | -2.24417 | 1487 |
| TC0200005 B4galt5   | NM_01983 "Mus musc RefSeq  | 7.802956 | 6.637499 | 2.243043 | 1488 |
| TC0700000 Izumo1    | NM_00101 "Mus musc RefSeq  | 5.864618 | 7.029793 | -2.2426  | 1489 |
| TC1200002 Wdr60     | NM_14603 "Mus musc RefSeq  | 5.332755 | 4.16806  | 2.241858 | 1490 |
| TC0600001 Il17ra    | NM_00835 "Mus musc RefSeq  | 6.14787  | 4.983347 | 2.241591 | 1491 |
| TC0100003 Sertad4   | NM_00117 "Mus musc RefSeq  | 6.361762 | 5.198421 | 2.239755 | 1492 |
| TC0200000 Pkn3      | NM_15380 "Mus musc RefSeq  | 5.981704 | 7.14335  | -2.23713 | 1493 |
| TC0600000 Trim24    | NM_14507 "Mus musc RefSeq  | 7.118287 | 8.279476 | -2.23642 | 1494 |
| TC0300000 Kcnn3     | NM_08046 "Mus musc RefSeq  | 5.934191 | 4.773115 | 2.236242 | 1495 |
| TC1500001 Ly6c1     | NM_00125 "Mus musc RefSeq  | 9.555896 | 10.71656 | -2.2356  | 1496 |
| TC0100001 Fmod      | NM_02135 "Mus musc RefSeq  | 5.702973 | 4.542805 | 2.234835 | 1497 |
| TC0100001 Tnnt2     | NM_00113 "Mus musc RefSeq  | 8.02472  | 9.184774 | -2.23466 | 1498 |
| TC0300000 Tnik      | NM_00116 "Mus musc RefSeq  | 5.282575 | 4.123033 | 2.233865 | 1499 |
| TC0200000 Ncs1      | NM_01968 "Mus musc RefSeq  | 5.75269  | 4.593149 | 2.233863 | 1500 |
| TC0400000 Hrct1     | NM_02751 "Mus musc RefSeq  | 5.35191  | 6.511236 | -2.23353 | 1501 |
| TC1100001 Slfn5     | NM_18320 "Mus musc RefSeq  | 7.73274  | 8.891819 | -2.23315 | 1502 |
| TC1700000 Pkd1      | NM_01363 "Mus musc RefSeq  | 9.217723 | 8.059082 | 2.23247  | 1503 |



|                     |                             |          |          |          |      |
|---------------------|-----------------------------|----------|----------|----------|------|
| TC0800001 Slc7a6    | NM_17879 "Mus musc RefSeq   | 6.8883   | 5.729997 | 2.231947 | 1504 |
| TC1600001 Ripply3   | NM_13322 "Mus musc RefSeq   | 6.379127 | 7.53664  | -2.23073 | 1505 |
| TC0100000 Gm7609    | NM_00108 "Mus musc RefSeq   | 5.573126 | 6.729508 | -2.22898 | 1506 |
| TC1500000 Lifr      | NM_00111 "Mus musc RefSeq   | 7.353636 | 8.509974 | -2.22891 | 1507 |
| TC0300002 Npr1      | NM_00872 "Mus musc RefSeq   | 7.443117 | 8.599374 | -2.22878 | 1508 |
| TC1800001 Cdo1      | NM_03303 "Mus musc RefSeq   | 6.195483 | 5.039861 | 2.227804 | 1509 |
| TC0300002 Adam15    | NM_00961 "Mus musc RefSeq   | 7.688684 | 8.844066 | -2.22743 | 1510 |
| TSUnmapp Egr3       | NM_00128 "early grow RefSeq | 7.869931 | 6.715191 | 2.226442 | 1511 |
| TC0600002 Atoh8     | NM_15377 "Mus musc RefSeq   | 6.706395 | 7.860481 | -2.22543 | 1512 |
| TC1100002 N4bp3     | NM_14597 "Mus musc RefSeq   | 6.175387 | 7.329399 | -2.22532 | 1513 |
| TC0Y00000 Gm21742   | ENSMUST0 cdna:novel ENSEMBL | 6.712704 | 5.560092 | 2.22316  | 1514 |
| TC0100002 Fam124b   | NM_17342 "Mus musc RefSeq   | 4.62269  | 5.774182 | -2.22144 | 1515 |
| TC0900001 Plscr1    | NM_01163 "Mus musc RefSeq   | 5.747345 | 6.898801 | -2.22138 | 1516 |
| TC1200000 Syne2     | NM_00100 "Mus musc RefSeq   | 7.6206   | 8.7713   | -2.22022 | 1517 |
| TC0400002 Bnc2      | NM_17287 "Mus musc RefSeq   | 5.492606 | 4.343922 | 2.217116 | 1518 |
| TC0500002 Gbp10     | NM_00103 "Mus musc RefSeq   | 8.09579  | 9.243785 | -2.21606 | 1519 |
| TC1800000 Isoc1     | NM_02547 "Mus musc RefSeq   | 8.010553 | 6.862993 | 2.215389 | 1520 |
| TC0400002 Gm21104   | XM_00368 "PREDICTEI RefSeq  | 6.551867 | 5.404628 | 2.214896 | 1521 |
| TC1100003 Usp43     | NM_17375 "Mus musc RefSeq   | 4.869444 | 6.016554 | -2.2147  | 1522 |
| TC0100000 Nck2      | NM_01087 "Mus musc RefSeq   | 6.213351 | 7.360272 | -2.21441 | 1523 |
| TC0200000 Mrff      | NM_02642 "Mus musc RefSeq   | 6.685396 | 7.83213  | -2.21412 | 1524 |
| TC1400002 Gm10338   | XM_00147 "PREDICTEI RefSeq  | 4.277037 | 5.423387 | -2.21353 | 1525 |
| TC0600003 Gimap1    | NM_17586 "Mus musc RefSeq   | 6.084218 | 7.229131 | -2.21133 | 1526 |
| TC0400002 Mup1      | NM_03118 "Mus musc RefSeq   | 4.545643 | 3.401546 | 2.210078 | 1527 |
| TC0X00002 Cxx1b     | NM_00101 "Mus musc RefSeq   | 8.662363 | 9.804616 | -2.20726 | 1528 |
| TC0600002 Creb3l2   | NM_17866 "Mus musc RefSeq   | 8.780525 | 7.638365 | 2.207112 | 1529 |
| TC0300000 D3Ertd254 | NM_00110 "Mus musc RefSeq   | 6.457323 | 5.315452 | 2.20667  | 1530 |
| TC0200002 Eya2      | NM_00127 "Mus musc RefSeq   | 5.515134 | 4.373318 | 2.206586 | 1531 |
| TC1000000 Ahi1      | NM_02620 "Mus musc RefSeq   | 5.644892 | 4.50446  | 2.20447  | 1532 |
| TC0800002 Klhl2     | NM_17863 "Mus musc RefSeq   | 5.755192 | 6.895004 | -2.20352 | 1533 |
| TC1200002 Ttc7b     | NM_00103 "Mus musc RefSeq   | 7.496512 | 8.635817 | -2.20275 | 1534 |
| TC0700002 Zfp715    | NM_02726 "Mus musc RefSeq   | 6.282503 | 7.421207 | -2.20183 | 1535 |
| TC0300001 Naaladl2  | XM_97522 "PREDICTEI RefSeq  | 4.321964 | 3.18338  | 2.201648 | 1536 |
| TC0300000 Tbl1xr1   | NM_03073 "Mus musc RefSeq   | 7.020445 | 5.881872 | 2.201631 | 1537 |
| TC1400001 Gm6676    | XM_89104 "PREDICTEI RefSeq  | 3.659801 | 4.796979 | -2.1995  | 1538 |
| TC1400001 Gm16434   | XM_00147 "PREDICTEI RefSeq  | 3.659801 | 4.796979 | -2.1995  | 1538 |
| TC1500002 Rnd1      | NM_17261 "Mus musc RefSeq   | 5.204126 | 6.341184 | -2.19932 | 1540 |
| TC0400003 Phactr4   | NM_17530 "Mus musc RefSeq   | 7.074549 | 8.210757 | -2.19803 | 1541 |
| TC0300003 Pmp2      | NM_00103 "Mus musc RefSeq   | 4.142549 | 5.278655 | -2.19787 | 1542 |
| TC0600000 Smo       | NM_17699 "Mus musc RefSeq   | 8.365202 | 7.229233 | 2.197661 | 1543 |
| TC0600003 Herc6     | NM_02599 "Mus musc RefSeq   | 6.000573 | 7.135513 | -2.19609 | 1544 |
| TC0900002 Pccb      | NM_02583 "Mus musc RefSeq   | 6.907513 | 5.772968 | 2.195493 | 1545 |
| TC1400000 4930555G  | NM_17539 "Mus musc RefSeq   | 3.286694 | 4.420897 | -2.19497 | 1546 |
| TC0800000 Hpgd      | NM_00827 "Mus musc RefSeq   | 5.579693 | 4.445615 | 2.194783 | 1547 |
| TC0300001 Casq2     | NM_00981 "Mus musc RefSeq   | 4.842378 | 5.976335 | -2.1946  | 1548 |
| TC0800000 Acsl1     | NM_00798 "Mus musc RefSeq   | 6.1842   | 7.31776  | -2.194   | 1549 |
| TC1800000 Greb1l    | NM_00108 "Mus musc RefSeq   | 5.116733 | 3.983175 | 2.193992 | 1550 |

|                      |                             |          |          |          |      |
|----------------------|-----------------------------|----------|----------|----------|------|
| TC1100003 Meox1      | NM_01079 "Mus musc RefSeq   | 9.170796 | 8.037945 | 2.192917 | 1551 |
| TC0600001 Tom1       | ENSMUST0 cdna:know ENSEMBL  | 8.361251 | 7.229287 | 2.191569 | 1552 |
| TC1800001 Mcc        | NM_00108 "Mus musc RefSeq   | 8.205627 | 9.337268 | -2.19108 | 1553 |
| TC1300000 Cmah       | NM_00111 "Mus musc RefSeq   | 4.994335 | 3.862958 | 2.190677 | 1554 |
| TC0600002 Plxna4     | NM_17575 "Mus musc RefSeq   | 6.077346 | 7.207878 | -2.1894  | 1555 |
| TC0300001 Dennd2c    | NM_17785 "Mus musc RefSeq   | 4.481266 | 5.611744 | -2.18931 | 1556 |
| TC1100000 Ramp3      | NM_01951 "Mus musc RefSeq   | 5.982512 | 7.112273 | -2.18823 | 1557 |
| TC0900002 Gm684      | NM_00119 "Mus musc RefSeq   | 5.613452 | 4.483953 | 2.187828 | 1558 |
| TC0600000 Mturn      | NM_00128 "maturin, r RefSeq | 7.804153 | 6.674714 | 2.187737 | 1559 |
| TC0200001 Olfr1034   | NM_00101 "Mus musc RefSeq   | 3.796163 | 2.66723  | 2.186969 | 1560 |
| TC1700001 Prkce      | NM_01110 "Mus musc RefSeq   | 5.9588   | 7.086988 | -2.18584 | 1561 |
| TC0900000 Myo1e      | NM_18107 "Mus musc RefSeq   | 7.484465 | 8.61265  | -2.18584 | 1562 |
| TC1100001 Myo18a     | NM_01158 "Mus musc RefSeq   | 6.439057 | 7.566993 | -2.18546 | 1563 |
| TC1500001 Ptk2       | NM_00798 "Mus musc RefSeq   | 7.547124 | 8.6748   | -2.18507 | 1564 |
| TC0500001 Acacb      | NM_13390 "Mus musc RefSeq   | 6.424433 | 7.550462 | -2.18257 | 1565 |
| TC1400001 Gm3460     | XM_00147 "PREDICTEI RefSeq  | 4.214041 | 5.339897 | -2.18231 | 1566 |
| TC0400001 Hspb7      | NM_01386 "Mus musc RefSeq   | 6.630716 | 7.756101 | -2.1816  | 1567 |
| TC0500003 Trip6      | NM_01163 "Mus musc RefSeq   | 6.900574 | 5.7771   | 2.17871  | 1568 |
| TC1900001 Dagla      | NM_19811 "Mus musc RefSeq   | 6.945128 | 5.821954 | 2.178257 | 1569 |
| TC1000000 Ggt5       | NM_01182 "Mus musc RefSeq   | 6.478213 | 5.355583 | 2.177436 | 1570 |
| TC1700000 Pim1       | BC055316 "Mus musc GenBank  | 8.87588  | 7.753301 | 2.177359 | 1571 |
| TC1400001 Usp54      | NM_03018 "Mus musc RefSeq   | 6.946322 | 5.824994 | 2.175471 | 1572 |
| TC0200005 Eng        | NM_00114 "Mus musc RefSeq   | 10.48322 | 11.60357 | -2.174   | 1573 |
| TC0600002 Rbpsuh-rs3 | ENSMUST0 cdna:know ENSEMBL  | 9.261059 | 8.140891 | 2.173723 | 1574 |
| TC1900001 Tjp2       | NM_00119 "Mus musc RefSeq   | 6.90738  | 8.027505 | -2.17366 | 1575 |
| TC0500000 Abcb4      | NM_00883 "Mus musc RefSeq   | 4.168078 | 5.287683 | -2.17288 | 1576 |
| TC0700001 Olfr558    | NM_14709 "Mus musc RefSeq   | 3.881388 | 4.998491 | -2.16911 | 1577 |
| TC1200001 Evl        | NM_00116 "Mus musc RefSeq   | 6.537953 | 7.654998 | -2.16902 | 1578 |
| TC0400002 Lpar1      | NM_17298 "Mus musc RefSeq   | 6.794655 | 5.67894  | 2.167024 | 1579 |
| TC0400002 Gm13305    | NM_00109 "Mus musc RefSeq   | 7.318718 | 6.203215 | 2.166705 | 1581 |
| TC4_JH584 LOC100861  | ENSMUST0 cdna:know ENSEMBL  | 7.318718 | 6.203215 | 2.166705 | 1581 |
| TC4_JH584 LOC100861  | ENSMUST0 cdna:know ENSEMBL  | 7.318718 | 6.203215 | 2.166705 | 1581 |
| TC0700004 Numbl      | NM_01095 "Mus musc RefSeq   | 7.659587 | 6.544135 | 2.166629 | 1583 |
| TC1900000 C030046E1  | NM_00108 "Mus musc RefSeq   | 7.089883 | 8.204711 | -2.16569 | 1584 |
| TC1900000 Pygm       | NM_01122 "Mus musc RefSeq   | 7.052415 | 8.167199 | -2.16563 | 1585 |
| TC0100003 Hsd17b7    | NM_01047 "Mus musc RefSeq   | 6.349437 | 5.234741 | 2.165494 | 1586 |
| TC0900001 S1pr2      | NM_01033 "Mus musc RefSeq   | 7.476228 | 6.362353 | 2.164262 | 1587 |
| TC1100002 Tns3       | NM_00108 "Mus musc RefSeq   | 6.939075 | 5.82621  | 2.162747 | 1588 |
| TC1100002 Slc1a4     | NM_01886 "Mus musc RefSeq   | 5.733804 | 4.62113  | 2.162461 | 1589 |
| TC1500001 Arfgap3    | NM_02544 "Mus musc RefSeq   | 8.35957  | 7.247093 | 2.162166 | 1590 |
| TC0X00001 Magee1     | NM_05320 "Mus musc RefSeq   | 5.858925 | 4.746587 | 2.161957 | 1591 |
| TC0900001 Dusp7      | NM_15345 "Mus musc RefSeq   | 7.713251 | 8.824221 | -2.15991 | 1592 |
| TC0X00000 Nhs12      | NM_00116 "Mus musc RefSeq   | 5.45873  | 6.569554 | -2.15969 | 1593 |
| TC0200001 Cd59a      | NM_00765 "Mus musc RefSeq   | 7.339997 | 8.449287 | -2.15739 | 1594 |
| TC0800002 Exoc3l     | NM_17778 "Mus musc RefSeq   | 6.295562 | 7.404762 | -2.15726 | 1595 |
| TC0100001 Creg1      | NM_01180 "Mus musc RefSeq   | 8.263545 | 7.155209 | 2.155968 | 1596 |
| TC0200004 Creb3l1    | NM_01195 "Mus musc RefSeq   | 8.669718 | 7.561583 | 2.155668 | 1597 |

|                     |                             |          |          |          |      |
|---------------------|-----------------------------|----------|----------|----------|------|
| TC0100003 Srgap2    | NM_00108 "Mus musc RefSeq   | 7.644451 | 8.752531 | -2.15559 | 1598 |
| TC0900001 Ctsh      | NM_00780 "Mus musc RefSeq   | 6.268734 | 5.160779 | 2.155399 | 1599 |
| TC0100003 Darc      | NM_01004 "Mus musc RefSeq   | 4.810792 | 3.70327  | 2.154752 | 1600 |
| TC0200003 Ptges     | NM_02241 "Mus musc RefSeq   | 5.969738 | 4.862373 | 2.154518 | 1601 |
| TC1000001 Ppfia2    | NM_00120 "Mus musc RefSeq   | 4.434027 | 3.327388 | 2.153434 | 1602 |
| TC0700001 Wnt11     | NM_00128 "wingless-r RefSeq | 6.132041 | 5.02575  | 2.152914 | 1603 |
| TC0700001 Inpp5a    | NM_00112 "Mus musc RefSeq   | 7.94751  | 9.052713 | -2.15129 | 1604 |
| TC0700000 Ccdc8     | NM_00110 "Mus musc RefSeq   | 5.347238 | 4.242367 | 2.150796 | 1605 |
| TC1100001 Tmigd1    | NM_02565 "Mus musc RefSeq   | 3.625297 | 4.729214 | -2.14938 | 1606 |
| TC0500000 Evc2      | NM_14592 "Mus musc RefSeq   | 6.594956 | 5.491386 | 2.148858 | 1607 |
| TC0700000 Gng8      | NM_01032 "Mus musc RefSeq   | 5.785114 | 4.68289  | 2.146854 | 1608 |
| TC0X00000 Zfp449    | NM_03013 "Mus musc RefSeq   | 7.16599  | 6.064039 | 2.146448 | 1609 |
| TC0400002 Tbc1d2    | NM_19866 "Mus musc RefSeq   | 5.474089 | 6.575697 | -2.14594 | 1610 |
| TC0X00003 Car5b     | NM_18131 "Mus musc RefSeq   | 5.348974 | 4.247455 | 2.145805 | 1611 |
| TC1800001 Stard4    | NM_13377 "Mus musc RefSeq   | 5.1466   | 6.246384 | -2.14323 | 1612 |
| TC1000002 Shc2      | NM_00102 "Mus musc RefSeq   | 6.509821 | 5.41004  | 2.143222 | 1613 |
| TC1400001 Gm6356    | ENSMUST0 cdna:putat ENSEMBL | 3.356132 | 4.455886 | -2.14318 | 1614 |
| TC0300002 Tm4sf1    | NM_00853 "Mus musc RefSeq   | 8.268605 | 9.368345 | -2.14316 | 1615 |
| TC1300002 Fst       | NM_00804 "Mus musc RefSeq   | 5.451591 | 4.3533   | 2.141009 | 1616 |
| TC1400001 Gm3727    | ENSMUST0 cdna:putat ENSEMBL | 4.07743  | 5.175554 | -2.14076 | 1617 |
| TC0800002 Kifc3     | NM_00114 "Mus musc RefSeq   | 7.03868  | 8.135958 | -2.13951 | 1618 |
| TC1200000 Akap6     | NM_19811 "Mus musc RefSeq   | 4.035256 | 5.132463 | -2.1394  | 1619 |
| TC0200002 Cebpb     | NM_00988 "Mus musc RefSeq   | 7.977111 | 6.880769 | 2.138119 | 1620 |
| TC0500003 Hip1      | NM_14600 "Mus musc RefSeq   | 7.657779 | 8.753394 | -2.13704 | 1621 |
| TC0900003 Abhd14a   | NM_00111 "Mus musc RefSeq   | 6.567952 | 5.472418 | 2.136922 | 1622 |
| TC0700001 Tmem159   | NM_14558 "Mus musc RefSeq   | 8.22273  | 7.12741  | 2.136605 | 1623 |
| TC0300002 Gstm4     | NM_02676 "Mus musc RefSeq   | 6.655886 | 5.561063 | 2.135869 | 1624 |
| TC1500001 Mettl7a1  | NM_02733 "Mus musc RefSeq   | 7.093596 | 5.998996 | 2.135539 | 1625 |
| TC1200001 Ncoa1     | NM_01088 "Mus musc RefSeq   | 8.477384 | 7.383048 | 2.135148 | 1626 |
| TC0100003 Lbr       | NM_13381 "Mus musc RefSeq   | 8.384622 | 9.478333 | -2.13422 | 1627 |
| TC1400001 Gm3594    | XM_00147 "PREDICTEI RefSeq  | 3.26926  | 4.362074 | -2.1329  | 1628 |
| TC0100000 Col4a3    | NM_00773 "Mus musc RefSeq   | 6.334559 | 5.243029 | 2.130999 | 1629 |
| TC1500001 Ghr       | NM_00104 "Mus musc RefSeq   | 7.047577 | 5.956425 | 2.130441 | 1630 |
| TC0X00003 Capn6     | NM_00760 "Mus musc RefSeq   | 4.360125 | 3.269107 | 2.130243 | 1631 |
| TC0500001 Slc24a6   | NM_13322 "Mus musc RefSeq   | 8.342138 | 7.251171 | 2.130168 | 1632 |
| TC0X00002 Atp11c    | NM_00103 "Mus musc RefSeq   | 6.435974 | 7.525422 | -2.12793 | 1633 |
| TC1100001 Git1      | NM_00100 "Mus musc RefSeq   | 8.010554 | 9.097749 | -2.12461 | 1634 |
| TC0600002 Cyp26b1   | NM_17547 "Mus musc RefSeq   | 5.914766 | 7.00083  | -2.12294 | 1635 |
| TC0200000 Pter      | NM_00896 "Mus musc RefSeq   | 6.21571  | 5.129677 | 2.122895 | 1636 |
| TC0600002 Tril      | NM_02581 "Mus musc RefSeq   | 7.902575 | 6.816602 | 2.122807 | 1637 |
| TC0600002 4921507PC | NM_02756 "Mus musc RefSeq   | 3.784652 | 4.870101 | -2.12204 | 1638 |
| TC0100003 Chpf      | NM_00100 "Mus musc RefSeq   | 7.074135 | 5.988832 | 2.121821 | 1639 |
| TC1000000 Slc16a9   | NM_02580 "Mus musc RefSeq   | 5.975616 | 4.891322 | 2.120338 | 1640 |
| TC0100002 Inhbb     | NM_00838 "Mus musc RefSeq   | 7.153786 | 6.070048 | 2.119521 | 1641 |
| TC1000001 E2f7      | NM_17860 "Mus musc RefSeq   | 5.188452 | 6.272128 | -2.11943 | 1642 |
| TC0200000 Usp6nl    | NM_00108 "Mus musc RefSeq   | 6.380011 | 7.46343  | -2.11905 | 1643 |
| TC0600003 Clec12b   | NM_02770 "Mus musc RefSeq   | 3.855669 | 4.939029 | -2.11897 | 1644 |

|                     |                            |          |          |          |      |
|---------------------|----------------------------|----------|----------|----------|------|
| TC0600001 Efcc1     | NM_00115 "Mus musc RefSeq  | 6.35146  | 5.269958 | 2.116238 | 1645 |
| TC0400001 Tal1      | NM_01152 "Mus musc RefSeq  | 5.439274 | 6.520126 | -2.11529 | 1646 |
| TC0300002 Golim4    | NM_17519 "Mus musc RefSeq  | 8.167553 | 7.086799 | 2.115141 | 1647 |
| TC0200005 4930402H2 | NM_02943 "Mus musc RefSeq  | 7.102162 | 8.182419 | -2.11441 | 1648 |
| TC1100003 Tmem97    | NM_13370 "Mus musc RefSeq  | 6.854116 | 5.773943 | 2.11429  | 1649 |
| TC0900000 Uaca      | NM_02828 "Mus musc RefSeq  | 7.713467 | 8.793513 | -2.1141  | 1650 |
| TC0100003 Nr5a2     | NM_00115 "Mus musc RefSeq  | 4.309586 | 5.389395 | -2.11376 | 1651 |
| TC0400002 Fam219a   | NM_00115 "Mus musc RefSeq  | 6.635143 | 7.714031 | -2.11241 | 1652 |
| TC0800001 Sntb2     | NM_00922 "Mus musc RefSeq  | 8.981823 | 7.903396 | 2.111732 | 1653 |
| TC1100003 Tnfaip1   | NM_00939 "Mus musc RefSeq  | 8.275787 | 9.352426 | -2.10912 | 1654 |
| TC1700000 Tnfaip8l1 | NM_02556 "Mus musc RefSeq  | 4.672668 | 5.748775 | -2.10834 | 1655 |
| TC0100000 Crisp1d1  | NM_03140 "Mus musc RefSeq  | 4.925363 | 6.000238 | -2.10654 | 1656 |
| TC0300000 Prkab2    | NM_18299 "Mus musc RefSeq  | 6.75207  | 5.677403 | 2.106236 | 1657 |
| TC0500000 Abcb1b    | NM_01107 "Mus musc RefSeq  | 6.278296 | 7.35147  | -2.10406 | 1658 |
| TC0100002 Kif1a     | NM_00111 "Mus musc RefSeq  | 6.119845 | 5.048279 | 2.101713 | 1659 |
| TC1700000 Psmb8     | NM_01072 "Mus musc RefSeq  | 6.114605 | 7.185654 | -2.10096 | 1660 |
| TC0800001 Foxc2     | NM_01351 "Mus musc RefSeq  | 5.560949 | 4.489923 | 2.100927 | 1661 |
| TC1900000 Hectd2    | NM_17263 "Mus musc RefSeq  | 4.704205 | 3.634469 | 2.099049 | 1662 |
| TC0500002 Adamts3   | NM_17787 "Mus musc RefSeq  | 4.774342 | 3.70497  | 2.09852  | 1663 |
| TC0100000 Rab23     | NM_00899 "Mus musc RefSeq  | 6.222197 | 5.155693 | 2.094352 | 1664 |
| TC1000002 Mmp11     | NM_00860 "Mus musc RefSeq  | 7.089596 | 6.023277 | 2.094084 | 1665 |
| TC1000000 Gja1      | NM_01028 "Mus musc RefSeq  | 5.241869 | 6.308059 | -2.0939  | 1666 |
| TC0600003 Sox5      | NM_01144 "Mus musc RefSeq  | 5.391149 | 4.32547  | 2.093155 | 1667 |
| TC1100002 Rasd1     | NM_00902 "Mus musc RefSeq  | 6.301461 | 7.365833 | -2.09126 | 1668 |
| TC1500000 Phf20l1   | NM_00108 "Mus musc RefSeq  | 6.933031 | 7.997342 | -2.09117 | 1669 |
| TC0500002 Scarb2    | NM_00764 "Mus musc RefSeq  | 9.155447 | 8.091192 | 2.09109  | 1670 |
| TC0400002 Gba2      | NM_17269 "Mus musc RefSeq  | 6.64354  | 7.707647 | -2.09088 | 1671 |
| TC0900000 Rpp25     | NM_13398 "Mus musc RefSeq  | 5.012283 | 3.948497 | 2.09041  | 1672 |
| TC1400000 Stmn4     | NM_01967 "Mus musc RefSeq  | 5.775055 | 4.711383 | 2.090245 | 1673 |
| TC0800001 Nlrc5     | NM_00103 "Mus musc RefSeq  | 5.165478 | 6.228042 | -2.08864 | 1674 |
| TC1000001 Ppm1h     | NM_17691 "Mus musc RefSeq  | 5.426846 | 6.489225 | -2.08837 | 1675 |
| TC0700003 Trim30d   | NM_00116 "Mus musc RefSeq  | 5.000353 | 6.061938 | -2.08722 | 1676 |
| TC0700000 Rhpn2     | NM_02789 "Mus musc RefSeq  | 5.411726 | 6.473295 | -2.0872  | 1677 |
| TC0800002 Bst2      | NM_19809 "Mus musc RefSeq  | 7.748395 | 8.809635 | -2.08672 | 1678 |
| TC1400000 Arhgef3   | NM_00128 "Rho guani RefSeq | 7.0796   | 8.140525 | -2.08627 | 1679 |
| TC0500003 Sh2b3     | NM_00850 "Mus musc RefSeq  | 7.084046 | 8.143286 | -2.08383 | 1680 |
| TC0600000 Calu      | NM_00759 "Mus musc RefSeq  | 9.60749  | 8.5494   | 2.082173 | 1681 |
| TC0700004 Cdkn1c    | NM_00987 "Mus musc RefSeq  | 7.620828 | 8.67862  | -2.08174 | 1682 |
| TC1400001 Gm21103   | XM_00368 "PREDICTEI RefSeq | 4.588197 | 5.645607 | -2.08119 | 1683 |
| TC0300003 Lmo4      | NM_00116 "Mus musc RefSeq  | 7.063993 | 6.006856 | 2.080798 | 1684 |
| TC0700001 Gab2      | NM_00116 "Mus musc RefSeq  | 9.366676 | 8.309628 | 2.08067  | 1685 |
| TC0100003 Rgl1      | NM_01684 "Mus musc RefSeq  | 7.757121 | 8.814103 | -2.08058 | 1686 |
| TC1900000 Rab3il1   | NM_14453 "Mus musc RefSeq  | 6.612683 | 5.555992 | 2.080155 | 1687 |
| TC0700003 Crtc3     | NM_17386 "Mus musc RefSeq  | 8.115427 | 7.05877  | 2.080106 | 1688 |
| TC1500001 St3gal1   | NM_00917 "Mus musc RefSeq  | 7.06132  | 8.117292 | -2.07912 | 1689 |
| TC1400000 Ktn1      | NM_00847 "Mus musc RefSeq  | 6.790671 | 7.846446 | -2.07884 | 1690 |
| TC1800000 Asxl3     | NM_00116 "Mus musc RefSeq  | 4.506184 | 5.561554 | -2.07825 | 1691 |

|                    |                                |          |          |          |      |
|--------------------|--------------------------------|----------|----------|----------|------|
| TC090000C Hexa     | NM_01042 "Mus musc RefSeq      | 8.479597 | 7.424356 | 2.078065 | 1692 |
| TC0700001 Swap70   | NM_00930 "Mus musc RefSeq      | 6.64426  | 7.699405 | -2.07793 | 1693 |
| TC120000C Itsn2    | NM_00119 "Mus musc RefSeq      | 7.261337 | 8.316464 | -2.0779  | 1694 |
| TC0500002 Cnot6l   | NM_00128 "CCR4-NOT RefSeq      | 7.097769 | 8.152872 | -2.07787 | 1695 |
| TC140000C Gm3047   | XM_00147 "PREDICTEI RefSeq     | 4.177483 | 5.23249  | -2.07773 | 1696 |
| TC170000C Tap1     | NM_00116 "Mus musc RefSeq      | 6.94652  | 8.001261 | -2.07735 | 1697 |
| TC1000002 Nr1h4    | NM_00116 "Mus musc RefSeq      | 4.60807  | 3.553369 | 2.077288 | 1698 |
| TC1000003 Gli1     | NM_01029 "Mus musc RefSeq      | 6.136025 | 5.082287 | 2.075902 | 1699 |
| TC0100002 Pid1     | NM_00100 "Mus musc RefSeq      | 5.960426 | 4.907495 | 2.074741 | 1700 |
| TC0700004 Bnip3    | NM_00976 "Mus musc RefSeq      | 5.976846 | 7.029181 | -2.07388 | 1701 |
| TC0100003 BC034090 | XM_14897 "PREDICTEI RefSeq     | 6.089226 | 5.037182 | 2.073465 | 1702 |
| TC0200004 Acss1    | NM_08057 "Mus musc RefSeq      | 5.210782 | 6.262445 | -2.07292 | 1703 |
| TC0900002 Rab11a   | NM_01738 "Mus musc RefSeq      | 6.573387 | 7.624509 | -2.07214 | 1704 |
| TC190000C Gstp2    | NM_18179 "Mus musc RefSeq      | 8.436723 | 7.38579  | 2.071869 | 1705 |
| TC1300001 Dtnbp1   | NM_02577 "Mus musc RefSeq      | 7.774178 | 6.724443 | 2.07015  | 1706 |
| TC120000C Sypl     | NM_01363 "Mus musc RefSeq      | 5.894206 | 6.943797 | -2.06994 | 1707 |
| TC1000002 Gopc     | NM_05318 "Mus musc RefSeq      | 6.134672 | 7.184239 | -2.06991 | 1708 |
| TC120000C Flrt2    | NM_20151 "Mus musc RefSeq      | 6.555173 | 5.506181 | 2.069084 | 1709 |
| TC170000C Cyp39a1  | NM_00128 "cytochron RefSeq     | 6.954629 | 5.90597  | 2.068606 | 1710 |
| TC0500001 Gatsl2   | NM_03071 "Mus musc RefSeq      | 6.726394 | 5.679116 | 2.066627 | 1711 |
| TC0300001 Extl2    | NM_02138 "Mus musc RefSeq      | 6.386264 | 5.339565 | 2.065798 | 1712 |
| TC0400001 Stmn1    | NM_01964 "Mus musc RefSeq      | 5.224829 | 6.271167 | -2.06528 | 1713 |
| TC1000002 S1pr4    | NM_01010 "Mus musc RefSeq      | 4.239065 | 5.285379 | -2.06525 | 1714 |
| TC0200002 Tcf15    | NM_00932 "Mus musc RefSeq      | 8.587401 | 9.63304  | -2.06428 | 1715 |
| TC0100003 Ppp2r5a  | NM_14488 "Mus musc RefSeq      | 8.618479 | 9.663841 | -2.06388 | 1716 |
| TC1700002 Gm10495  | XM_00308 "PREDICTEI MGI/Jacksc | 7.465958 | 6.420605 | 2.063871 | 1717 |
| TC0200004 Meis2    | NM_00115 "Mus musc RefSeq      | 5.957646 | 4.913526 | 2.062108 | 1718 |
| TC0700004 Cpxm2    | NM_01886 "Mus musc RefSeq      | 5.549704 | 4.506263 | 2.061138 | 1719 |
| TC0100003 Shisa4   | NM_17525 "Mus musc RefSeq      | 5.949758 | 4.906454 | 2.060942 | 1720 |
| TSUnmapp Ddit3     | NM_00129 "DNA-dam: RefSeq      | 8.493016 | 7.450043 | 2.060469 | 1721 |
| TC0200001 Lgr4     | NM_17267 "Mus musc RefSeq      | 5.778538 | 4.736264 | 2.059471 | 1722 |
| TC090000C Mmp27    | NM_00103 "Mus musc RefSeq      | 4.29938  | 3.257379 | 2.059082 | 1723 |
| TC0700003 Fah      | NM_01017 "Mus musc RefSeq      | 6.806621 | 5.764627 | 2.059072 | 1724 |
| TC0X00001 Scml2    | NM_13319 "Mus musc RefSeq      | 4.757511 | 3.717693 | 2.055968 | 1725 |
| TC0X00003 Armcx2   | NM_00116 "Mus musc RefSeq      | 6.744235 | 5.70444  | 2.055935 | 1726 |
| TC0900002 Polr2m   | NM_00116 "Mus musc RefSeq      | 6.270968 | 7.309691 | -2.05441 | 1727 |
| TC0700004 Rnh1     | NM_00117 "Mus musc RefSeq      | 8.01531  | 6.977552 | 2.053035 | 1728 |
| TC0900002 AW551984 | NM_00119 "Mus musc RefSeq      | 4.768387 | 3.731239 | 2.052167 | 1729 |
| TC1700001 Tead3    | NM_00109 "Mus musc RefSeq      | 6.518764 | 5.482759 | 2.050542 | 1730 |
| TC120000C Cmpk2    | NM_02055 "Mus musc RefSeq      | 7.305454 | 8.341057 | -2.04997 | 1731 |
| TC0300002 Synpo2   | NM_08045 "Mus musc RefSeq      | 5.590651 | 4.555535 | 2.049278 | 1732 |
| TC0200003 Arhgap21 | NM_00108 "Mus musc RefSeq      | 8.52399  | 7.488936 | 2.04919  | 1733 |
| TC0900002 C2cd2l   | NM_02790 "Mus musc RefSeq      | 6.526864 | 7.5619   | -2.04917 | 1734 |
| TC1400001 Gm5458   | NM_00102 "Mus musc RefSeq      | 4.201929 | 5.236316 | -2.04824 | 1735 |
| TC110000C Gm2a     | NM_01029 "Mus musc RefSeq      | 8.831959 | 7.797868 | 2.047823 | 1736 |
| TC1400002 Psme2    | NM_01119 "Mus musc RefSeq      | 6.401226 | 7.434889 | -2.04722 | 1737 |
| TC0100001 Phlpp1   | NM_13382 "Mus musc RefSeq      | 7.341207 | 8.374756 | -2.04705 | 1738 |

|                     |                            |          |          |          |      |
|---------------------|----------------------------|----------|----------|----------|------|
| TC1000002 Pdxk      | NM_17213 "Mus musc RefSeq  | 7.074203 | 6.040719 | 2.046962 | 1739 |
| TC0700000 Mtmr10    | NM_17274 "Mus musc RefSeq  | 7.252339 | 8.285545 | -2.04657 | 1740 |
| TC1100000 Wnt9a     | NM_13929 "Mus musc RefSeq  | 7.038352 | 6.005179 | 2.04652  | 1741 |
| TC0500003 Ift81     | NM_00987 "Mus musc RefSeq  | 5.183239 | 4.150082 | 2.046498 | 1742 |
| TC0100000 Adam23    | NM_00117 "Mus musc RefSeq  | 4.973405 | 6.006258 | -2.04607 | 1743 |
| TC0400002 B4galt1   | NM_02230 "Mus musc RefSeq  | 9.270369 | 8.237523 | 2.046057 | 1744 |
| TC0X00000 Atp6ap2   | NM_02743 "Mus musc RefSeq  | 8.343122 | 7.31168  | 2.044066 | 1745 |
| TC1000002 Acss3     | NM_00114 "Mus musc RefSeq  | 4.449963 | 3.418589 | 2.04397  | 1746 |
| TC1600000 Scarf2    | NM_15379 "Mus musc RefSeq  | 7.400606 | 6.370385 | 2.042337 | 1747 |
| TC0700004 Gga2      | NM_02875 "Mus musc RefSeq  | 6.230892 | 5.201538 | 2.04111  | 1748 |
| TC0800003 Znrf1     | NM_00116 "Mus musc RefSeq  | 6.138362 | 7.167684 | -2.04107 | 1749 |
| TC0400000 Gm20938   | XM_00148 "PREDICTEI RefSeq | 4.876326 | 3.847079 | 2.040959 | 1750 |
| TC0400002 Gm12429   | NM_00127 "Mus musc RefSeq  | 4.544668 | 3.515421 | 2.040959 | 1750 |
| TC0X00002 F8        | NM_00797 "Mus musc RefSeq  | 3.329671 | 4.358363 | -2.04017 | 1752 |
| TC0900000 Thy1      | NM_00938 "Mus musc RefSeq  | 7.039593 | 6.011624 | 2.039152 | 1753 |
| TC1400000 Gm3127    | XM_00147 "PREDICTEI RefSeq | 2.996508 | 4.024347 | -2.03897 | 1754 |
| TC0900002 St3gal4   | NM_00917 "Mus musc RefSeq  | 7.896112 | 6.86871  | 2.03835  | 1755 |
| TC1100002 Rnf213    | XM_00147 "PREDICTEI RefSeq | 8.331505 | 9.358506 | -2.03778 | 1756 |
| TC0900002 Nck1      | NM_01087 "Mus musc RefSeq  | 6.696242 | 7.722058 | -2.03611 | 1757 |
| TC0X00002 Zcchc5    | NM_19946 "Mus musc RefSeq  | 5.756805 | 4.731523 | 2.035357 | 1758 |
| TC1300000 Gm2399    | ENSMUST0 cdna:know ENSEMBL | 11.85571 | 10.8305  | 2.035265 | 1759 |
| TC1800000 Sh3tc2    | NM_17262 "Mus musc RefSeq  | 5.511395 | 6.53659  | -2.03523 | 1760 |
| TC1400001 Gm3453    | XM_00147 "PREDICTEI RefSeq | 3.158676 | 4.182899 | -2.03386 | 1761 |
| TC0900001 Myrip     | NM_14455 "Mus musc RefSeq  | 6.855976 | 5.832421 | 2.032922 | 1762 |
| TC0500001 Tpst2     | NM_00941 "Mus musc RefSeq  | 6.97041  | 7.993832 | -2.03274 | 1763 |
| TC0300001 Bcar3     | NM_01386 "Mus musc RefSeq  | 5.811418 | 6.834578 | -2.03237 | 1764 |
| TC0700001 Prcp      | NM_02824 "Mus musc RefSeq  | 7.281807 | 8.303874 | -2.03083 | 1765 |
| TC0600000 Tmem150a  | NM_14491 "Mus musc RefSeq  | 7.62244  | 6.600388 | 2.030805 | 1766 |
| TC0400003 Themis2   | NM_00103 "Mus musc RefSeq  | 5.010483 | 6.031977 | -2.03002 | 1767 |
| TC1100003 Acsf2     | NM_15380 "Mus musc RefSeq  | 6.468034 | 7.489325 | -2.02973 | 1768 |
| TC0200000 Abca2     | NM_00737 "Mus musc RefSeq  | 6.985242 | 5.96438  | 2.029131 | 1769 |
| TC0200004 Prrg4     | NM_17869 "Mus musc RefSeq  | 4.980994 | 6.001856 | -2.02913 | 1769 |
| TC0100001 Cyb5r1    | NM_02805 "Mus musc RefSeq  | 6.519815 | 7.53974  | -2.02781 | 1771 |
| TC1100003 Krt222    | NM_17294 "Mus musc RefSeq  | 4.085369 | 5.104961 | -2.02735 | 1772 |
| TC1600000 Rtp4      | NM_02338 "Mus musc RefSeq  | 5.547175 | 6.566199 | -2.02655 | 1773 |
| TC0900002 Snx33     | NM_17548 "Mus musc RefSeq  | 7.51103  | 6.492116 | 2.026393 | 1774 |
| TC1_GL456 AC125149. | ENSMUST0 cdna:know ENSEMBL | 6.950214 | 5.93185  | 2.025621 | 1775 |
| TC0100000 Rdh10     | NM_13383 "Mus musc RefSeq  | 7.103802 | 6.085724 | 2.025219 | 1776 |
| TC1400000 Gm3187    | ENSMUST0 cdna:know ENSEMBL | 4.277374 | 5.294687 | -2.02415 | 1777 |
| TC0700002 Ehd2      | NM_15306 "Mus musc RefSeq  | 9.502195 | 10.51922 | -2.02374 | 1778 |
| TC0700003 Fes       | NM_01019 "Mus musc RefSeq  | 6.642705 | 7.659548 | -2.02349 | 1779 |
| TC0100003 Atp1b1    | NM_00972 "Mus musc RefSeq  | 5.477176 | 4.460432 | 2.023347 | 1780 |
| TC0300000 Gpr160    | NM_00113 "Mus musc RefSeq  | 4.811287 | 5.827279 | -2.02229 | 1781 |
| TC0500000 Tbc1d1    | NM_01963 "Mus musc RefSeq  | 6.052938 | 7.068873 | -2.02221 | 1782 |
| TC0900001 Myo6      | NM_00103 "Mus musc RefSeq  | 6.933958 | 7.949608 | -2.02181 | 1783 |
| TC0700000 Cebpa     | NM_00128 "CCAAT/en RefSeq  | 6.696355 | 5.681594 | 2.020568 | 1784 |
| TC0100000 150001501 | NM_02428 "Mus musc RefSeq  | 5.071549 | 4.057018 | 2.020246 | 1785 |

|                     |                            |          |          |          |      |
|---------------------|----------------------------|----------|----------|----------|------|
| TC0800001 Ces2g     | NM_19799 "Mus musc RefSeq  | 6.112673 | 5.098272 | 2.020064 | 1786 |
| TC1900001 Plgrkt    | NM_02636 "Mus musc RefSeq  | 6.581495 | 7.594861 | -2.01862 | 1787 |
| TC1300001 Atxn1     | NM_00912 "Mus musc RefSeq  | 6.895549 | 7.908103 | -2.01748 | 1788 |
| TC1100000 Spred2    | NM_03352 "Mus musc RefSeq  | 7.545492 | 8.557294 | -2.01643 | 1789 |
| TC1900001 Ostf1     | NM_01737 "Mus musc RefSeq  | 6.858213 | 7.868991 | -2.015   | 1790 |
| TC0800001 Adam5     | NM_00127 "Mus musc RefSeq  | 4.259878 | 3.249255 | 2.014781 | 1791 |
| TC1800000 Ccny      | NM_02648 "Mus musc RefSeq  | 7.703239 | 8.713832 | -2.01474 | 1792 |
| TC1300000 Cd83      | NM_00985 "Mus musc RefSeq  | 6.549443 | 5.538932 | 2.014625 | 1793 |
| TC1900000 Ifit1     | NM_00833 "Mus musc RefSeq  | 6.369125 | 7.378838 | -2.01351 | 1794 |
| TC0X00002 Gla       | NM_01346 "Mus musc RefSeq  | 6.41407  | 5.404486 | 2.01333  | 1795 |
| TC0700004 Cox6a2    | NM_00994 "Mus musc RefSeq  | 6.442216 | 7.450894 | -2.01207 | 1796 |
| TC0200003 Uap1l1    | NM_00103 "Mus musc RefSeq  | 6.661127 | 5.652673 | 2.011754 | 1797 |
| TC0400001 Dhrrs3    | NM_00117 "Mus musc RefSeq  | 8.605393 | 9.613518 | -2.0113  | 1798 |
| TC1200001 Sec23a    | NM_00914 "Mus musc RefSeq  | 7.89993  | 6.891824 | 2.011269 | 1799 |
| TC1200001 Hhip1     | ENSMUST0 cdna:know ENSEMBL | 6.053364 | 5.045535 | 2.010883 | 1800 |
| TC1400000 Gm10413   | NM_02928 "Mus musc RefSeq  | 4.23376  | 5.240903 | -2.00993 | 1801 |
| TC0400003 Sepn1     | NM_02910 "Mus musc RefSeq  | 8.267408 | 7.260551 | 2.009528 | 1802 |
| TC1000000 Sgk1      | NM_00116 "Mus musc RefSeq  | 8.111343 | 9.11799  | -2.00924 | 1803 |
| TC0400001 Lepre1    | NM_01978 "Mus musc RefSeq  | 6.774413 | 5.768509 | 2.008201 | 1804 |
| TC0100000 Atic      | NM_02619 "Mus musc RefSeq  | 6.466695 | 5.460892 | 2.008061 | 1805 |
| TC0400000 Tgfbr1    | NM_00937 "Mus musc RefSeq  | 7.757529 | 6.752258 | 2.007321 | 1806 |
| TC0700001 Acadsb    | NM_02582 "Mus musc RefSeq  | 7.645353 | 6.640441 | 2.006821 | 1807 |
| TC1900001 Aldh1a7   | NM_01192 "Mus musc RefSeq  | 4.856721 | 3.851982 | 2.00658  | 1808 |
| TC0800003 Cbfa2t3   | NM_17728 "Mus musc RefSeq  | 6.975185 | 7.979395 | -2.00585 | 1809 |
| TC0X00003 Tspyl2    | NM_02983 "Mus musc RefSeq  | 7.550243 | 6.546653 | 2.004983 | 1810 |
| TC0700003 Tsku      | NM_00116 "Mus musc RefSeq  | 5.893929 | 4.890955 | 2.004127 | 1811 |
| TC1100002 Kremen1   | NM_03239 "Mus musc RefSeq  | 7.350108 | 6.347221 | 2.004006 | 1812 |
| TC1400000 Flnb      | NM_13408 "Mus musc RefSeq  | 8.490359 | 9.492889 | -2.00351 | 1813 |
| TC1900000 Add3      | NM_00116 "Mus musc RefSeq  | 8.898536 | 7.896277 | 2.003134 | 1814 |
| TC0500001 Cldn15    | NM_02171 "Mus musc RefSeq  | 5.563041 | 6.565296 | -2.00313 | 1815 |
| TC1000001 Syne1     | NM_02202 "Mus musc RefSeq  | 7.813306 | 8.81537  | -2.00286 | 1816 |
| TC1700001 Tnf       | NM_01369 "Mus musc RefSeq  | 5.550351 | 6.552236 | -2.00262 | 1817 |
| TC1_GL456 AC125149. | ENSMUST0 cdna:know ENSEMBL | 6.745165 | 5.74446  | 2.000978 | 1818 |

[illegible]



[illegible]







|      |        |
|------|--------|
| up   | coding |
| down | coding |
| up   | coding |
| down | coding |
| up   | coding |
| up   | coding |
| down | coding |
| up   | coding |
| down | coding |
| down | coding |
| up   | coding |
| up   | coding |
| down | coding |
| up   | coding |
| down | coding |
| down | coding |
| up   | coding |
| down | coding |
| up   | coding |
| down | coding |
| up   | coding |
| up   | coding |

|      |        |
|------|--------|
| up   | coding |
| up   | coding |
| down | coding |
| up   | coding |
| up   | coding |
| up   | coding |
| down | coding |
| up   | coding |
| down | coding |
| up   | coding |
| down | coding |
| down | coding |
| up   | coding |
| up   | coding |
| up   | coding |
| down | coding |
| down | coding |
| down | coding |
| up   | coding |
| up   | coding |
| up   | coding |
| down | coding |
| up   | coding |
| down | coding |
| up   | coding |
| up   | coding |
| down | coding |
| up   | coding |
| down | coding |
| down | coding |
| up   | coding |

|      |        |
|------|--------|
| up   | coding |
| up   | coding |
| up   | coding |
| down | coding |
| up   | coding |
| up   | coding |
| down | coding |
| down | coding |
| up   | coding |
| up   | coding |
| down | coding |
| up   | coding |
| up   | coding |
| up   | coding |
| down | coding |
| up   | coding |
| down | coding |
| up   | coding |
| up   | coding |
| down | coding |
| down | coding |
| up   | coding |
| down | coding |
| up   | coding |
| up   | coding |
| down | coding |
| down | coding |
| down | coding |
| up   | coding |

|      |        |
|------|--------|
| down | coding |
| up   | coding |
| up   | coding |
| up   | coding |
| down | coding |
| down | coding |
| down | coding |
| up   | coding |
| down | coding |
| down | coding |
| down | coding |
| up   | coding |
| up   | coding |
| down | coding |
| up   | coding |
| up   | coding |
| down | coding |
| down | coding |
| down | coding |
| up   | coding |
| up   | coding |
| down | coding |
| down | coding |
| up   | coding |
| down | coding |
| up   | coding |
| down | coding |
| up   | coding |
| down | coding |
| up   | coding |



|      |        |
|------|--------|
| down | coding |
| up   | coding |
| up   | coding |
| down | coding |
| up   | coding |
| down | coding |
| up   | coding |
| down | coding |
| down | coding |
| up   | coding |
| up   | coding |
| up   | coding |
| down | coding |
| up   | coding |
| up   | coding |
| up   | coding |
| down | coding |
| down | coding |
| up   | coding |
| down | coding |
| down | coding |
| up   | coding |
| down | coding |
| up   | coding |
| down | coding |
| up   | coding |
| down | coding |
| down | coding |
| down | coding |
| up   | coding |

|      |        |
|------|--------|
| down | coding |
| up   | coding |
| down | coding |
| up   | coding |
| down | coding |
| up   | coding |
| down | coding |
| down | coding |
| down | coding |
| up   | coding |
| up   | coding |
| down | coding |
| down | coding |
| up   | coding |
| down | coding |
| up   | coding |
| down | coding |
| down | coding |
| up   | coding |
| up   | coding |
| down | coding |
| down | coding |
| up   | coding |
| up   | coding |
| down | coding |
| down | coding |
| up   | coding |
| up   | coding |
| down | coding |
| down | coding |
| up   | coding |
| down | coding |
| up   | coding |



|      |        |
|------|--------|
| down | coding |
| up   | coding |
| down | coding |
| down | coding |
| down | coding |
| up   | coding |
| down | coding |
| up   | coding |
| down | coding |
| up   | coding |
| down | coding |
| down | coding |
| down | coding |
| up   | coding |
| down | coding |
| up   | coding |
| down | coding |
| up   | coding |
| down | coding |
| up   | coding |
| down | coding |
| down | coding |
| down | coding |
| up   | coding |
| down | coding |

|      |        |
|------|--------|
| down | coding |
| up   | coding |
| up   | coding |
| down | coding |
| down | coding |
| up   | coding |
| down | coding |
| down | coding |
| down | coding |
| up   | coding |
| down | coding |
| up   | coding |
| up   | coding |
| down | coding |
| up   | coding |
| up   | coding |
| down | coding |
| up   | coding |
| up   | coding |
| down | coding |
| up   | coding |
| down | coding |
| down | coding |
| up   | coding |
| up   | coding |
| down | coding |
| up   | coding |
| up   | coding |
| down | coding |
| up   | coding |
| down | coding |
| down | coding |
| down | coding |

|      |        |
|------|--------|
| up   | coding |
| down | coding |
| up   | coding |
| down | coding |
| down | coding |
| down | coding |
| up   | coding |
| up   | coding |
| down | coding |
| up   | coding |
| down | coding |
| up   | coding |
| up   | coding |
| up   | coding |
| down | coding |
| up   | coding |
| down | coding |
| down | coding |
| up   | coding |
| down | coding |
| up   | coding |
| up   | coding |
| up   | coding |
| down | coding |
| up   | coding |
| up   | coding |
| down | coding |
| up   | coding |
| up   | coding |
| down | coding |
| up   | coding |
| up   | coding |
| down | coding |
| down | coding |
| up   | coding |
| down | coding |

|      |        |
|------|--------|
| down | coding |
| up   | coding |
| down | coding |
| down | coding |
| up   | coding |
| down | coding |
| down | coding |
| up   | coding |
| down | coding |
| down | coding |
| up   | coding |
| down | coding |
| up   | coding |
| up   | coding |
| down | coding |
| up   | coding |
| down | coding |
| up   | coding |
| down | coding |
| down | coding |
| up   | coding |
| down | coding |
| down | coding |
| down | coding |
| up   | coding |
| down | coding |
| down | coding |
| down | coding |
| up   | coding |

|      |        |
|------|--------|
| down | coding |
| down | coding |
| up   | coding |
| down | coding |
| up   | coding |
| down | coding |
| up   | coding |
| down | coding |
| down | coding |
| up   | coding |
| up   | coding |
| down | coding |
| up   | coding |
| down | coding |
| down | coding |
| up   | coding |
| down | coding |
| down | coding |
| down | coding |
| up   | coding |
| down | coding |
| down | coding |
| up   | coding |
| down | coding |
| down | coding |
| up   | coding |
| down | coding |
| up   | coding |
| down | coding |
| down | coding |
| up   | coding |



|      |        |
|------|--------|
| down | coding |
| up   | coding |
| up   | coding |
| up   | coding |
| down | coding |
| up   | coding |
| down | coding |
| up   | coding |
| up   | coding |
| down | coding |
| up   | coding |
| down | coding |
| up   | coding |
| up   | coding |
| down | coding |
| up   | coding |
| up   | coding |
| down | coding |
| up   | coding |
| up   | coding |
| down | coding |
| up   | coding |
| up   | coding |
| down | coding |
| down | coding |
| up   | coding |
| up   | coding |
| up   | coding |

|      |        |
|------|--------|
| up   | coding |
| up   | coding |
| up   | coding |
| down | coding |
| down | coding |
| up   | coding |
| down | coding |
| up   | coding |
| up   | coding |
| up   | coding |
| down | coding |
| up   | coding |
| up   | coding |
| up   | coding |
| down | coding |
| up   | coding |
| up   | coding |
| up   | coding |
| down | coding |
| up   | coding |
| down | coding |
| up   | coding |
| down | coding |
| down | coding |
| down | coding |
| up   | coding |
| down | coding |
| up   | coding |
| down | coding |
| up   | coding |
| down | coding |

|      |        |
|------|--------|
| down | coding |
| up   | coding |
| up   | coding |
| down | coding |
| up   | coding |
| up   | coding |
| down | coding |
| down | coding |
| up   | coding |
| down | coding |
| down | coding |
| up   | coding |
| down | coding |
| up   | coding |
| down | coding |
| up   | coding |
| down | coding |
| up   | coding |
| down | coding |
| up   | coding |
| down | coding |
| up   | coding |

|      |        |
|------|--------|
| down | coding |
| up   | coding |
| up   | coding |
| down | coding |
| up   | coding |
| down | coding |
| up   | coding |
| down | coding |
| up   | coding |
| down | coding |
| up   | coding |
| up   | coding |
| up   | coding |
| down | coding |
| up   | coding |
| down | coding |
| down | coding |
| up   | coding |
| up   | coding |
| down | coding |
| up   | coding |
| down | coding |
| up   | coding |
| down | coding |
| down | coding |
| down | coding |
| up   | coding |
| up   | coding |

|      |        |
|------|--------|
| down | coding |
| down | coding |
| down | coding |
| up   | coding |
| up   | coding |
| down | coding |
| up   | coding |
| down | coding |
| up   | coding |
| up   | coding |
| down | coding |
| down | coding |
| up   | coding |
| down | coding |
| up   | coding |
| down | coding |
| up   | coding |
| down | coding |
| up   | coding |
| down | coding |
| up   | coding |
| down | coding |
| up   | coding |
| down | coding |
| down | coding |

|      |        |
|------|--------|
| up   | coding |
| down | coding |
| up   | coding |
| up   | coding |
| down | coding |
| down | coding |
| up   | coding |
| down | coding |
| down | coding |
| up   | coding |
| down | coding |
| down | coding |
| up   | coding |
| up   | coding |
| down | coding |
| down | coding |
| up   | coding |
| down | coding |
| up   | coding |
| down | coding |
| up   | coding |
| down | coding |
| up   | coding |
| down | coding |
| up   | coding |
| up   | coding |
| down | coding |
| up   | coding |
| down | coding |
| up   | coding |
| down | coding |
| down | coding |

|      |        |
|------|--------|
| up   | coding |
| down | coding |
| up   | coding |
| up   | coding |
| down | coding |
| up   | coding |
| down | coding |
| down | coding |
| up   | coding |
| down | coding |
| down | coding |
| up   | coding |
| down | coding |
| up   | coding |
| up   | coding |
| down | coding |
| up   | coding |
| up   | coding |
| down | coding |
| up   | coding |
| down | coding |
| down | coding |
| down | coding |
| up   | coding |
| down | coding |
| down | coding |
| down | coding |
| up   | coding |
| down | coding |
| down | coding |
| down | coding |
| up   | coding |
| down | coding |
| down | coding |
| up   | coding |





|      |        |
|------|--------|
| up   | coding |
| down | coding |
| up   | coding |
| down | coding |
| up   | coding |
| down | coding |
| down | coding |
| down | coding |
| up   | coding |
| up   | coding |
| down | coding |
| up   | coding |
| up   | coding |
| down | coding |
| up   | coding |
| down | coding |
| down | coding |
| down | coding |
| up   | coding |
| down | coding |
| up   | coding |
| up   | coding |
| up   | coding |
| down | coding |
| up   | coding |
| up   | coding |
| up   | coding |
| down | coding |
| down | coding |
| down | coding |

|      |        |
|------|--------|
| up   | coding |
| up   | coding |
| up   | coding |
| down | coding |
| up   | coding |
| down | coding |
| down | coding |
| up   | coding |
| down | coding |
| down | coding |
| up   | coding |
| up   | coding |
| down | coding |
| down | coding |
| down | coding |
| up   | coding |
| down | coding |
| down | coding |
| up   | coding |
| down | coding |
| up   | coding |
| down | coding |
| up   | coding |
| down | coding |
| up   | coding |
| down | coding |
| down | coding |
| down | coding |
| up   | coding |
| up   | coding |
| up   | coding |
| down | coding |
| down | coding |
| down | coding |
| up   | coding |

|      |        |
|------|--------|
| up   | coding |
| down | coding |
| down | coding |
| up   | coding |
| up   | coding |
| down | coding |
| up   | coding |
| up   | coding |
| down | coding |
| up   | coding |
| down | coding |
| down | coding |
| down | coding |
| up   | coding |
| down | coding |
| up   | coding |
| up   | coding |
| up   | coding |
| down | coding |
| down | coding |
| up   | coding |
| down | coding |
| down | coding |
| up   | coding |
| up   | coding |
| up   | coding |
| down | coding |
| up   | coding |
| down | coding |
| down | coding |
| down | coding |
| up   | coding |
| up   | coding |
| down | coding |
| up   | coding |
| down | coding |

|      |        |
|------|--------|
| down | coding |
| up   | coding |
| down | coding |
| down | coding |
| up   | coding |
| down | coding |
| down | coding |
| up   | coding |
| down | coding |
| up   | coding |
| down | coding |
| down | coding |
| down | coding |
| up   | coding |
| down | coding |
| up   | coding |
| down | coding |
| up   | coding |
| up   | coding |
| up   | coding |
| down | coding |
| up   | coding |
| down | coding |
| up   | coding |
| up   | coding |
| up   | coding |

|      |        |
|------|--------|
| down | coding |
| up   | coding |
| down | coding |
| up   | coding |
| down | coding |
| up   | coding |
| up   | coding |
| down | coding |
| up   | coding |
| up   | coding |
| down | coding |
| up   | coding |
| up   | coding |
| down | coding |
| up   | coding |
| up   | coding |
| down | coding |
| up   | coding |
| up   | coding |
| down | coding |
| up   | coding |

|      |        |
|------|--------|
| down | coding |
| up   | coding |
| down | coding |
| up   | coding |
| down | coding |
| down | coding |
| up   | coding |
| down | coding |
| down | coding |
| up   | coding |
| down | coding |
| up   | coding |
| up   | coding |
| up   | coding |
| down | coding |
| down | coding |
| down | coding |
| up   | coding |
| down | coding |
| down | coding |
| down | coding |
| up   | coding |
| down | coding |
| up   | coding |
| up   | coding |
| down | coding |
| down | coding |
| down | coding |
| up   | coding |
| down | coding |
| down | coding |
| up   | coding |
| down | coding |
| down | coding |
| up   | coding |
| down | coding |
| up   | coding |
| down | coding |
| up   | coding |
| up   | coding |

|      |        |
|------|--------|
| up   | coding |
| down | coding |
| up   | coding |
| down | coding |
| up   | coding |
| down | coding |
| down | coding |
| down | coding |
| up   | coding |
| down | coding |
| up   | coding |
| down | coding |
| down | coding |
| down | coding |
| up   | coding |
| down | coding |
| down | coding |
| up   | coding |
| down | coding |
| down | coding |
| up   | coding |
| down | coding |
| up   | coding |
| up   | coding |
| up   | coding |
| down | coding |
| down | coding |
| up   | coding |
| down | coding |
| up   | coding |
| down | coding |
| up   | coding |
| up   | coding |
| down | coding |
| down | coding |
| up   | coding |

|      |        |
|------|--------|
| up   | coding |
| down | coding |
| up   | coding |
| down | coding |
| up   | coding |
| down | coding |
| down | coding |
| up   | coding |
| down | coding |
| down | coding |
| down | coding |
| up   | coding |
| down | coding |
| up   | coding |
| up   | coding |
| down | coding |
| up   | coding |
| down | coding |
| up   | coding |
| down | coding |
| up   | coding |
| down | coding |
| up   | coding |
| down | coding |
| up   | coding |
| down | coding |
| down | coding |
| up   | coding |



|      |        |
|------|--------|
| up   | coding |
| up   | coding |
| down | coding |
| up   | coding |
| down | coding |
| down | coding |
| down | coding |
| up   | coding |
| up   | coding |
| up   | coding |
| down | coding |
| up   | coding |
| down | coding |
| up   | coding |
| down | coding |
| up   | coding |
| down | coding |
| up   | coding |
| up   | coding |

|      |        |
|------|--------|
| down | coding |
| up   | coding |
| down | coding |
| up   | coding |
| down | coding |
| up   | coding |
| up   | coding |
| up   | coding |
| down | coding |
| up   | coding |
| down | coding |
| up   | coding |
| down | coding |
| down | coding |
| up   | coding |
| down | coding |
| down | coding |
| up   | coding |
| down | coding |
| up   | coding |
| down | coding |
| down | coding |
| down | coding |
| up   | coding |
| up   | coding |
| down | coding |
| up   | coding |
| up   | coding |
| up   | coding |
| down | coding |
| down | coding |
| down | coding |

|      |        |
|------|--------|
| up   | coding |
| down | coding |
| up   | coding |
| down | coding |
| up   | coding |
| down | coding |
| down | coding |
| down | coding |
| up   | coding |
| down | coding |
| down | coding |
| down | coding |
| up   | coding |
| down | coding |
| up   | coding |
| down | coding |
| up   | coding |
| down | coding |
| up   | coding |
| down | coding |
| down | coding |
| up   | coding |
| down | coding |
| up   | coding |
| up   | coding |
| down | coding |
| up   | coding |
| up   | coding |
| down | coding |
| up   | coding |
| up   | coding |
| down | coding |
| up   | coding |
| down | coding |
| down | coding |
| down | coding |

|      |        |
|------|--------|
| up   | coding |
| down | coding |
| up   | coding |
| up   | coding |
| up   | coding |
| down | coding |
| up   | coding |
| down | coding |
| down | coding |
| up   | coding |
| up   | coding |
| down | coding |
| down | coding |
| up   | coding |
| down | coding |
| up   | coding |
| down | coding |
| up   | coding |
| up   | coding |
| up   | coding |
| down | coding |
| up   | coding |
| up   | coding |
| down | coding |
| down | coding |
| up   | coding |
| down | coding |
| down | coding |

|      |        |
|------|--------|
| up   | coding |
| down | coding |
| up   | coding |
| up   | coding |
| down | coding |
| up   | coding |
| down | coding |
| up   | coding |
| up   | coding |
| down | coding |
| up   | coding |
| down | coding |
| up   | coding |
| down | coding |
| down | coding |
| up   | coding |
| up   | coding |
| down | coding |
| up   | coding |
| down | coding |
| up   | coding |
| up   | coding |
| up   | coding |
| down | coding |
| down | coding |
| down | coding |
| up   | coding |
| down | coding |
| down | coding |
| down | coding |
| up   | coding |
| up   | coding |

|      |        |
|------|--------|
| up   | coding |
| down | coding |
| up   | coding |
| down | coding |
| up   | coding |
| down | coding |
| up   | coding |
| down | coding |
| up   | coding |
| down | coding |
| up   | coding |
| down | coding |
| up   | coding |
| up   | coding |
| down | coding |
| up   | coding |
| down | coding |
| up   | coding |
| up   | coding |
| up   | coding |
| down | coding |
| up   | coding |
| down | coding |
| down | coding |
| down | coding |
| up   | coding |
