# Supplementary material for: Differentiation‐Associated MicroRNA Alterations in Mouse Heart‐Derived Sca‐1+CD31− and Sca‐1+CD31+ Cells
Source: Hindawi journal article supplement (doi:10.1155/2016/9586751), 2016-01-01
Supplement: f1 [file 9586751.f1.zip]

| Pathway ID | Pathway Name                                | Diff Gene Counts in Pathway | Gene Amount in Pathway |
|------------|---------------------------------------------|-----------------------------|------------------------|
| 4151       | PI3K-Akt signaling pathway                  | 73                          | 356                    |
| 5200       | Pathways in cancer                          | 69                          | 326                    |
| 5205       | Proteoglycans in cancer                     | 57                          | 230                    |
| 4360       | Axon guidance                               | 43                          | 133                    |
| 5166       | HTLV-I infection                            | 57                          | 290                    |
| 5161       | Hepatitis B                                 | 42                          | 149                    |
| 4010       | MAPK signaling pathway                      | 53                          | 259                    |
| 4510       | Focal adhesion                              | 46                          | 205                    |
| 4810       | Regulation of actin cytoskeleton            | 46                          | 217                    |
| 4722       | Neurotrophin signaling pathway              | 34                          | 123                    |
| 4310       | Wnt signaling pathway                       | 35                          | 148                    |
| 4910       | Insulin signaling pathway                   | 34                          | 141                    |
| 4012       | ErbB signaling pathway                      | 27                          | 87                     |
| 5220       | Chronic myeloid leukemia                    | 25                          | 74                     |
| 5223       | Non-small cell lung cancer                  | 22                          | 55                     |
| 4916       | Melanogenesis                               | 28                          | 100                    |
| 5218       | Melanoma                                    | 24                          | 73                     |
| 5215       | Prostate cancer                             | 26                          | 89                     |
| 4141       | Protein processing in endoplasmic reticulum | 34                          | 169                    |
| 5202       | Transcriptional misregulation in cancer     | 35                          | 181                    |

| Enrichment Score | p-value   | FDR      |
|------------------|-----------|----------|
| 5.9557588        | 9.89E-35  | 2.30E-32 |
| 6.1474602        | 8.55E-34  | 9.96E-32 |
| 7.1979903        | 5.86E-32  | 4.55E-30 |
| 9.3903343        | 1.28E-29  | 7.48E-28 |
| 5.7087509        | 2.33E-26  | 1.08E-24 |
| 8.1870465        | 2.87E-26  | 1.12E-24 |
| 5.9434737        | 1.82E-25  | 6.05E-24 |
| 6.5173074        | 4.92E-24  | 1.43E-22 |
| 6.1569033        | 6.254E-23 | 1.62E-21 |
| 8.0285671        | 3.49E-21  | 8.13E-20 |
| 6.868637         | 2.355E-19 | 4.99E-18 |
| 7.0036437        | 4.024E-19 | 7.81E-18 |
| 9.0138173        | 1.673E-18 | 3.00E-17 |
| 9.8123386        | 3.155E-18 | 5.25E-17 |
| 11.617809        | 5.068E-18 | 7.87E-17 |
| 8.1324662        | 8.181E-18 | 1.19E-16 |
| 9.548884         | 3.138E-17 | 4.30E-16 |
| 8.4849166        | 3.962E-17 | 5.13E-16 |
| 5.8432767        | 1.62E-16  | 1.99E-15 |
| 5.6163441        | 2.113E-16 | 2.45E-15 |

## Gene Symbols

|Ifnar1|Ywhaq|Creb3l4|Itgb8|Itga11|Ywhaz|Ikbkb|Gnb4|Ppp2r1b|Igf1|Pik3cb|Ppp2r5a|Fgf20|Fgf16|Kdr|Rheb|Ppp2r5c|Ppp2r5d|Fgf7|Ctla4|Fas|E2f2|Fgf7|Smo|Crkl|Rela|Mapk8|Mapk1|Akt3|Fgf14|Rarb|Traf1|Mapk3|Cebpa|Pten|Zbtb16|Sos1|Stat5b|Fgf1|Map2k1|Lamc2|Kit|Prkacb|Wnt9a|Arhgef1|Thbs1|Hbegf|Fgf16|Prkcb|Fgf7|Kdr|Gab1|Met|Kras|Pik3r1|Fzd3|Pik3cd|Hoxa10|Rock1|Pik3ca|Igf1|Tgfb2|Sdc4|Plxnc1|Cfl2|Slit2|Nrp1|Mapk1|Srgap3|Cdk5|Rgs3|Pak2|Mapk3|Nfatc3|Arhgef12|Ntn1|Pak4|Plxna2|Plxna4|Sema3f|Sema3b|Sema4d|Wnt5a|Cdc27|Tgfb2|Akt2|Wnt8a|Atf2|Nfatc3|Wnt3|Pik3ca|Wnt9a|Wnt7b|E2f2|Vac14|Pik3cd|Bax|Nfatc1|Stat5b|Bcl2l1|Fzd5|Map2k4|Bax|Ccna2|Cdkn1a|Nfat5|E2f2|Atf2|Ccnd1|Stat5b|Elk1|Ifnar1|Tgfb2|Cdkn1b|Bcl2|Rela|Ywhaz|Fos|Egr2|Ywhaq|Akt2|Fas|Pik3cd|Crel|Mef2c|Cacna2d1|Prkcb|Fas|Kras|Prkacb|Mknk2|Tgfb2|Mapk8ip2|Nras|Ppp3r1|Sos1|Dusp2|Cacna2d2|Mapk8|Stk4|Mapk3|Taok2|Pp2r1b|Mapk1|Mapk8|Itgb1|Rap1b|Itga8|Elk1|Crkl|Map2k1|Mapk3|Rock1|Zyx|Tnc|Itga7|Akt3|Col5a1|Ccnd1|Mylk4|Kdr|Itgb8|Parva|Myk|Pik3r1|Itga7|Wasf2|Pak2|Fgf7|Fgfr3|Itga8|Myk4|Itga11|Sos1|Diap2|Fgf16|Itga10|Fgf1|Fgf14|Pik3ca|Itgb1|Pik3cd|Itgb8|Itga1|Fgd3|Gna13|Fgf7|Fgf14|Fgf16|Fgf17|Fgf18|Fgf19|Fgf20|Fgf21|Fgf22|Fgf23|Fgf24|Fgf25|Fgf26|Fgf27|Fgf28|Fgf29|Fgf30|Fgf31|Fgf32|Fgf33|Fgf34|Fgf35|Fgf36|Fgf37|Fgf38|Fgf39|Fgf40|Fgf41|Fgf42|Fgf43|Fgf44|Fgf45|Fgf46|Fgf47|Fgf48|Fgf49|Fgf50|Fgf51|Fgf52|Fgf53|Fgf54|Fgf55|Fgf56|Fgf57|Fgf58|Fgf59|Fgf60|Fgf61|Fgf62|Fgf63|Fgf64|Fgf65|Fgf66|Fgf67|Fgf68|Fgf69|Fgf70|Fgf71|Fgf72|Fgf73|Fgf74|Fgf75|Fgf76|Fgf77|Fgf78|Fgf79|Fgf80|Fgf81|Fgf82|Fgf83|Fgf84|Fgf85|Fgf86|Fgf87|Fgf88|Fgf89|Fgf90|Fgf91|Fgf92|Fgf93|Fgf94|Fgf95|Fgf96|Fgf97|Fgf98|Fgf99|Fgf100|Fgf101|Fgf102|Fgf103|Fgf104|Fgf105|Fgf106|Fgf107|Fgf108|Fgf109|Fgf110|Fgf111|Fgf112|Fgf113|Fgf114|Fgf115|Fgf116|Fgf117|Fgf118|Fgf119|Fgf120|Fgf121|Fgf122|Fgf123|Fgf124|Fgf125|Fgf126|Fgf127|Fgf128|Fgf129|Fgf130|Fgf131|Fgf132|Fgf133|Fgf134|Fgf135|Fgf136|Fgf137|Fgf138|Fgf139|Fgf140|Fgf141|Fgf142|Fgf143|Fgf144|Fgf145|Fgf146|Fgf147|Fgf148|Fgf149|Fgf150|Fgf151|Fgf152|Fgf153|Fgf154|Fgf155|Fgf156|Fgf157|Fgf158|Fgf159|Fgf160|Fgf161|Fgf162|Fgf163|Fgf164|Fgf165|Fgf166|Fgf167|Fgf168|Fgf169|Fgf170|Fgf171|Fgf172|Fgf173|Fgf174|Fgf175|Fgf176|Fgf177|Fgf178|Fgf179|Fgf180|Fgf181|Fgf182|Fgf183|Fgf184|Fgf185|Fgf186|Fgf187|Fgf188|Fgf189|Fgf190|Fgf191|Fgf192|Fgf193|Fgf194|Fgf195|Fgf196|Fgf197|Fgf198|Fgf199|Fgf200|Fgf201|Fgf202|Fgf203|Fgf204|Fgf205|Fgf206|Fgf207|Fgf208|Fgf209|Fgf210|Fgf211|Fgf212|Fgf213|Fgf214|Fgf215|Fgf216|Fgf217|Fgf218|Fgf219|Fgf220|Fgf221|Fgf222|Fgf223|Fgf224|Fgf225|Fgf226|Fgf227|Fgf228|Fgf229|Fgf230|Fgf231|Fgf232|Fgf233|Fgf234|Fgf235|Fgf236|Fgf237|Fgf238|Fgf239|Fgf240|Fgf241|Fgf242|Fgf243|Fgf244|Fgf245|Fgf246|Fgf247|Fgf248|Fgf249|Fgf250|Fgf251|Fgf252|Fgf253|Fgf254|Fgf255|Fgf256|Fgf257|Fgf258|Fgf259|Fgf260|Fgf261|Fgf262|Fgf263|Fgf264|Fgf265|Fgf266|Fgf267|Fgf268|Fgf269|Fgf270|Fgf271|Fgf272|Fgf273|Fgf274|Fgf275|Fgf276|Fgf277|Fgf278|Fgf279|Fgf280|Fgf281|Fgf282|Fgf283|Fgf284|Fgf285|Fgf286|Fgf287|Fgf288|Fgf289|Fgf290|Fgf291|Fgf292|Fgf293|Fgf294|Fgf295|Fgf296|Fgf297|Fgf298|Fgf299|Fgf300|Fgf301|Fgf302|Fgf303|Fgf304|Fgf305|Fgf306|Fgf307|Fgf308|Fgf309|Fgf310|Fgf311|Fgf312|Fgf313|Fgf314|Fgf315|Fgf316|Fgf317|Fgf318|Fgf319|Fgf320|Fgf321|Fgf322|Fgf323|Fgf324|Fgf325|Fgf326|Fgf327|Fgf328|Fgf329|Fgf330|Fgf331|Fgf332|Fgf333|Fgf334|Fgf335|Fgf336|Fgf337|Fgf338|Fgf339|Fgf340|Fgf341|Fgf342|Fgf343|Fgf344|Fgf345|Fgf346|Fgf347|Fgf348|Fgf349|Fgf350|Fgf351|Fgf352|Fgf353|Fgf354|Fgf355|Fgf356|Fgf357|Fgf358|Fgf359|Fgf360|Fgf361|Fgf362|Fgf363|Fgf364|Fgf365|Fgf366|Fgf367|Fgf368|Fgf369|Fgf370|Fgf371|Fgf372|Fgf373|Fgf374|Fgf375|Fgf376|Fgf377|Fgf378|Fgf379|Fgf380|Fgf381|Fgf382|Fgf383|Fgf384|Fgf385|Fgf386|Fgf387|Fgf388|Fgf389|Fgf390|Fgf391|Fgf392|Fgf393|Fgf394|Fgf395|Fgf396|Fgf397|Fgf398|Fgf399|Fgf400|Fgf401|Fgf402|Fgf403|Fgf404|Fgf405|Fgf406|Fgf407|Fgf408|Fgf409|Fgf410|Fgf411|Fgf412|Fgf413|Fgf414|Fgf415|Fgf416|Fgf417|Fgf418|Fgf419|Fgf420|Fgf421|Fgf422|Fgf423|Fgf424|Fgf425|Fgf426|Fgf427|Fgf428|Fgf429|Fgf430|Fgf431|Fgf432|Fgf433|Fgf434|Fgf435|Fgf436|Fgf437|Fgf438|Fgf439|Fgf440|Fgf441|Fgf442|Fgf443|Fgf444|Fgf445|Fgf446|Fgf447|Fgf448|Fgf449|Fgf450|Fgf451|Fgf452|Fgf453|Fgf454|Fgf455|Fgf456|Fgf457|Fgf458|Fgf459|Fgf460|Fgf461|Fgf462|Fgf463|Fgf464|Fgf465|Fgf466|Fgf467|Fgf468|Fgf469|Fgf470|Fgf471|Fgf472|Fgf473|Fgf474|Fgf475|Fgf476|Fgf477|Fgf478|Fgf479|Fgf480|Fgf481|Fgf482|Fgf483|Fgf484|Fgf485|Fgf486|Fgf487|Fgf488|Fgf489|Fgf490|Fgf491|Fgf492|Fgf493|Fgf494|Fgf495|Fgf496|Fgf497|Fgf498|Fgf499|Fgf500|Fgf501|Fgf502|Fgf503|Fgf504|Fgf505|Fgf506|Fgf507|Fgf508|Fgf509|Fgf510|Fgf511|Fgf512|Fgf513|Fgf514|Fgf515|Fgf516|Fgf517|Fgf518|Fgf519|Fgf520|Fgf521|Fgf522|Fgf523|Fgf524|Fgf525|Fgf526|Fgf527|Fgf528|Fgf529|Fgf530|Fgf531|Fgf532|Fgf533|Fgf534|Fgf535|Fgf536|Fgf537|Fgf538|Fgf539|Fgf540|Fgf541|Fgf542|Fgf543|Fgf544|Fgf545|Fgf546|Fgf547|Fgf548|Fgf549|Fgf550|Fgf551|Fgf552|Fgf553|Fgf554|Fgf555|Fgf556|Fgf557|Fgf558|Fgf559|Fgf560|Fgf561|Fgf562|Fgf563|Fgf564|Fgf565|Fgf566|Fgf567|Fgf568|Fgf569|Fgf570|Fgf571|Fgf572|Fgf573|Fgf574|Fgf575|Fgf576|Fgf577|Fgf578|Fgf579|Fgf580|Fgf581|Fgf582|Fgf583|Fgf584|Fgf585|Fgf586|Fgf587|Fgf588|Fgf589|Fgf590|Fgf591|Fgf592|Fgf593|Fgf594|Fgf595|Fgf596|Fgf597|Fgf598|Fgf599|Fgf600|Fgf601|Fgf602|Fgf603|Fgf604|Fgf605|Fgf606|Fgf607|Fgf608|Fgf609|Fgf610|Fgf611|Fgf612|Fgf613|Fgf614|Fgf615|Fgf616|Fgf617|Fgf618|Fgf619|Fgf620|Fgf621|Fgf622|Fgf623|Fgf624|Fgf625|Fgf626|Fgf627|Fgf628|Fgf629|Fgf630|Fgf631|Fgf632|Fgf633|Fgf634|Fgf635|Fgf636|Fgf637|Fgf638|Fgf639|Fgf640|Fgf641|Fgf642|Fgf643|Fgf644|Fgf645|Fgf646|Fgf647|Fgf648|Fgf649|Fgf650|Fgf651|Fgf652|Fgf653|Fgf654|Fgf655|Fgf656|Fgf657|Fgf658|Fgf659|Fgf660|Fgf661|Fgf662|Fgf663|Fgf664|Fgf665|Fgf666|Fgf667|Fgf668|Fgf669|Fgf670|Fgf671|Fgf672|Fgf673|Fgf674|Fgf675|Fgf676|Fgf677|Fgf678|Fgf679|Fgf680|Fgf681|Fgf682|Fgf683|Fgf684|Fgf685|Fgf686|Fgf687|Fgf688|Fgf689|Fgf690|Fgf691|Fgf692|Fgf693|Fgf694|Fgf695|Fgf696|Fgf697|Fgf698|Fgf699|Fgf700|Fgf701|Fgf702|Fgf703|Fgf704|Fgf705|Fgf706|Fgf707|Fgf708|Fgf709|Fgf710|Fgf711|Fgf712|Fgf713|Fgf714|Fgf715|Fgf716|Fgf717|Fgf718|Fgf719|Fgf720|Fgf721|Fgf722|Fgf723|Fgf724|Fgf725|Fgf726|Fgf727|Fgf728|Fgf729|Fgf730|Fgf731|Fgf732|Fgf733|Fgf734|Fgf735|Fgf736|Fgf737|Fgf738|Fgf739|Fgf740|Fgf741|Fgf742|Fgf743|Fgf744|Fgf745|Fgf746|Fgf747|Fgf748|Fgf749|Fgf750|Fgf751|Fgf752|Fgf753|Fgf754|Fgf755|Fgf756|Fgf757|Fgf758|Fgf759|Fgf760|Fgf761|Fgf762|Fgf763|Fgf764|Fgf765|Fgf766|Fgf767|Fgf768|Fgf769|Fgf770|Fgf771|Fgf772|Fgf773|Fgf774|Fgf775|Fgf776|Fgf777|Fgf778|Fgf779|Fgf780|Fgf781|Fgf782|Fgf783|Fgf784|Fgf785|Fgf786|Fgf787|Fgf788|Fgf789|Fgf790|Fgf791|Fgf792|Fgf793|Fgf794|Fgf795|Fgf796|Fgf797|Fgf798|Fgf799|Fgf800|Fgf801|Fgf802|Fgf803|Fgf804|Fgf805|Fgf806|Fgf807|Fgf808|Fgf809|Fgf810|Fgf811|Fgf812|Fgf813|Fgf814|Fgf815|Fgf816|Fgf817|Fgf818|Fgf819|Fgf820|Fgf821|Fgf822|Fgf823|Fgf824|Fgf825|Fgf826|Fgf827|Fgf828|Fgf829|Fgf830|Fgf831|Fgf832|Fgf833|Fgf834|Fgf835|Fgf836|Fgf837|Fgf838|Fgf839|Fgf840|Fgf841|Fgf842|Fgf843|Fgf844|Fgf845|Fgf846|Fgf847|Fgf848|Fgf849|Fgf850|Fgf851|Fgf852|Fgf853|Fgf854|Fgf855|Fgf856|Fgf857|Fgf858|Fgf859|Fgf860|Fgf861|Fgf862|Fgf863|Fgf864|Fgf865|Fgf866|Fgf867|Fgf868|Fgf869|Fgf870|Fgf871|Fgf872|Fgf873|Fgf874|Fgf875|Fgf876|Fgf877|Fgf878|Fgf879|Fgf880|Fgf881|Fgf882|Fgf883|Fgf884|Fgf885|Fgf886|Fgf887|Fgf888|Fgf889|Fgf890|Fgf891|Fgf892|Fgf893|Fgf894|Fgf895|Fgf896|Fgf897|Fgf898|Fgf899|Fgf900|Fgf901|Fgf902|Fgf903|Fgf904|Fgf905|Fgf906|Fgf907|Fgf908|Fgf909|Fgf910|Fgf911|Fgf912|Fgf913|Fgf914|Fgf915|Fgf916|Fgf917|Fgf918|Fgf919|Fgf920|Fgf921|Fgf922|Fgf923|Fgf924|Fgf925|Fgf926|Fgf927|Fgf928|Fgf929|Fgf930|Fgf931|Fgf932|Fgf933|Fgf934|Fgf935|Fgf936|Fgf937|Fgf938|Fgf939|Fgf940|Fgf941|Fgf942|Fgf943|Fgf944|Fgf945|Fgf946|Fgf947|Fgf948|Fgf949|Fgf950|Fgf951|Fgf952|Fgf953|Fgf954|Fgf955|Fgf956|Fgf957|Fgf958|Fgf959|Fgf960|Fgf961|Fgf962|Fgf963|Fgf964|Fgf965|Fgf966|Fgf967|Fgf968|Fgf969|Fgf970|Fgf971|Fgf972|Fgf973|Fgf974|Fgf975|Fgf976|Fgf977|Fgf978|Fgf979|Fgf980|Fgf981|Fgf982|Fgf983|Fgf984|Fgf985|Fgf986|Fgf987|Fgf988|Fgf989|Fgf990|Fgf991|Fgf992|Fgf993|Fgf994|Fgf995|Fgf996|Fgf997|Fgf998|Fgf999|Fgf1000|Fgf1001|Fgf1002|Fgf1003|Fgf1004|Fgf1005|Fgf1006|Fgf1007|Fgf1008|Fgf1009|Fgf1010|Fgf1011|Fgf1012|Fgf1013|Fgf1014|Fgf1015|Fgf1016|Fgf1017|Fgf1018|Fgf1019|Fgf1020|Fgf1021|Fgf1022|Fgf1023|Fgf1024|Fgf1025|Fgf1026|Fgf1027|Fgf1028|Fgf1029|Fgf1030|Fgf1031|Fgf1032|Fgf1033|Fgf1034|Fgf1035|Fgf1036|Fgf1037|Fgf1038|Fgf1039|Fgf1040|Fgf1041|Fgf1042|Fgf1043|Fgf1044|Fgf1045|Fgf1046|Fgf1047|Fgf1048|Fgf1049|Fgf1050|Fgf1051|Fgf1052|Fgf1053|Fgf1054|Fgf1055|Fgf1056|Fgf1057|Fgf1058|Fgf1059|Fgf1060|Fgf1061|Fgf1062|Fgf1063|Fgf1064|Fgf1065|Fgf1066|Fgf1067|Fgf1068|Fgf1069|Fgf1070|Fgf1071|Fgf1072|Fgf1073|Fgf1074|Fgf1075|Fgf1076|Fgf1077|Fgf1078|Fgf1079|Fgf1080|Fgf1081|Fgf1082|Fgf1083|Fgf1084|Fgf1085|Fgf1086|Fgf1087|Fgf1088|Fgf1089|Fgf1090|Fgf1091|Fgf1092|Fgf1093|Fgf1094|Fgf1095|Fgf1096|Fgf1097|Fgf1098|Fgf1099|Fgf1100|Fgf1101|Fgf1102|Fgf1103|Fgf1104|Fgf1105|Fgf1106|Fgf1107|Fgf1108|Fgf1109|Fgf1110|Fgf1111|Fgf1112|Fgf1113|Fgf1114|Fgf1115|Fgf1116|Fgf1117|Fgf1118|Fgf1119|Fgf1120|Fgf1121|Fgf1122|Fgf1123|Fgf1124|Fgf1125|Fgf1126|Fgf1127|Fgf1128|Fgf1129|Fgf1130|Fgf1131|Fgf1132|Fgf1133|Fgf1134|Fgf1135|Fgf1136|Fgf1137|Fgf1138|Fgf1139|Fgf1140|Fgf1141|Fgf1142|Fgf1143|Fgf1144|Fgf1145|Fgf1146|Fgf1147|Fgf1148|Fgf1149|Fgf1150|Fgf1151|Fgf1152|Fgf1153|Fgf1154|Fgf1155|Fgf1156|Fgf1157|Fgf1158|Fgf1159|Fgf1160|Fgf1161|Fgf1162|Fgf1163|Fgf1164|Fgf1165|Fgf1166|Fgf1167|Fgf1168|Fgf1169|Fgf1170|Fgf1171|Fgf1172|Fgf1173|Fgf1174|Fgf1175|Fgf1176|Fgf1177|Fgf1178|Fgf1179|Fgf1180|Fgf1181|Fgf1182|Fgf1183|Fgf1184|Fgf1185|Fgf1186|Fgf1187|Fgf1188|Fgf1189|Fgf1190|Fgf1191|Fgf1192|Fgf1193|Fgf1194|Fgf1195|Fgf1196|Fgf1197|Fgf1198|Fgf1199|Fgf1200|Fgf1201|Fgf1202|Fgf1203|Fgf1204|Fgf1205|Fgf1206|Fgf1207|Fgf1208|Fgf1209|Fgf1210|Fgf1211|Fgf1212|Fgf1213|Fgf1214|Fgf1215|Fgf1216|Fgf1217|Fgf1218|Fgf1219|Fgf1220|Fgf1221|Fgf1222|Fgf1223|Fgf1224|Fgf1225|Fgf1226|Fgf1227|Fgf1228|Fgf1229|Fgf1230|Fgf1231|Fgf1232|Fgf1233|Fgf1234|Fgf1235|Fgf1236|Fgf1237|Fgf1238|Fgf1239|Fgf1240|Fgf1241|Fgf1242|Fgf1243|Fgf1244|Fgf1245|Fgf1246|Fgf1247|Fgf1248|Fgf1249|Fgf1250|Fgf1251|Fgf1252|Fgf1253|Fgf1254|Fgf1255|Fgf1256|Fgf1257|Fgf1258|Fgf1259|Fgf1260|Fgf1261|Fgf1262|Fgf1263|Fgf1264|Fgf1265|Fgf1266|Fgf1267|Fgf1268|Fgf1269|Fgf1270|Fgf1271|Fgf1272|Fgf1273|Fgf1274|Fgf1275|Fgf1276|Fgf1277|Fgf1278|Fgf1279|Fgf1280|Fgf1281|Fgf1282|Fgf1283|Fgf1284|Fgf1285|Fgf1286|Fgf1287|Fgf1288|Fgf1289|Fgf1290|Fgf1291|Fgf1292|Fgf1293|Fgf1294|Fgf1295|Fgf1296|Fgf1297|Fgf1298|Fgf1299|Fgf1300|Fgf1301|Fgf1302|Fgf1303|Fgf1304|Fgf1305|Fgf1306|Fgf1307|Fgf1308|Fgf1309|Fgf1310|Fgf1311|Fgf1312|Fgf1313|Fgf1314|Fgf1315|Fgf1316|Fgf1317|Fgf1318|Fgf1319|Fgf1320|Fgf1321|Fgf1322|Fgf1323|Fgf1324|Fgf1325|Fgf1326|Fgf1327|Fgf1328|Fgf1329|Fgf1330|Fgf1331|Fgf1332|Fgf1333|Fgf1334|Fgf1335|Fgf1336|Fgf1337|Fgf1338|Fgf1339|Fgf1340|Fgf1341|Fgf1342|Fgf1343|Fgf1344|Fgf1345|Fgf1346|Fgf1347|Fgf1348|Fgf1349|Fgf1350|Fgf1351|Fgf1352|Fgf1353|Fgf1354|Fgf1355|Fgf1356|Fgf1357|Fgf1358|Fgf1359|Fgf1360|Fgf1361|Fgf1362|Fgf1363|Fgf1364|Fgf1365|Fgf1366|Fgf1367|Fgf1368|Fgf1369|Fgf1370|Fgf1371|Fgf1372|Fgf1373|Fgf1374|Fgf1375|Fgf1376|Fgf1377|Fgf1378|Fgf1379|Fgf1380|Fgf1381|Fgf1382|Fgf1383|Fgf1384|Fgf1385|Fgf1386|Fgf1387|Fgf1388|Fgf1389|Fgf1390|Fgf1391|Fgf1392|Fgf1393|Fgf1394|Fgf1395|Fgf1396|Fgf1397|Fgf1398|Fgf1399|Fgf1400|Fgf1401|Fgf1402|Fgf1403|Fgf1404|Fgf1405|Fgf1406|Fgf1407|Fgf1408|Fgf1409|Fgf1410|Fgf1411|Fgf1412|Fgf1413|Fgf1414|Fgf1415|Fgf1416|Fgf1417|Fgf1418|Fgf1419|Fgf1420|Fgf1421|Fgf1422|Fgf1423|Fgf1424|Fgf1425|Fgf1426|Fgf1427|Fgf1428|Fgf1429|Fgf1430|Fgf1431|Fgf1432|Fgf1433|Fgf1434|Fgf1435|Fgf1436|Fgf1437|Fgf1438|Fgf1439|Fgf1440|Fgf1441|Fgf1442|Fgf1443|Fgf1444|Fgf1445|Fgf1446|Fgf1447|Fgf1448|Fgf1449|Fgf1450|Fgf1451|Fgf1452|Fgf1453|Fgf1454|Fgf1455|Fgf1456|Fgf1457|Fgf1458|Fgf1459|Fgf1460|Fgf1461|Fgf1462|Fgf1463|Fgf1464|Fgf1465|Fgf1466|Fgf1467|Fgf1468|Fgf1469|Fgf1470|Fgf1471|Fgf1472|Fgf1473|Fgf1474|Fgf1475|Fgf1476|Fgf1477|Fgf1478|Fgf1479|Fgf1480|Fgf1481|Fgf1482|Fgf1483|Fgf1484|Fgf1485|Fgf1486|Fgf1487|Fgf1488|Fgf1489|Fgf1490|Fgf1491|Fgf1492|Fgf1493|Fgf1494|Fgf1495|Fgf1496|Fgf1497|Fgf1498|Fgf1499|Fgf1500|Fgf1501|Fgf1502|Fgf1503|Fgf1504|Fgf1505|Fgf1506|Fgf1507|Fgf1508|Fgf1509|Fgf1510|Fgf1511|Fgf1512|Fgf1513|Fgf1514|Fgf1515|Fgf1516|Fgf1517|Fgf1518|Fgf1519|Fgf1520|Fgf1521|Fgf1522|Fgf1523|Fgf1524|Fgf1525|Fgf1526|Fgf1527|Fgf1528|Fgf1529|Fgf1530|Fgf1531|Fgf1532|Fgf1533|Fgf1534|Fgf1535|Fgf1536|Fgf1537|Fgf1538|Fgf1539|Fgf1540|Fgf1541|Fgf1542|Fgf1543|Fgf1544|Fgf1545|Fgf1546|Fgf1547|Fgf1548|Fgf1549|Fgf1550|Fgf1551|Fgf1552|Fgf1553|Fgf1554|Fgf1555|Fgf1556|Fgf1557|Fgf1558|Fgf1559|Fgf1560|Fgf1561|Fgf1562|Fgf1563|Fgf1564|Fgf1565|Fgf1566|Fgf1567|Fgf1568|Fgf1569|Fgf1570|Fgf1571|Fgf1572|Fgf1573|Fgf1574|Fgf1575|Fgf1576|Fgf1577|Fgf1578|Fgf1579|Fgf1580|Fgf1581|Fgf1582|Fgf1583|Fgf1584|Fgf1585|Fgf1586|Fgf1587|Fgf1588|Fgf1589|Fgf1590|Fgf1591|Fgf1592|Fgf1593|Fgf1594|Fgf1595|Fgf1596|Fgf1597|Fgf1598|Fgf1599|Fgf1600|Fgf1601|Fgf1602|Fgf1603|Fgf1604|Fgf1605|Fgf1606|Fgf1607|Fgf1608|Fgf1609|Fgf1610|Fgf1611|Fgf1612|Fgf1613|Fgf1614|Fgf1615|Fgf1616|Fgf1617|Fgf1618|Fgf1619|Fgf1620|Fgf1621|Fgf1622|Fgf1623|Fgf1624|Fgf1625|Fgf1626|Fgf1627|Fgf1628|Fgf1629|Fgf1630|Fgf1631|Fgf1632|Fgf1633|Fgf1634|Fgf1635|Fgf1636|Fgf1637|Fgf1638|Fgf1639|Fgf1640|Fgf1641|Fgf1642|Fgf1643|Fgf1644|Fgf1645|Fgf1646|Fgf1647|Fgf1648|Fgf1649|Fgf1650|Fgf1651|Fgf1652|Fgf1653|Fgf1654|Fgf1655|Fgf1656|Fgf1657|Fgf1658|Fgf1659|Fgf1660|Fgf1661|Fgf1662|Fgf1663|Fgf1664|Fgf1665|Fgf1666|Fgf1667|Fgf1668|Fgf1669|Fgf1670|Fgf1671|Fgf1672|Fgf1673|Fgf1674|Fgf1675|Fgf1676|Fgf1677|Fgf1678|Fgf1679|Fgf1680|Fgf1681|Fgf1682|Fgf1683|Fgf1684|Fgf1685|Fgf1686|Fgf1687|Fgf1688|Fgf1689|Fgf1690|Fgf1691|Fgf1692|Fgf1693|Fgf1694|Fgf1695|Fgf1696|Fgf1697|Fgf1698|Fgf1699|Fgf1700|Fgf1701|Fgf1702|Fgf1703|Fgf1704|Fgf1705|Fgf1706|Fgf1707|Fgf1708|Fgf1709|Fgf1710|Fgf1711|Fgf1712|Fgf1713|Fgf1714|Fgf1715|Fgf1716|Fgf1717|Fgf1718|Fgf1719|Fgf1720|Fgf1721|Fgf1722|Fgf1723|Fgf1724|Fgf1725|Fgf1726|Fgf1727|Fgf1728|Fgf1729|Fgf1730|Fgf1731|Fgf1732|Fgf1733|Fgf1734|Fgf1735|Fgf1736|Fgf1737|Fgf1738|Fgf1739|Fgf1740|Fgf1741|Fgf1742|Fgf1743|Fgf1744|Fgf1745|Fgf1746|Fgf1747|Fgf1748|Fgf1749|Fgf1750|Fgf1751|Fgf1752|Fgf1753|Fgf1754|Fgf1755|Fgf1756|Fgf1757|Fgf1758|Fgf1759|Fgf1760|Fgf1761|Fgf1762|Fgf1763|Fgf1764|Fgf1765|Fgf1766|Fgf1767|Fgf1768|Fgf1769|Fgf1770|Fgf1771|Fgf1772|Fgf1773|Fgf1774|Fgf1775|Fgf1776|Fgf1777|Fgf1778|Fgf1779|Fgf1780|Fgf1781|Fgf1782|Fgf1783|Fgf1784|Fgf1785|Fgf1786|Fgf1787|Fgf1788|Fgf1789|Fgf1790|Fgf1791|Fgf1792|Fgf1793|Fgf1794|Fgf1795|Fgf1796|Fgf1797|Fgf1798|Fgf1799|Fgf1800|Fgf1801|Fgf1802|Fgf1803|Fgf1804|Fgf1805|Fgf1806|Fgf1807|Fgf1808|Fgf1809|Fgf1810|Fgf1811|Fgf1812|Fgf1813|Fgf181

had|Chrm1|Col5a1|Irs1|Ppp2r3a|Itga7|Rela|Itgb1|Itga8|Map2k1|Mapk1|Fgf1|Flt1|Lpar2|Mlst8|Il2ra|Tsc1|Ppp2r2a|Pi  
|Wnt9a|Tgfb2|Bcl2l1|Cdkn1b|Wnt2b|Wnt5a|Prkcb|E2f3|Plcg2|Braf|Msh6|Pik3cb|Akt2|Nras|Bcl2|Pax8|Runx1t1|Ras  
1|Fgf14|Smol|Arhgef12|Fas|Pdcd4|Fgf20|Fzd6|Fzd9|Hoxd10|Sos1|Ank1|Wnt8a|Itgb1|Elk1|Fgf1|Frs2|Mapk1|Nras|F  
Kras|Unc5a|Limk2|Nfatc1|Met|Nras|Ntng1|Nfat5|Epha8|Nfatc4|Plxnb2|Sema3c|Sema3a|Itgb1|Ppp3r1|Gnai2|Efnb3  
Fzd3|Wnt2b|Nrp1|Nras|Zfp36|Prkacb|Ets1|Atm|Srf|Kras|Fzd6|Nfatc4|Pold3|Trp53inp1|Nfyb|Akt3|Map3k3|Pik3r1|Ez  
b1|Pik3r1|E2f3|Map2k1|Pten|Nfatc3|Nras|Cyts|Creb3l4|Map2k4|Mapk1|Nfatc1|Mapk8|Pik3cb|Nfatc4|Pik3ca|Mapk  
m1a|Fgf14|Bdnf|Dusp16|Fgf16|Ikbb|Map3k11|Rap1a|Srf|Map3k2|Fgf1|Fgf7|Rap1b|Cdc25b|Fos|Atf2|Ptprr|Fgf20|  
cb|Pik3ca|Pak2|Sos1|Itga10|Igf1|Chad|Itga11|Pgf|Pak4|Akt2|Pik3cd|Bcl2|Thbs1|Flt1|Ccnd2|Parvb|Rap1a|Met|Lam  
pd1|Chrm1|Fgf20|Pik3cb|Arhgef1|Mapk1|Nras|Mapk3|Tmsb4x|Pik3r1|Crkl|Abi2|Limk2|Wasl|Map2k1|Arpc5|Rock1|  
dnf|Ikbb|Crkl|Pik3ca|Akt3|Pik3cb|Camk4|Rps6ka5|Sos1|Pik3cd|Frs2|Nras|Rap1b|  
Nnt8a|Nkd1|Btrc|Siah1b|Camk2g|Rock1|Siah1a|Csnk2a1|Nfatc1|Lrp6|Fzd6|Ccnd2|Fzd4|Fzd9|Fzd3|Fzd5|  
Elk1|Prkar2a|Ppargc1a|Pik3cd|Kras|Akt2|Irs4|Crkl|Akt3|Trip10|Prkacb|Pik3ca|Braf|Pik3r1|  
Elk1|Stat5b|Braf|Sos1|Nras|Pak4|Cdkn1a|Plcg2|  
Ccnd1|Tgfb2|Cdkn1a|Stat5b|  
g2|E2f2|  
Iaq|Creb3l4|Fzd5|Adcy1|Map2k1|Mapk1|Fzd6|Wnt7b|  
k3|E2f3|Pik3cd|  
Elk1|Akt3|Braf|Mapk1|Cdkn1b|Akt2|  
I3|Hspa4l|Sar1a|Derl2|Ssr1|Sec24c|Rpn1|Mapk8|Ube2e3|Dnajc3|Rpn2|Txnrc5|Man1b1|Dnajb1|Rnf185|  
|Bcl6|Pax8|Ngfr|Runx1t1|Etv1|Ccnd2|Bcl2l1|Dot1l|Cebpa|Pbx1|Runx2|Slc45a3|Rela|Mycn|

ik3ca|Nras|Sos1|Pik3r1|Csf1|Itga10|Mapk3|Bcl2l1|Fgfr3|Ywhag|Cdkn1a|Tnc|Ngfr|Pgf|Kit|Pten|Creb1|Pik3cd|Fas|Itga  
sf5|Wnt3|Cycs|Pik3cd|Foxo1|Fzd6|Stk4|Fzd9|Fgf16|Wnt8a|Met|Kras|Wnt7b|Pgf|Rala|Pik3r1|Fzd4|Igf1|Itgb1|Fzd5|Ccn  
Fzd5|Timp3|Mapk3|Map2k1|Wnt3|Akt2|Pik3cb|Braf|Akt3|Plcg2|Wnt2b|Ccnd1|Fzd4|Camk2g|Wnt7b|Wnt5a|Cdkn1a|Ank  
|Ephb2|Cxcl12|Rock1|Robo1|Epha7|Epha5|Gnai3|  
2f3|Fos|Ikbkb|Fzd9|Il2ra|Adcy1|Nfat5|Fzd4|Elk1|Mapk8|Creb1|Ppp3r1|Egr2|Rela|Pik3cb|Ccnd1|Cdkn1a|Crtc1|Ccnd2|  
3|Akt3|Ikbkb|Prkcb|Kras|  
Map3k12|Dusp3|Akt2|Map3k3|Map2k1|Rela|Rps6ka5|Mapk8ip1|Mapk1|Map2k4|Fgfr3|Elk1|Nfatc4|Akt3|Pak2|Braf|Crkl  
ic2|Pik3r1|Braf|Pten|Prkcb|Itga1|  
Pip4k2b|Myk|Iqgap2|Cfl2|Braf|Kras|Arhgef12|Pak4|

1|Tcl1|Bcl2l1|Fgf14|Cdkn1b|Akt3|Ccnd2|Met|Bcl2|Atf2|Prlr|Akt2|Ccnd1|Pkn2|Thbs1|Lamc2|Kras|  
d1|Pik3ca|Fzd3|Bax|Ikbkb|Rassf1|Fgfr3|Cdkn1a|Fgf20|Fos|  
:2|

||
