# Supplementary material for: Differentiation‐Associated MicroRNA Alterations in Mouse Heart‐Derived Sca‐1+CD31− and Sca‐1+CD31+ Cells
Source: Hindawi journal article supplement (doi:10.1155/2016/9586751), 2016-01-01
Supplement: f1 [file 9586751.f1.zip]

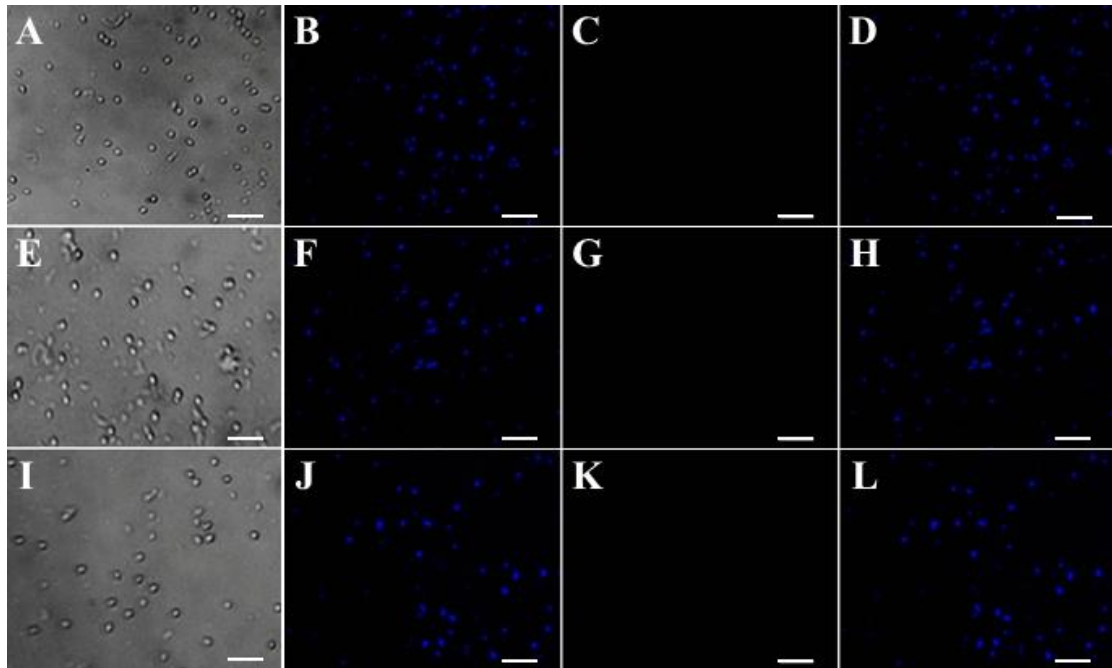

Figure S1.

Differentiation potential of Sca-1<sup>+</sup>CD31<sup>+</sup> cells by FACS into cardiomyocyte, smooth muscle, and endothelial cells in vitro. No cells were stained for the specific marker after induction.

Immuno-fluorescence staining of cardiac-specific marker-Cardiac Troponin I (C), smooth muscle marker  $\alpha$ -Smooth Muscle Actin (G), endothelial cell marker-Von Willebrand Factor (K). They were green and no cells were stained for green.

(A), (E) and (I) were controls with bright light to show cell morphology after induction, the cells morphology has not changed after induction.

(B), (F) and (J) Nuclei (blue) were counter-stained by DAPI.

(D), (H) and (L) were merged images of B, C, and F, G, and J, K, respectively. (Scale bars, 50  $\mu$ m).
