# Supplementary material for: Differentiation‐Associated MicroRNA Alterations in Mouse Heart‐Derived Sca‐1+CD31− and Sca‐1+CD31+ Cells
Source: Hindawi journal article supplement (doi:10.1155/2016/9586751), 2016-01-01
Supplement: f1 [file 9586751.f1.zip]

| Pathway ID | Pathway Name | Diff | Gene C | Gene A   | MoI      | Enrichment | p-value    | FDR | Gene Symb | Rank |
|------------|--------------|------|--------|----------|----------|------------|------------|-----|-----------|------|
| 4151       | PI3K-Akt sig | 112  | 356    | 5.425027 | 7.82E-51 | 1.99E-48   | Tnc Fgf4   |     |           | 1    |
| 5200       | Pathways in  | 99   | 326    | 5.236625 | 1.64E-43 | 2.09E-41   | Fzd5 Fgf7  |     |           | 2    |
| 4010       | MAPK signa   | 88   | 259    | 5.85891  | 3.44E-43 | 2.92E-41   | Bdnf Atf2  |     |           | 3    |
| 5205       | Proteoglyca  | 81   | 230    | 6.07283  | 3.57E-41 | 2.27E-39   | Hspg2 Hs   |     |           | 4    |
| 1100       | Metabolic p  | 179  | 1242   | 2.485223 | 6.59E-29 | 3.36E-27   | Dgkd Dak   |     |           | 5    |
| 4810       | Regulation   | 63   | 217    | 5.006275 | 6.99E-27 | 2.97E-25   | Fgf16 Fgd  |     |           | 6    |
| 4510       | Focal adhe   | 61   | 205    | 5.131093 | 1.04E-26 | 3.79E-25   | Itga3 Pter |     |           | 7    |
| 4722       | Neurotropl   | 45   | 123    | 6.308721 | 3.41E-24 | 1.09E-22   | Pik3ca Mi  |     |           | 8    |
| 4360       | Axon guida   | 46   | 133    | 5.964034 | 1.66E-23 | 4.70E-22   | Unc5d Se   |     |           | 9    |
| 5166       | HTLV-I infe  | 68   | 290    | 4.043383 | 5.05E-23 | 1.29E-21   | Il15ra Tgf |     |           | 10   |
| 4390       | Hippo signa  | 49   | 156    | 5.416333 | 7.65E-23 | 1.77E-21   | Wnt3 Ccr   |     |           | 11   |
| 4144       | Endocytosi   | 59   | 225    | 4.521717 | 9.41E-23 | 2.00E-21   | Src Dnm1   |     |           | 12   |
| 4150       | mTOR signa   | 31   | 62     | 8.621919 | 6.39E-22 | 1.25E-20   | Eif4b Ddit |     |           | 13   |
| 4910       | Insulin sign | 45   | 141    | 5.503352 | 2.16E-21 | 3.93E-20   | Pik3ca Gy  |     |           | 14   |
| 4310       | Wnt signali  | 46   | 148    | 5.359571 | 2.64E-21 | 4.48E-20   | Siah1a Ca  |     |           | 15   |
| 5161       | Hepatitis B  | 46   | 149    | 5.323601 | 3.60E-21 | 5.74E-20   | Fas Nras   |     |           | 16   |
| 4062       | Chemokine    | 53   | 199    | 4.59258  | 6.74E-21 | 1.01E-19   | Gnai3 Shc  |     |           | 17   |
| 4141       | Protein prc  | 48   | 169    | 4.897658 | 2.54E-20 | 3.59E-19   | Rpn2 Ube   |     |           | 18   |
| 4912       | GnRH signa   | 34   | 89     | 6.587533 | 2.89E-19 | 3.88E-18   | Pla2g4d A  |     |           | 19   |
| 4728       | Dopaminer    | 41   | 135    | 5.237017 | 1.05E-18 | 1.33E-17   | Ppp2r3a I  |     |           | 20   |
| 4012       | ErbB signal  | 33   | 87     | 6.540766 | 1.27E-18 | 1.55E-17   | Crkl Egfr  |     |           | 21   |
| 5215       | Prostate ca  | 33   | 89     | 6.393782 | 2.89E-18 | 3.35E-17   | Chuk Ccn   |     |           | 22   |
| 5220       | Chronic my   | 30   | 74     | 6.990745 | 5.34E-18 | 5.92E-17   | Hdac1 Ctl  |     |           | 23   |
| 4916       | Melanogen    | 34   | 100    | 5.862905 | 2.03E-17 | 2.16E-16   | Creb3l4 C  |     |           | 24   |
| 5100       | Bacterial in | 30   | 78     | 6.632245 | 3.11E-17 | 3.18E-16   | Elmo1 Cd   |     |           | 25   |
| 5203       | Viral carcin | 52   | 236    | 3.79949  | 1.18E-16 | 1.16E-15   | Gtf2a1 Cc  |     |           | 26   |
| 4120       | Ubiquitin n  | 39   | 143    | 4.702865 | 4.46E-16 | 4.21E-15   | Nedd4 Uk   |     |           | 27   |
| 5202       | Transcripti  | 44   | 181    | 4.191872 | 6.09E-16 | 5.54E-15   | Cdkn1b D   |     |           | 28   |
| 4740       | Olfactory ti | 11   | 1080   | 0.175632 | 9.56E-16 | 8.31E-15   | Adrbk2 A   |     |           | 29   |
| 4915       | Estrogen si  | 32   | 99     | 5.573766 | 9.77E-16 | 8.31E-15   | Shc2 Pik3  |     |           | 30   |
| 4725       | Cholinergic  | 34   | 114    | 5.142899 | 1.89E-15 | 1.55E-14   | Map2k1 C   |     |           | 31   |
| 5160       | Hepatitis C  | 37   | 136    | 4.691338 | 2.82E-15 | 2.25E-14   | Mapk12 C   |     |           | 32   |
| 4660       | T cell recep | 33   | 110    | 5.173151 | 4.09E-15 | 3.16E-14   | Cblb Tnf   |     |           | 33   |
| 5221       | Acute myel   | 24   | 57     | 7.260563 | 4.47E-15 | 3.35E-14   | Pik3ca Cc  |     |           | 34   |
| 5222       | Small cell l | 29   | 86     | 5.814782 | 6.39E-15 | 4.65E-14   | Itgav Pik3 |     |           | 35   |
| 4622       | RIG-I-like r | 26   | 69     | 6.497678 | 7.80E-15 | 5.52E-14   | Mavs Cyl   |     |           | 36   |
| 4512       | ECM-recep    | 29   | 87     | 5.747946 | 9.05E-15 | 6.23E-14   | Itgav Lam  |     |           | 37   |
| 4380       | Osteoclast   | 35   | 127    | 4.752239 | 1.06E-14 | 7.10E-14   | Cylid Rela |     |           | 38   |
| 5169       | Epstein-Bai  | 47   | 220    | 3.683911 | 1.25E-14 | 8.10E-14   | Tbk1 Ywh   |     |           | 39   |
| 5164       | Influenza A  | 41   | 172    | 4.11045  | 1.27E-14 | 8.10E-14   | Trim25 N   |     |           | 40   |
| 5214       | Glioma       | 25   | 66     | 6.531757 | 2.27E-14 | 1.41E-13   | Braf Pik3c |     |           | 41   |
| 5212       | Pancreatic   | 25   | 67     | 6.434268 | 3.43E-14 | 2.08E-13   | Chuk Pik3  |     |           | 42   |
| 4020       | Calcium sig  | 42   | 185    | 3.914817 | 3.69E-14 | 2.19E-13   | Cacna1c I  |     |           | 43   |
| 4666       | Fc gamma I   | 29   | 92     | 5.435557 | 4.76E-14 | 2.76E-13   | Arpc4 Ppi  |     |           | 44   |
| 4911       | Insulin secr | 28   | 88     | 5.486675 | 1.02E-13 | 5.75E-13   | Trpm4 Sn   |     |           | 45   |
| 4370       | VEGF signa   | 24   | 66     | 6.270486 | 2.23E-13 | 1.23E-12   | Ptk2 Pla2  |     |           | 46   |

|                    |    |     |          |          |          |            |    |
|--------------------|----|-----|----------|----------|----------|------------|----|
| 4630 Jak-STAT si   | 37 | 156 | 4.089884 | 3.06E-13 | 1.66E-12 | Socs7 Cbl  | 47 |
| 5218 Melanoma      | 25 | 73  | 5.905424 | 3.38E-13 | 1.80E-12 | Fgf16 Fgf  | 48 |
| 4270 Vascular sn   | 33 | 127 | 4.480682 | 3.92E-13 | 2.04E-12 | Ednra Prk  | 49 |
| 5162 Measles       | 34 | 140 | 4.187789 | 1.41E-12 | 7.19E-12 | Pik3ca Ifn | 50 |
| 4723 Retrograde    | 29 | 104 | 4.808378 | 1.59E-12 | 7.80E-12 | Mgll Map   | 51 |
| 5142 Chagas dise   | 29 | 104 | 4.808378 | 1.59E-12 | 7.80E-12 | Akt1 Ppp   | 52 |
| 4340 Hedgehog :    | 20 | 49  | 7.038301 | 1.93E-12 | 9.31E-12 | Wnt3 Lrp   | 53 |
| 4080 Neuroactiv    | 50 | 282 | 3.057418 | 3.44E-12 | 1.62E-11 | Adcyap1r   | 54 |
| 4114 Oocyte me     | 30 | 115 | 4.498392 | 4.29E-12 | 1.99E-11 | Ppp2r5a I  | 55 |
| 4530 Tight juncti  | 33 | 138 | 4.123526 | 4.83E-12 | 2.20E-11 | Mpp5 Prk   | 56 |
| 4514 Cell adhesi   | 36 | 163 | 3.808455 | 6.23E-12 | 2.79E-11 | Cdh3 Nrx   | 57 |
| 5213 Endometria    | 20 | 52  | 6.632245 | 7.28E-12 | 3.18E-11 | Braf Egfr  | 58 |
| 4914 Progesterone  | 26 | 89  | 5.037525 | 7.36E-12 | 3.18E-11 | Adcy2 Cd   | 59 |
| 5210 Colorectal c  | 22 | 64  | 5.927569 | 8.71E-12 | 3.70E-11 | Pik3cd Cc  | 60 |
| 4066 HIF-1 signa   | 29 | 113 | 4.42541  | 1.54E-11 | 6.35E-11 | Prkcb Ld   | 61 |
| 5145 Toxoplasma    | 29 | 113 | 4.42541  | 1.54E-11 | 6.35E-11 | Il10ra Ccr | 62 |
| 4724 Glutamater    | 29 | 117 | 4.274114 | 3.91E-11 | 1.58E-10 | Slc38a1 C  | 63 |
| 4115 p53 signalin  | 22 | 69  | 5.498035 | 4.81E-11 | 1.89E-10 | Bai1 Bax   | 64 |
| 5211 Renal cell c  | 22 | 69  | 5.498035 | 4.81E-11 | 1.89E-10 | Pak4 Nra   | 65 |
| 3015 mRNA surv     | 26 | 97  | 4.622059 | 6.35E-11 | 2.45E-10 | Wdr33 Pp   | 66 |
| 5414 Dilated can   | 25 | 90  | 4.789955 | 6.45E-11 | 2.46E-10 | Tnf Lmna   | 67 |
| 4664 Fc epsilon f  | 22 | 71  | 5.343161 | 9.08E-11 | 3.40E-10 | Mapk3 Ni   | 68 |
| 4713 Circadian e   | 26 | 99  | 4.528685 | 1.05E-10 | 3.87E-10 | Gnb5 Gng   | 69 |
| 4142 Lysosome      | 29 | 124 | 4.032833 | 1.79E-10 | 6.52E-10 | Slc11a2 N  | 70 |
| 4060 Cytokine-cy   | 45 | 266 | 2.917191 | 2.17E-10 | 7.77E-10 | Ghr Tgfb2  | 71 |
| 4971 Gastric acid  | 22 | 74  | 5.126546 | 2.25E-10 | 7.77E-10 | Prkacb M   | 72 |
| 5412 Arrhythmo     | 22 | 74  | 5.126546 | 2.25E-10 | 7.77E-10 | Itgb1 Tcf  | 73 |
| 5223 Non-small c   | 19 | 55  | 5.956962 | 2.26E-10 | 7.77E-10 | Raf1 Pik3  | 74 |
| 5168 Herpes sim    | 39 | 211 | 3.18725  | 2.53E-10 | 8.61E-10 | Socs3 Eif  | 75 |
| 4720 Long-term     | 21 | 70  | 5.173151 | 4.91E-10 | 1.65E-09 | Raf1 Rps   | 76 |
| 4960 Aldosterone   | 16 | 40  | 6.897535 | 5.22E-10 | 1.73E-09 | Atp1b4 N   | 77 |
| 5410 Hypertroph    | 23 | 84  | 4.721527 | 5.37E-10 | 1.75E-09 | Itgav Itga | 78 |
| 4920 Adipocytok    | 21 | 71  | 5.10029  | 6.59E-10 | 2.13E-09 | Camkk1 F   | 79 |
| 4540 Gap junctio   | 23 | 88  | 4.506912 | 1.47E-09 | 4.70E-09 | Adcy2 Cd   | 80 |
| 3040 Spliceosom    | 29 | 137 | 3.650155 | 2.22E-09 | 6.98E-09 | Snnp40 S   | 81 |
| 4961 Endocrine :   | 18 | 56  | 5.542662 | 2.66E-09 | 8.27E-09 | Ap2a1 At   | 82 |
| 4962 Vasopressin   | 16 | 44  | 6.270486 | 2.77E-09 | 8.51E-09 | Aqp2 Prk   | 83 |
| 4726 Serotonerg    | 28 | 130 | 3.714057 | 2.81E-09 | 8.53E-09 | Slc18a2 C  | 84 |
| 4930 Type II diab  | 17 | 50  | 5.862905 | 2.84E-09 | 8.53E-09 | Ikbkb Hk1  | 85 |
| 4970 Salivary sec  | 21 | 77  | 4.702865 | 3.43E-09 | 1.02E-08 | Adcy3 Ad   | 86 |
| 5032 Morphine :    | 23 | 93  | 4.264605 | 4.78E-09 | 1.40E-08 | Arrb1 Gnl  | 87 |
| 4620 Toll-like rec | 24 | 101 | 4.097545 | 5.15E-09 | 1.49E-08 | Chuk Map   | 88 |
| 5146 Amoebiasis    | 26 | 120 | 3.736165 | 9.38E-09 | 2.69E-08 | Pik3ca Il1 | 89 |
| 4727 GABAergic     | 22 | 90  | 4.21516  | 1.33E-08 | 3.78E-08 | Gad2 Prk   | 90 |
| 5217 Basal cell c  | 17 | 55  | 5.329913 | 1.49E-08 | 4.18E-08 | Wnt3a W    | 91 |
| 4721 Synaptic ve   | 18 | 63  | 4.926811 | 2.19E-08 | 6.04E-08 | Atp6v1a I  | 92 |
| 5031 Amphetam      | 19 | 70  | 4.68047  | 2.20E-08 | 6.04E-08 | Grin2b Pr  | 93 |

|                   |    |     |          |          |          |            |     |
|-------------------|----|-----|----------|----------|----------|------------|-----|
| 4662 B cell recep | 20 | 78  | 4.421497 | 2.66E-08 | 7.21E-08 | Mapk3 Ik   | 94  |
| 230 Purine met    | 31 | 173 | 3.089936 | 4.07E-08 | 1.09E-07 | Gmps Pol   | 95  |
| 5216 Thyroid car  | 12 | 29  | 7.135381 | 5.82E-08 | 1.55E-07 | Tcf7 Braf  | 96  |
| 4520 Adherens j   | 19 | 75  | 4.368439 | 7.53E-08 | 1.98E-07 | Smad3 Pv   | 97  |
| 4350 TGF-beta si  | 20 | 83  | 4.155142 | 8.30E-08 | 2.16E-07 | Inhbe Tnf  | 98  |
| 564 Glycerophc    | 21 | 91  | 3.979347 | 8.65E-08 | 2.23E-07 | Pla2g4d L  | 99  |
| 532 Glycosamir    | 10 | 20  | 8.621919 | 9.16E-08 | 2.34E-07 | B3gat3 Cl  | 100 |
| 4210 Apoptosis    | 20 | 84  | 4.105676 | 1.03E-07 | 2.60E-07 | Rela Ikbl  | 101 |
| 4330 Notch signa  | 15 | 49  | 5.278726 | 1.31E-07 | 3.28E-07 | Dll4 Hdac  | 102 |
| 5034 Alcoholism   | 33 | 202 | 2.817063 | 1.48E-07 | 3.66E-07 | H2afj Nra  | 103 |
| 5030 Cocaine ad   | 15 | 50  | 5.173151 | 1.77E-07 | 4.34E-07 | Nfkb1 Gri  | 104 |
| 4110 Cell cycle   | 25 | 129 | 3.341829 | 1.91E-07 | 4.63E-07 | Cdk2 Cdk   | 105 |
| 4070 Phosphatid   | 19 | 81  | 4.044851 | 2.84E-07 | 6.84E-07 | Prkcb Pip  | 106 |
| 4621 NOD-like re  | 16 | 59  | 4.676295 | 3.17E-07 | 7.52E-07 | Tnf Mapk   | 107 |
| 5152 Tuberculos   | 30 | 179 | 2.890029 | 3.19E-07 | 7.52E-07 | Rela Map   | 108 |
| 4972 Pancreatic   | 21 | 103 | 3.515734 | 8.15E-07 | 1.91E-06 | Plcb1 Atp  | 109 |
| 4670 Leukocyte t  | 23 | 121 | 3.277754 | 8.78E-07 | 2.04E-06 | Gnai3 Thy  | 110 |
| 561 Glycerolipid  | 15 | 56  | 4.618885 | 9.19E-07 | 2.11E-06 | Aldh3a2 L  | 111 |
| 4973 Carbohydrate | 13 | 45  | 4.981553 | 2.07E-06 | 4.71E-06 | Prkcb Akt  | 112 |
| 562 Inositol pho  | 15 | 61  | 4.240288 | 3.03E-06 | 6.83E-06 | Inpp5b Pl  | 113 |
| 4320 Dorso-vent   | 9  | 22  | 7.054297 | 3.65E-06 | 8.17E-06 | Grb2 Map   | 114 |
| 4974 Protein dig  | 18 | 88  | 3.527149 | 5.10E-06 | 1.13E-05 | Atp1b3 A   | 115 |
| 5020 Prion disea  | 11 | 35  | 5.419492 | 5.58E-06 | 1.23E-05 | Prnp Stip  | 116 |
| 4650 Natural kill | 22 | 125 | 3.034915 | 5.94E-06 | 1.29E-05 | Sh2d1a M   | 117 |
| 5133 Pertussis    | 16 | 74  | 3.728397 | 8.50E-06 | 1.84E-05 | Gnai3 Ma   | 118 |
| 5140 Leishmania   | 15 | 66  | 3.919054 | 8.75E-06 | 1.88E-05 | Nfkb1 Jak  | 119 |
| 4064 NF-kappa B   | 19 | 103 | 3.180902 | 1.35E-05 | 2.88E-05 | Traf2 Chu  | 120 |
| 4730 Long-term    | 14 | 61  | 3.957602 | 1.60E-05 | 3.38E-05 | Gna11 Plc  | 121 |
| 5132 Salmonella   | 16 | 79  | 3.492423 | 2.07E-05 | 4.32E-05 | Arpc5 Arp  | 122 |
| 5016 Huntington   | 27 | 189 | 2.463405 | 2.87E-05 | 5.96E-05 | Pparg Ap   | 123 |
| 512 Mucin type    | 9  | 28  | 5.542662 | 3.69E-05 | 7.59E-05 | Galnt3 Gc  | 124 |
| 4640 Hematopoi    | 16 | 88  | 3.135243 | 8.47E-05 | 0.000173 | Itga3 Itga | 125 |
| 410 beta-Alanin   | 9  | 31  | 5.006275 | 9.20E-05 | 0.000186 | Aldh1b1 C  | 126 |
| 5219 Bladder car  | 10 | 39  | 4.421497 | 0.000114 | 0.000229 | Raf1 Map   | 127 |
| 4950 Maturity on  | 8  | 26  | 5.305796 | 0.000154 | 0.000307 | Nr5a2 On   | 128 |
| 330 Arginine an   | 12 | 57  | 3.630282 | 0.000174 | 0.000344 | Cndp1 Ac   | 129 |
| 4913 Ovarian ste  | 12 | 58  | 3.56769  | 0.000208 | 0.000407 | Cyp1b1 A   | 130 |
| 510 N-Glycan b    | 11 | 50  | 3.793644 | 0.000223 | 0.000435 | Mgat3 M    | 131 |
| 5134 Legionellos  | 12 | 59  | 3.507221 | 0.000247 | 0.000477 | Nfkb1 Tnf  | 132 |
| 3013 RNA transp   | 23 | 172 | 2.305862 | 0.000399 | 0.000765 | Clns1a Th  | 133 |
| 514 Other type    | 8  | 30  | 4.598357 | 0.000469 | 0.000886 | B3gat1 Pc  | 134 |
| 3060 Protein exp  | 8  | 30  | 4.598357 | 0.000469 | 0.000886 | Immp1l S   | 135 |
| 240 Pyrimidine    | 16 | 102 | 2.704916 | 0.000515 | 0.000966 | Uck1 Nm    | 136 |
| 100 Steroid bio   | 6  | 17  | 6.08606  | 0.000537 | 0.001    | Dhcr24 C   | 137 |
| 62 Fatty acid e   | 7  | 24  | 5.029453 | 0.000631 | 0.001167 | Hadha Ek   | 138 |
| 4975 Fat digesti  | 9  | 40  | 3.879863 | 0.000777 | 0.001415 | Ppap2b D   | 139 |
| 5033 Nicotine ac  | 9  | 40  | 3.879863 | 0.000777 | 0.001415 | Gabra3 Sl  | 140 |

|                    |    |     |          |          |          |            |     |
|--------------------|----|-----|----------|----------|----------|------------|-----|
| 4964 Proximal tu   | 6  | 20  | 5.173151 | 0.001448 | 0.002614 | Atp1b4 A   | 141 |
| 4130 SNARE inte    | 8  | 35  | 3.941449 | 0.001456 | 0.002614 | Snap25 V   | 142 |
| 4623 Cytosolic D   | 11 | 62  | 3.05939  | 0.001602 | 0.002857 | Rela Polr  | 143 |
| 4744 Phototrans    | 7  | 28  | 4.310959 | 0.001761 | 0.003118 | Rho Gnat   | 144 |
| 4978 Mineral ab    | 9  | 46  | 3.373794 | 0.002287 | 0.004023 | Slc30a1 S  | 145 |
| 603 Glycosphin     | 5  | 15  | 5.747946 | 0.002404 | 0.004198 | St8sia1 N  | 146 |
| 650 Butanoate      | 7  | 30  | 4.023562 | 0.002734 | 0.004743 | Acsm5 Ak   | 147 |
| 640 Propanoate     | 7  | 31  | 3.89377  | 0.003357 | 0.005745 | Aldh1b1 J  | 148 |
| 4710 Circadian rl  | 7  | 31  | 3.89377  | 0.003357 | 0.005745 | Bhlhe40 F  | 149 |
| 5144 Malaria       | 9  | 49  | 3.167235 | 0.003648 | 0.006202 | Sdc2 Tnf   | 150 |
| 4976 Bile secreti  | 11 | 72  | 2.634475 | 0.005607 | 0.009469 | Adcy2 Atj  | 151 |
| 4672 Intestinal ir | 8  | 43  | 3.208156 | 0.005937 | 0.00996  | Pigr Cd86  | 152 |
| 4140 Regulation    | 7  | 35  | 3.448767 | 0.007008 | 0.011605 | Atg12 Prk  | 153 |
| 5143 African try   | 7  | 35  | 3.448767 | 0.007008 | 0.011605 | Il12a Gna  | 154 |
| 5010 Alzheimer's   | 21 | 183 | 1.978801 | 0.007195 | 0.011836 | Atp5g2 A   | 155 |
| 4966 Collecting c  | 6  | 27  | 3.831964 | 0.007797 | 0.012746 | Atp6v1g1   | 156 |
| 5014 Amyotroph     | 9  | 55  | 2.821719 | 0.008266 | 0.013426 | Bax Cyca   | 157 |
| 10 Glycolysis /    | 10 | 66  | 2.612703 | 0.009106 | 0.014691 | Aldh3a2 F  | 158 |
| 3022 Basal trans   | 8  | 46  | 2.998928 | 0.00916  | 0.014691 | Taf11 Taf  | 159 |
| 600 Sphingolipi    | 8  | 47  | 2.935121 | 0.010488 | 0.016657 | Kdsr Neu   | 160 |
| 3018 RNA degra     | 11 | 78  | 2.431823 | 0.010517 | 0.016657 | Parn Pan   | 161 |
| 4260 Cardiac mu    | 11 | 79  | 2.401041 | 0.011592 | 0.018247 | Atp1a2 Sl  | 162 |
| 3410 Base excisi   | 7  | 39  | 3.095048 | 0.0131   | 0.020494 | Pold3 Xrc  | 163 |
| 310 Lysine degr    | 8  | 49  | 2.81532  | 0.01358  | 0.021115 | Aldh1b1 I  | 164 |
| 5323 Rheumatoi     | 11 | 84  | 2.258122 | 0.018324 | 0.028083 | Atp6v1f A  | 165 |
| 533 Glycosamir     | 4  | 15  | 4.598357 | 0.018392 | 0.028083 | B3gnt1 Fu  | 166 |
| 604 Glycosphin     | 4  | 15  | 4.598357 | 0.018392 | 0.028083 | St3gal5 St | 167 |
| 4145 Phagosome     | 19 | 180 | 1.820183 | 0.020468 | 0.031067 | Itgb3 Rab  | 168 |
| 534 Glycosamir     | 5  | 24  | 3.592466 | 0.022012 | 0.033213 | Hs3st3a1   | 169 |
| 770 Pantothen      | 4  | 16  | 4.310959 | 0.023413 | 0.035119 | Aasdhpt    | 170 |
| 500 Starch and     | 8  | 54  | 2.554643 | 0.024286 | 0.036217 | Pygm Kl    | 171 |
| 601 Glycosphin     | 5  | 25  | 3.448767 | 0.026226 | 0.038882 | B3gnt5 Fu  | 172 |
| 1230 Biosynthes    | 10 | 77  | 2.239459 | 0.026704 | 0.039362 | Prps1 Pga  | 173 |
| 250 Alanine, as    | 6  | 35  | 2.956086 | 0.028809 | 0.04222  | Gad2 Gfp   | 174 |
| 450 Selenocom      | 4  | 17  | 4.057373 | 0.029234 | 0.042598 | Papss2 Co  | 175 |
| 5340 Primary im    | 6  | 36  | 2.873973 | 0.032917 | 0.047692 | Cd4 Icos   | 176 |
| 920 Sulfur meta    | 3  | 11  | 4.702865 | 0.045246 | 0.065185 | Chst11 Pa  | 177 |
| 51 Fructose ar     | 6  | 39  | 2.652898 | 0.047615 | 0.067832 | Sord Mtr   | 178 |
| 270 Cysteine ar    | 6  | 39  | 2.652898 | 0.047615 | 0.067832 | Dnmt3b C   | 179 |
