# Supplementary material for: Differentiation‐Associated MicroRNA Alterations in Mouse Heart‐Derived Sca‐1+CD31− and Sca‐1+CD31+ Cells
Source: Hindawi journal article supplement (doi:10.1155/2016/9586751), 2016-01-01
Supplement: f1 [file 9586751.f1.zip]

[illegible]

[illegible]
