# Supplementary material for: Differentiation‐Associated MicroRNA Alterations in Mouse Heart‐Derived Sca‐1+CD31− and Sca‐1+CD31+ Cells
Source: Hindawi journal article supplement (doi:10.1155/2016/9586751), 2016-01-01
Supplement: f1 [file 9586751.f1.zip]

| GO ID      | GO Name                                                              | Gene Counts | Gene Amount in | Enrichment Score | p-value   |
|------------|----------------------------------------------------------------------|-------------|----------------|------------------|-----------|
| GO:0006355 | regulation of transcription, DNA-dependent                           | 311         | 1852           | 4.8773469        | 8.82E-124 |
| GO:0006351 | transcription, DNA-dependent                                         | 290         | 1756           | 4.7966466        | 3.97E-113 |
| GO:0045944 | positive regulation of transcription from RNA polymerase II promoter | 157         | 745            | 6.1207919        | 7.55E-76  |
| GO:0006810 | transport                                                            | 213         | 1712           | 3.6136           | 8.40E-60  |
| GO:0007275 | multicellular organismal development                                 | 150         | 954            | 4.5667488        | 8.08E-55  |
| GO:0000122 | negative regulation of transcription from RNA polymerase II promoter | 108         | 561            | 5.5914588        | 3.50E-48  |
| GO:0045893 | positive regulation of transcription, DNA-dependent                  | 104         | 523            | 5.7755838        | 8.46E-48  |
| GO:0006468 | protein phosphorylation                                              | 106         | 611            | 5.0388206        | 6.97E-43  |
| GO:0007395 | nervous system development                                           | 75          | 307            | 7.0955673        | 2.99E-41  |
| GO:0016310 | phosphorylation                                                      | 109         | 684            | 4.62844          | 1.74E-40  |
| GO:0030154 | cell differentiation                                                 | 101         | 636            | 4.6124163        | 1.97E-37  |
| GO:0006915 | apoptotic process                                                    | 91          | 540            | 4.8945399        | 6.90E-36  |
| GO:0008285 | negative regulation of cell proliferation                            | 66          | 315            | 6.0855189        | 4.32E-32  |
| GO:0007155 | cell adhesion                                                        | 82          | 500            | 4.7633017        | 1.45E-31  |
| GO:0006357 | regulation of transcription from RNA polymerase II promoter          | 55          | 241            | 6.6284179        | 6.55E-29  |
| GO:0015031 | protein transport                                                    | 81          | 538            | 4.3728742        | 1.46E-28  |
| GO:0045892 | negative regulation of transcription, DNA-dependent                  | 70          | 429            | 4.7391994        | 5.90E-27  |
| GO:0008284 | positive regulation of cell proliferation                            | 65          | 382            | 4.9421308        | 3.67E-26  |
| GO:0043066 | negative regulation of apoptotic process                             | 72          | 480            | 4.3566783        | 2.12E-25  |
| GO:0016568 | chromatin modification                                               | 52          | 251            | 6.0171919        | 2.84E-25  |

| FDR       | Gene Symbol  | Rank |
|-----------|--------------|------|
| 3.49E-120 | Ikzf4 Zzz3 L | 1    |
| 7.86E-110 | Esr2 Thrap3  | 2    |
| 9.96E-73  | Cask Nr2f1   | 3    |
| 8.31E-57  | Rab11a Bic   | 4    |
| 6.40E-52  | Nr6a1 Diap3  | 5    |
| 2.31E-45  | Ciita Sox6 F | 6    |
| 4.78E-45  | Ikzf1 Nr4a2  | 7    |
| 3.45E-40  | Glyctk Ttbk3 | 8    |
| 1.31E-38  | Hoxa1 Amic   | 9    |
| 6.89E-38  | Tesk1 Etnk1  | 10   |
| 7.10E-35  | Myt1 Fzd5 S  | 11   |
| 2.28E-33  | Ntn1 Traf1 E | 12   |
| 1.32E-29  | Rbpj Tob1 F  | 13   |
| 4.11E-29  | Arvcf Lamc2  | 14   |
| 1.73E-26  | Sp4 Trak2 F  | 15   |
| 3.62E-26  | Sec63 Rab2   | 16   |
| 1.37E-24  | Foxp1 Kdm    | 17   |
| 8.07E-24  | Ntn1 Id4 Ac  | 18   |
| 4.42E-23  | Ivns1abp Br  | 19   |
| 5.61E-23  | Prkcb Suv3   | 20   |
