# Supplementary material for: Differentiation‐Associated MicroRNA Alterations in Mouse Heart‐Derived Sca‐1+CD31− and Sca‐1+CD31+ Cells
Source: Hindawi journal article supplement (doi:10.1155/2016/9586751), 2016-01-01
Supplement: f1 [file 9586751.f1.zip]

| Probe Set | Accession | Transcript | Mean Sign | Mean Sign | Fold Chang | Rank    | miRNA Fea | Biotype |
|-----------|-----------|------------|-----------|-----------|------------|---------|-----------|---------|
| MIMAT000  | MIMAT000  | mmu-miR-1  | 8.484721  | 1.988954  | 90.24449   | 1 up    |           | miRNA   |
| MIMAT000  | MIMAT000  | mmu-miR-2  | 8.037142  | 1.584963  | 87.55872   | 2 up    |           | miRNA   |
| MIMAT000  | MIMAT000  | mmu-miR-3  | 9.536876  | 3.776693  | 54.19857   | 3 up    |           | miRNA   |
| MIMAT000  | MIMAT000  | mmu-miR-4  | 8.038028  | 2.520742  | 45.80033   | 4 up    |           | miRNA   |
| MIMAT000  | MIMAT000  | mmu-miR-5  | 6.64982   | 1.584963  | 33.4714    | 5 up    |           | miRNA   |
| MIMAT000  | MIMAT000  | mmu-miR-6  | 6.423538  | 1.584963  | 28.61253   | 6 up    |           | miRNA   |
| MIMAT000  | MIMAT000  | mmu-miR-7  | 11.29332  | 6.640055  | 25.16356   | 7 up    |           | miRNA   |
| MIMAT000  | MIMAT000  | mmu-miR-8  | 6.225692  | 1.584963  | 24.94587   | 8 up    |           | miRNA   |
| MIMAT000  | MIMAT000  | mmu-miR-9  | 11.59644  | 7.016186  | 23.92178   | 9 up    |           | miRNA   |
| MIMAT000  | MIMAT000  | mmu-miR-9  | 11.59644  | 7.016186  | 23.92178   | 9 up    |           | miRNA   |
| MIMAT000  | MIMAT000  | mmu-miR-11 | 6.114916  | 1.584963  | 23.10211   | 11 up   |           | miRNA   |
| MIMAT000  | MIMAT000  | mmu-miR-12 | 6.080152  | 1.584963  | 22.55209   | 12 up   |           | miRNA   |
| MIMAT000  | MIMAT000  | mmu-miR-13 | 10.60338  | 6.114045  | 22.46078   | 13 up   |           | miRNA   |
| MIMAT000  | MIMAT000  | mmu-miR-14 | 6.020404  | 1.584963  | 21.63719   | 14 up   |           | miRNA   |
| MIMAT000  | MIMAT000  | mmu-miR-15 | 10.09154  | 5.884948  | 18.46332   | 15 up   |           | miRNA   |
| MIMAT000  | MIMAT000  | mmu-miR-16 | 5.603774  | 1.584963  | 16.20999   | 16 up   |           | miRNA   |
| MIMAT000  | MIMAT000  | mmu-miR-17 | 5.519777  | 1.584963  | 15.29315   | 17 up   |           | miRNA   |
| MIMAT000  | MIMAT000  | mmu-miR-18 | 7.086901  | 3.171173  | 15.09217   | 18 up   |           | miRNA   |
| MIMAT000  | MIMAT000  | mmu-miR-19 | 5.41267   | 1.584963  | 14.1989    | 19 up   |           | miRNA   |
| MIMAT000  | MIMAT000  | mmu-miR-20 | 5.386729  | 1.584963  | 13.94587   | 20 up   |           | miRNA   |
| MIMAT000  | MIMAT000  | mmu-miR-21 | 1.667878  | 5.437548  | -13.639    | 21 down |           | miRNA   |
| MIMAT000  | MIMAT000  | mmu-miR-22 | 5.331895  | 1.584963  | 13.42576   | 22 up   |           | miRNA   |
| MIMAT000  | MIMAT000  | mmu-miR-23 | 5.199028  | 1.584963  | 12.24453   | 23 up   |           | miRNA   |
| MIMAT000  | MIMAT000  | mmu-miR-24 | 1.668029  | 5.217974  | -11.7122   | 24 down |           | miRNA   |
| MIMAT000  | MIMAT000  | mmu-miR-25 | 5.122574  | 1.584963  | 11.61254   | 25 up   |           | miRNA   |
| MIMAT000  | MIMAT000  | mmu-miR-26 | 5.066834  | 1.584963  | 11.17243   | 26 up   |           | miRNA   |
| MIMAT000  | MIMAT000  | mmu-miR-27 | 4.857437  | 1.584963  | 9.663019   | 27 up   |           | miRNA   |
| MIMAT000  | MIMAT000  | mmu-miR-28 | 4.81391   | 1.584963  | 9.375834   | 28 up   |           | miRNA   |
| MIMAT000  | MIMAT000  | mmu-miR-29 | 11.54973  | 8.382254  | 8.984742   | 29 up   |           | miRNA   |
| MIMAT000  | MIMAT000  | mmu-miR-30 | 4.710837  | 1.584963  | 8.729349   | 30 up   |           | miRNA   |
| MIMAT000  | MIMAT000  | mmu-miR-31 | 5.807811  | 2.714152  | 8.536585   | 31 up   |           | miRNA   |
| MIMAT000  | MIMAT000  | mmu-miR-32 | 4.658102  | 7.750097  | -8.52674   | 32 down |           | miRNA   |
| MIMAT000  | MIMAT000  | mmu-miR-33 | 9.912927  | 6.933577  | 7.886308   | 33 up   |           | miRNA   |
| MIMAT000  | MIMAT000  | mmu-miR-34 | 4.575666  | 1.646301  | 7.61775    | 34 up   |           | miRNA   |
| MIMAT000  | MIMAT000  | mmu-miR-35 | 1.584963  | 4.484997  | -7.46444   | 35 down |           | miRNA   |
| MIMAT000  | MIMAT000  | mmu-miR-36 | 4.481357  | 1.584963  | 7.44563    | 36 up   |           | miRNA   |
| MIMAT000  | MIMAT000  | mmu-miR-37 | 4.457592  | 1.584963  | 7.323986   | 37 up   |           | miRNA   |
| MIMAT000  | MIMAT000  | mmu-miR-38 | 10.69413  | 7.88496   | 7.008822   | 38 up   |           | miRNA   |
| MIMAT000  | MIMAT000  | mmu-miR-39 | 3.638831  | 6.433767  | -6.94      | 39 down |           | miRNA   |
| MIMAT000  | MIMAT000  | mmu-miR-40 | 4.323979  | 1.584963  | 6.676148   | 40 up   |           | miRNA   |
| MIMAT000  | MIMAT000  | mmu-miR-41 | 13.28055  | 10.54751  | 6.648537   | 41 up   |           | miRNA   |
| MIMAT000  | MIMAT000  | mmu-miR-42 | 4.238282  | 1.584963  | 6.291129   | 42 up   |           | miRNA   |
| MIMAT000  | MIMAT000  | mmu-miR-43 | 5.3687    | 7.975934  | -6.09334   | 43 down |           | miRNA   |
| MIMAT000  | MIMAT000  | mmu-miR-44 | 5.334557  | 2.732725  | 6.07057    | 44 up   |           | miRNA   |
| MIMAT000  | MIMAT000  | mmu-miR-45 | 4.173548  | 1.584963  | 6.015084   | 45 up   |           | miRNA   |
| MIMAT000  | MIMAT000  | mmu-miR-46 | 4.483769  | 7.066558  | -5.99097   | 46 down |           | miRNA   |

|          |          |           |          |          |          |         |       |
|----------|----------|-----------|----------|----------|----------|---------|-------|
| MIMAT000 | MIMAT000 | mmu-miR-4 | 4.163549 | 1.584963 | 5.973539 | 47 up   | miRNA |
| MIMAT000 | MIMAT000 | mmu-miR-4 | 4.817308 | 2.375287 | 5.434024 | 48 up   | miRNA |
| MIMAT000 | MIMAT000 | mmu-miR-4 | 8.994647 | 11.42247 | -5.38081 | 49 down | miRNA |
| MIMAT000 | MIMAT000 | mmu-miR-4 | 2.359226 | 4.764559 | -5.29758 | 50 down | miRNA |
| MIMAT000 | MIMAT000 | mmu-miR-4 | 8.083945 | 5.695928 | 5.234374 | 51 up   | miRNA |
| MIMAT000 | MIMAT000 | mmu-miR-4 | 2.80074  | 5.101978 | -4.92881 | 52 down | miRNA |
| MIMAT000 | MIMAT000 | mmu-miR-4 | 8.688893 | 10.96212 | -4.83405 | 53 down | miRNA |
| MIMAT000 | MIMAT000 | mmu-miR-4 | 3.43575  | 5.680157 | -4.73842 | 54 down | miRNA |
| MIMAT000 | MIMAT000 | mmu-miR-4 | 3.825072 | 1.584963 | 4.724328 | 55 up   | miRNA |
| MIMAT002 | MIMAT002 | mmu-miR-4 | 1.584963 | 3.786521 | -4.59976 | 56 down | miRNA |
| MIMAT002 | MIMAT002 | mmu-miR-4 | 3.785021 | 1.584963 | 4.594978 | 57 up   | miRNA |
| MIMAT000 | MIMAT000 | mmu-miR-4 | 6.78322  | 8.970211 | -4.55355 | 58 down | miRNA |
| MIMAT000 | MIMAT000 | mmu-miR-4 | 5.602654 | 7.788252 | -4.54915 | 59 down | miRNA |
| MIMAT000 | MIMAT000 | mmu-miR-4 | 4.72177  | 2.570816 | 4.441214 | 60 up   | miRNA |
| MIMAT000 | MIMAT000 | mmu-miR-4 | 3.705516 | 1.584963 | 4.348606 | 61 up   | miRNA |
| MIMAT002 | MIMAT002 | mmu-miR-4 | 2.549096 | 4.665197 | -4.33521 | 62 down | miRNA |
| MIMAT001 | MIMAT001 | mmu-miR-4 | 1.869599 | 3.985699 | -4.3352  | 63 down | miRNA |
| MIMAT000 | MIMAT000 | mmu-miR-4 | 3.226917 | 5.30236  | -4.21474 | 64 down | miRNA |
| MIMAT000 | MIMAT000 | mmu-miR-4 | 3.825577 | 1.752872 | 4.206747 | 65 up   | miRNA |
| MIMAT001 | MIMAT001 | mmu-miR-4 | 5.794992 | 3.76451  | 4.085413 | 66 up   | miRNA |
| MIMAT000 | MIMAT000 | mmu-miR-4 | 2.772193 | 4.783041 | -4.03019 | 67 down | miRNA |
| MIMAT000 | MIMAT000 | mmu-miR-4 | 1.706716 | 3.666596 | -3.8903  | 68 down | miRNA |
| MIMAT000 | MIMAT000 | mmu-miR-4 | 3.506606 | 1.584963 | 3.788543 | 69 up   | miRNA |
| MIMAT000 | MIMAT000 | mmu-miR-4 | 5.884851 | 3.982054 | 3.739375 | 70 up   | miRNA |
| MIMAT000 | MIMAT000 | mmu-miR-4 | 5.167017 | 3.27468  | 3.712361 | 71 up   | miRNA |
| MIMAT000 | MIMAT000 | mmu-miR-4 | 3.857911 | 5.722863 | -3.64256 | 72 down | miRNA |
| MIMAT000 | MIMAT000 | mmu-miR-4 | 9.84741  | 8.061993 | 3.447181 | 73 up   | miRNA |
| MIMAT000 | MIMAT000 | mmu-miR-4 | 3.3465   | 1.584963 | 3.390592 | 74 up   | miRNA |
| MIMAT000 | MIMAT000 | mmu-miR-4 | 6.812777 | 5.052448 | 3.387754 | 75 up   | miRNA |
| MIMAT000 | MIMAT000 | mmu-miR-4 | 3.333126 | 1.584963 | 3.359305 | 76 up   | miRNA |
| MIMAT000 | MIMAT000 | mmu-miR-4 | 3.330934 | 1.584963 | 3.354205 | 77 up   | miRNA |
| MIMAT000 | MIMAT000 | mmu-miR-4 | 7.117255 | 8.857476 | -3.34086 | 78 down | miRNA |
| MIMAT000 | MIMAT000 | mmu-miR-4 | 6.971595 | 5.232104 | 3.339173 | 79 up   | miRNA |
| MIMAT000 | MIMAT000 | mmu-miR-4 | 3.314614 | 1.584963 | 3.316476 | 80 up   | miRNA |
| MIMAT000 | MIMAT000 | mmu-miR-4 | 6.826199 | 5.108148 | 3.289917 | 81 up   | miRNA |
| MIMAT000 | MIMAT000 | mmu-miR-4 | 2.849456 | 4.528302 | -3.20172 | 82 down | miRNA |
| MIMAT000 | MIMAT000 | mmu-miR-4 | 5.126674 | 6.796404 | -3.18155 | 83 down | miRNA |
| MIMAT001 | MIMAT001 | mmu-miR-4 | 1.584963 | 3.23246  | -3.1329  | 84 down | miRNA |
| MIMAT000 | MIMAT000 | mmu-miR-4 | 7.020565 | 5.386729 | 3.103371 | 85 up   | miRNA |
| MIMAT001 | MIMAT001 | mmu-miR-4 | 3.8634   | 5.48558  | -3.0784  | 86 down | miRNA |
| MIMAT000 | MIMAT000 | mmu-miR-4 | 4.385696 | 2.790757 | 3.020817 | 87 up   | miRNA |
| MIMAT000 | MIMAT000 | mmu-miR-4 | 6.756397 | 8.349437 | -3.01684 | 88 down | miRNA |
| MIMAT000 | MIMAT000 | mmu-miR-4 | 4.156427 | 2.563633 | 3.016329 | 89 up   | miRNA |
| MIMAT000 | MIMAT000 | mmu-miR-4 | 3.399281 | 1.827314 | 2.973098 | 90 up   | miRNA |
| MIMAT000 | MIMAT000 | mmu-miR-4 | 4.815563 | 6.387121 | -2.97226 | 91 down | miRNA |
| MIMAT002 | MIMAT002 | mmu-miR-4 | 1.584963 | 3.143177 | -2.94489 | 92 down | miRNA |
| MIMAT001 | MIMAT001 | mmu-miR-4 | 3.134626 | 1.584963 | 2.927487 | 93 up   | miRNA |

|          |          |           |          |          |          |          |       |
|----------|----------|-----------|----------|----------|----------|----------|-------|
| MIMAT000 | MIMAT000 | mmu-miR-1 | 3.133464 | 1.584963 | 2.925131 | 94 up    | miRNA |
| MIMAT002 | MIMAT002 | mmu-miR-1 | 2.189386 | 3.722907 | -2.89492 | 95 down  | miRNA |
| MIMAT000 | MIMAT000 | mmu-miR-1 | 3.201399 | 1.667878 | 2.894915 | 96 up    | miRNA |
| MIMAT000 | MIMAT000 | mmu-miR-1 | 2.730057 | 4.260673 | -2.88909 | 97 down  | miRNA |
| MIMAT000 | MIMAT000 | mmu-miR-1 | 3.686972 | 2.158902 | 2.883998 | 98 up    | miRNA |
| MIMAT001 | MIMAT001 | mmu-miR-1 | 3.26391  | 1.736851 | 2.881977 | 99 up    | miRNA |
| MIMAT000 | MIMAT000 | mmu-miR-1 | 5.913881 | 7.414658 | -2.82995 | 100 down | miRNA |
| MIMAT001 | MIMAT001 | mmu-miR-1 | 3.082409 | 1.584963 | 2.823424 | 101 up   | miRNA |
| MIMAT000 | MIMAT000 | mmu-miR-1 | 4.044055 | 2.55059  | 2.815644 | 102 up   | miRNA |
| MIMAT001 | MIMAT001 | mmu-miR-1 | 2.631866 | 4.093677 | -2.75454 | 103 down | miRNA |
| MIMAT003 | MIMAT003 | mmu-miR-1 | 1.82787  | 3.240223 | -2.66171 | 104 down | miRNA |
| MIMAT000 | MIMAT000 | mmu-miR-1 | 9.112499 | 7.712298 | 2.639384 | 105 up   | miRNA |
| MIMAT002 | MIMAT002 | mmu-miR-1 | 1.584963 | 2.979682 | -2.62937 | 106 down | miRNA |
| MIMAT000 | MIMAT000 | mmu-miR-1 | 5.109202 | 6.495463 | -2.614   | 107 down | miRNA |
| MIMAT000 | MIMAT000 | mmu-miR-1 | 4.19293  | 5.57492  | -2.60628 | 108 down | miRNA |
| MIMAT002 | MIMAT002 | mmu-miR-1 | 4.788796 | 6.165166 | -2.59614 | 109 down | miRNA |
| MIMAT001 | MIMAT001 | mmu-miR-1 | 1.593277 | 2.956876 | -2.57326 | 110 down | miRNA |
| MIMAT000 | MIMAT000 | mmu-miR-1 | 6.968883 | 5.611291 | 2.562571 | 111 up   | miRNA |
| MIMAT001 | MIMAT001 | mmu-miR-1 | 3.964472 | 2.608453 | 2.559779 | 112 up   | miRNA |
| MIMAT002 | MIMAT002 | mmu-miR-1 | 2.897532 | 4.244485 | -2.54374 | 113 down | miRNA |
| MIMAT000 | MIMAT000 | mmu-miR-1 | 11.53997 | 10.19406 | 2.54191  | 114 up   | miRNA |
| MIMAT000 | MIMAT000 | mmu-miR-1 | 9.321246 | 10.65528 | -2.52107 | 115 down | miRNA |
| MIMAT001 | MIMAT001 | mmu-miR-1 | 2.918216 | 1.584963 | 2.519702 | 116 up   | miRNA |
| MIMAT000 | MIMAT000 | mmu-miR-1 | 7.611825 | 6.285853 | 2.507017 | 117 up   | miRNA |
| MIMAT000 | MIMAT000 | mmu-miR-1 | 6.789549 | 5.467718 | 2.499832 | 118 up   | miRNA |
| MIMAT000 | MIMAT000 | mmu-miR-1 | 2.125762 | 3.434487 | -2.47723 | 119 down | miRNA |
| MIMAT001 | MIMAT001 | mmu-miR-1 | 1.780133 | 3.085279 | -2.47109 | 120 down | miRNA |
| MIMAT002 | MIMAT002 | mmu-miR-1 | 2.745689 | 4.050826 | -2.47107 | 121 down | miRNA |
| MIMAT000 | MIMAT000 | mmu-miR-1 | 3.149227 | 4.454363 | -2.47107 | 122 down | miRNA |
| MIMAT000 | MIMAT000 | mmu-miR-1 | 1.584963 | 2.883628 | -2.46001 | 123 down | miRNA |
| MIMAT002 | MIMAT002 | mmu-miR-1 | 2.356712 | 3.650378 | -2.4515  | 124 down | miRNA |
| MIMAT000 | MIMAT000 | mmu-miR-1 | 2.154894 | 3.440136 | -2.43723 | 125 down | miRNA |
| MIMAT002 | MIMAT002 | mmu-miR-1 | 1.61063  | 2.895871 | -2.43723 | 126 down | miRNA |
| MIMAT000 | MIMAT000 | mmu-miR-1 | 8.654423 | 9.933396 | -2.42666 | 127 down | miRNA |
| MIMAT002 | MIMAT002 | mmu-miR-1 | 4.252475 | 5.516099 | -2.40098 | 128 down | miRNA |
| MIMAT000 | MIMAT000 | mmu-miR-1 | 6.398104 | 7.660621 | -2.39914 | 129 down | miRNA |
| MIMAT000 | MIMAT000 | mmu-miR-1 | 2.631124 | 3.878469 | -2.37404 | 130 down | miRNA |
| MIMAT001 | MIMAT001 | mmu-miR-1 | 2.08379  | 3.331135 | -2.37404 | 130 down | miRNA |
| MIMAT000 | MIMAT000 | mmu-miR-1 | 2.577708 | 3.805231 | -2.34165 | 132 down | miRNA |
| MIMAT002 | MIMAT002 | mmu-miR-1 | 1.584963 | 2.80881  | -2.33569 | 133 down | miRNA |
| MIMAT002 | MIMAT002 | mmu-miR-1 | 2.979682 | 4.196771 | -2.32477 | 134 down | miRNA |
| MIMAT002 | MIMAT002 | mmu-miR-1 | 3.484053 | 4.698417 | -2.32039 | 135 down | miRNA |
| MIMAT000 | MIMAT000 | mmu-miR-1 | 8.273575 | 9.477687 | -2.30395 | 136 down | miRNA |
| MIMAT002 | MIMAT002 | mmu-miR-1 | 1.934711 | 3.133382 | -2.29528 | 137 down | miRNA |
| MIMAT002 | MIMAT002 | mmu-miR-1 | 1.736659 | 2.923349 | -2.2763  | 138 down | miRNA |
| MIMAT001 | MIMAT001 | mmu-miR-1 | 2.758825 | 1.584963 | 2.256148 | 139 up   | miRNA |
| MIMAT000 | MIMAT000 | mmu-miR-1 | 8.338335 | 9.503254 | -2.24221 | 140 down | miRNA |

|          |          |             |          |          |          |     |      |       |
|----------|----------|-------------|----------|----------|----------|-----|------|-------|
| MIMAT000 | MIMAT000 | mmu-miR-9   | 9.794918 | 10.95819 | -2.23965 | 141 | down | miRNA |
| MIMAT002 | MIMAT002 | mmu-miR-142 | 3.095116 | 1.950569 | 2.210767 | 142 | up   | miRNA |
| MIMAT002 | MIMAT002 | mmu-miR-143 | 2.23873  | 3.37501  | -2.19814 | 143 | down | miRNA |
| MIMAT002 | MIMAT002 | mmu-miR-144 | 1.606882 | 2.743162 | -2.19814 | 144 | down | miRNA |
| MIMAT002 | MIMAT002 | mmu-miR-145 | 1.584963 | 2.718498 | -2.19396 | 145 | down | miRNA |
| MIMAT003 | MIMAT003 | mmu-miR-146 | 1.805559 | 2.930589 | -2.18106 | 146 | down | miRNA |
| MIMAT000 | MIMAT000 | mmu-miR-147 | 4.80116  | 3.687325 | 2.164202 | 147 | up   | miRNA |
| MIMAT002 | MIMAT002 | mmu-miR-148 | 2.680554 | 3.793564 | -2.16297 | 148 | down | miRNA |
| MIMAT002 | MIMAT002 | mmu-miR-149 | 3.366937 | 4.47702  | -2.15858 | 149 | down | miRNA |
| MIMAT002 | MIMAT002 | mmu-miR-150 | 2.69413  | 1.584963 | 2.157211 | 150 | up   | miRNA |
| MIMAT002 | MIMAT002 | mmu-miR-151 | 1.770894 | 2.876666 | -2.15214 | 151 | down | miRNA |
| MIMAT001 | MIMAT001 | mmu-miR-152 | 1.981479 | 3.086615 | -2.15119 | 152 | down | miRNA |
| MIMAT000 | MIMAT000 | mmu-miR-153 | 7.571301 | 8.671329 | -2.14359 | 153 | down | miRNA |
| MIMAT000 | MIMAT000 | mmu-miR-154 | 12.53249 | 13.62874 | -2.13799 | 154 | down | miRNA |
| MIMAT000 | MIMAT000 | mmu-miR-155 | 1.584963 | 2.680554 | -2.13701 | 155 | down | miRNA |
| MIMAT002 | MIMAT002 | mmu-miR-155 | 1.584963 | 2.680554 | -2.13701 | 155 | down | miRNA |
| MIMAT001 | MIMAT001 | mmu-miR-157 | 3.084125 | 1.990059 | 2.134748 | 157 | up   | miRNA |
| MIMAT000 | MIMAT000 | mmu-miR-158 | 9.672583 | 8.580685 | 2.131543 | 158 | up   | miRNA |
| MIMAT000 | MIMAT000 | mmu-miR-159 | 3.781378 | 4.859857 | -2.11181 | 159 | down | miRNA |
| MIMAT000 | MIMAT000 | mmu-miR-160 | 7.47449  | 8.550306 | -2.10791 | 160 | down | miRNA |
| MIMAT000 | MIMAT000 | mmu-miR-161 | 1.998072 | 3.070021 | -2.10227 | 161 | down | miRNA |
| MIMAT002 | MIMAT002 | mmu-miR-162 | 2.896343 | 1.837924 | 2.082648 | 162 | up   | miRNA |
| MIMAT003 | MIMAT003 | mmu-miR-163 | 3.985699 | 5.037278 | -2.0728  | 163 | down | miRNA |
| MIMAT000 | MIMAT000 | mmu-miR-164 | 9.689053 | 10.73872 | -2.07005 | 164 | down | miRNA |
| MIMAT000 | MIMAT000 | mmu-miR-165 | 6.67311  | 5.63136  | 2.058723 | 165 | up   | miRNA |
| MIMAT000 | MIMAT000 | mmu-miR-166 | 8.735561 | 9.775533 | -2.05619 | 166 | down | miRNA |
| MIMAT000 | MIMAT000 | mmu-miR-167 | 10.87946 | 11.90288 | -2.03273 | 167 | down | miRNA |
| MIMAT000 | MIMAT000 | mmu-miR-168 | 3.278211 | 2.265535 | 2.01765  | 168 | up   | miRNA |
| MIMAT000 | MIMAT000 | mmu-miR-169 | 6.882004 | 7.89329  | -2.01571 | 169 | down | miRNA |
| MIMAT000 | MIMAT000 | mmu-miR-170 | 2.870142 | 1.864125 | 2.008359 | 170 | up   | miRNA |
